# Supplementary material for: The Construction of Polycyclic Pyridones via Ring-Opening Transformations of 3-hydroxy-3,4-dihydropyrido[2,1-c][1,4]oxazine-1,8-diones
Source: MDPI journal article supplement (doi:10.3390/molecules28031285), 2023-01-28
Supplement: s1 [file s1]

## Supplementary materials

### The construction of polycyclic pyridones *via* ring-opening transformations of 3-hydroxy-3,4-dihydropyrido[2,1-*c*][1,4]oxazine-1,8-diones

Viktoriya V. Viktorova, Elena V. Steparuk, Dmitrii L. Obydenov,\* and Vyacheslav Y. Sosnovskikh\*

Institute of Natural Sciences and Mathematics, Ural Federal University, 51 Lenina Ave., 620000 Ekaterinburg, Russia

\* Correspondence: vy.sosnovskikh@urfu.ru; dobydenov@mail.ru; Tel.: +7-343-3899597

#### Table of Contents

|                                                                                                         |     |
|---------------------------------------------------------------------------------------------------------|-----|
| <sup>1</sup> H and <sup>13</sup> C NMR spectra of compounds <b>2</b> .....                              | S2  |
| <sup>1</sup> H and <sup>13</sup> C NMR spectra of compounds <b>3</b> .....                              | S13 |
| <sup>1</sup> H and <sup>13</sup> C NMR spectra of compounds <b>4</b> .....                              | S25 |
| <sup>1</sup> H and <sup>13</sup> C NMR spectra of compounds <b>5</b> .....                              | S33 |
| <sup>1</sup> H and <sup>13</sup> C NMR spectra of compounds <b>6</b> .....                              | S39 |
| <sup>1</sup> H NMR spectrum of the reaction mixture of <b>3b</b> with NH <sub>4</sub> OAc .....         | S47 |
| HRMS spectra of compounds <b>2a,e</b> , <b>3a,c,e,f</b> , <b>4a-d</b> , <b>5a-c</b> , <b>6a,b</b> ..... | S48 |

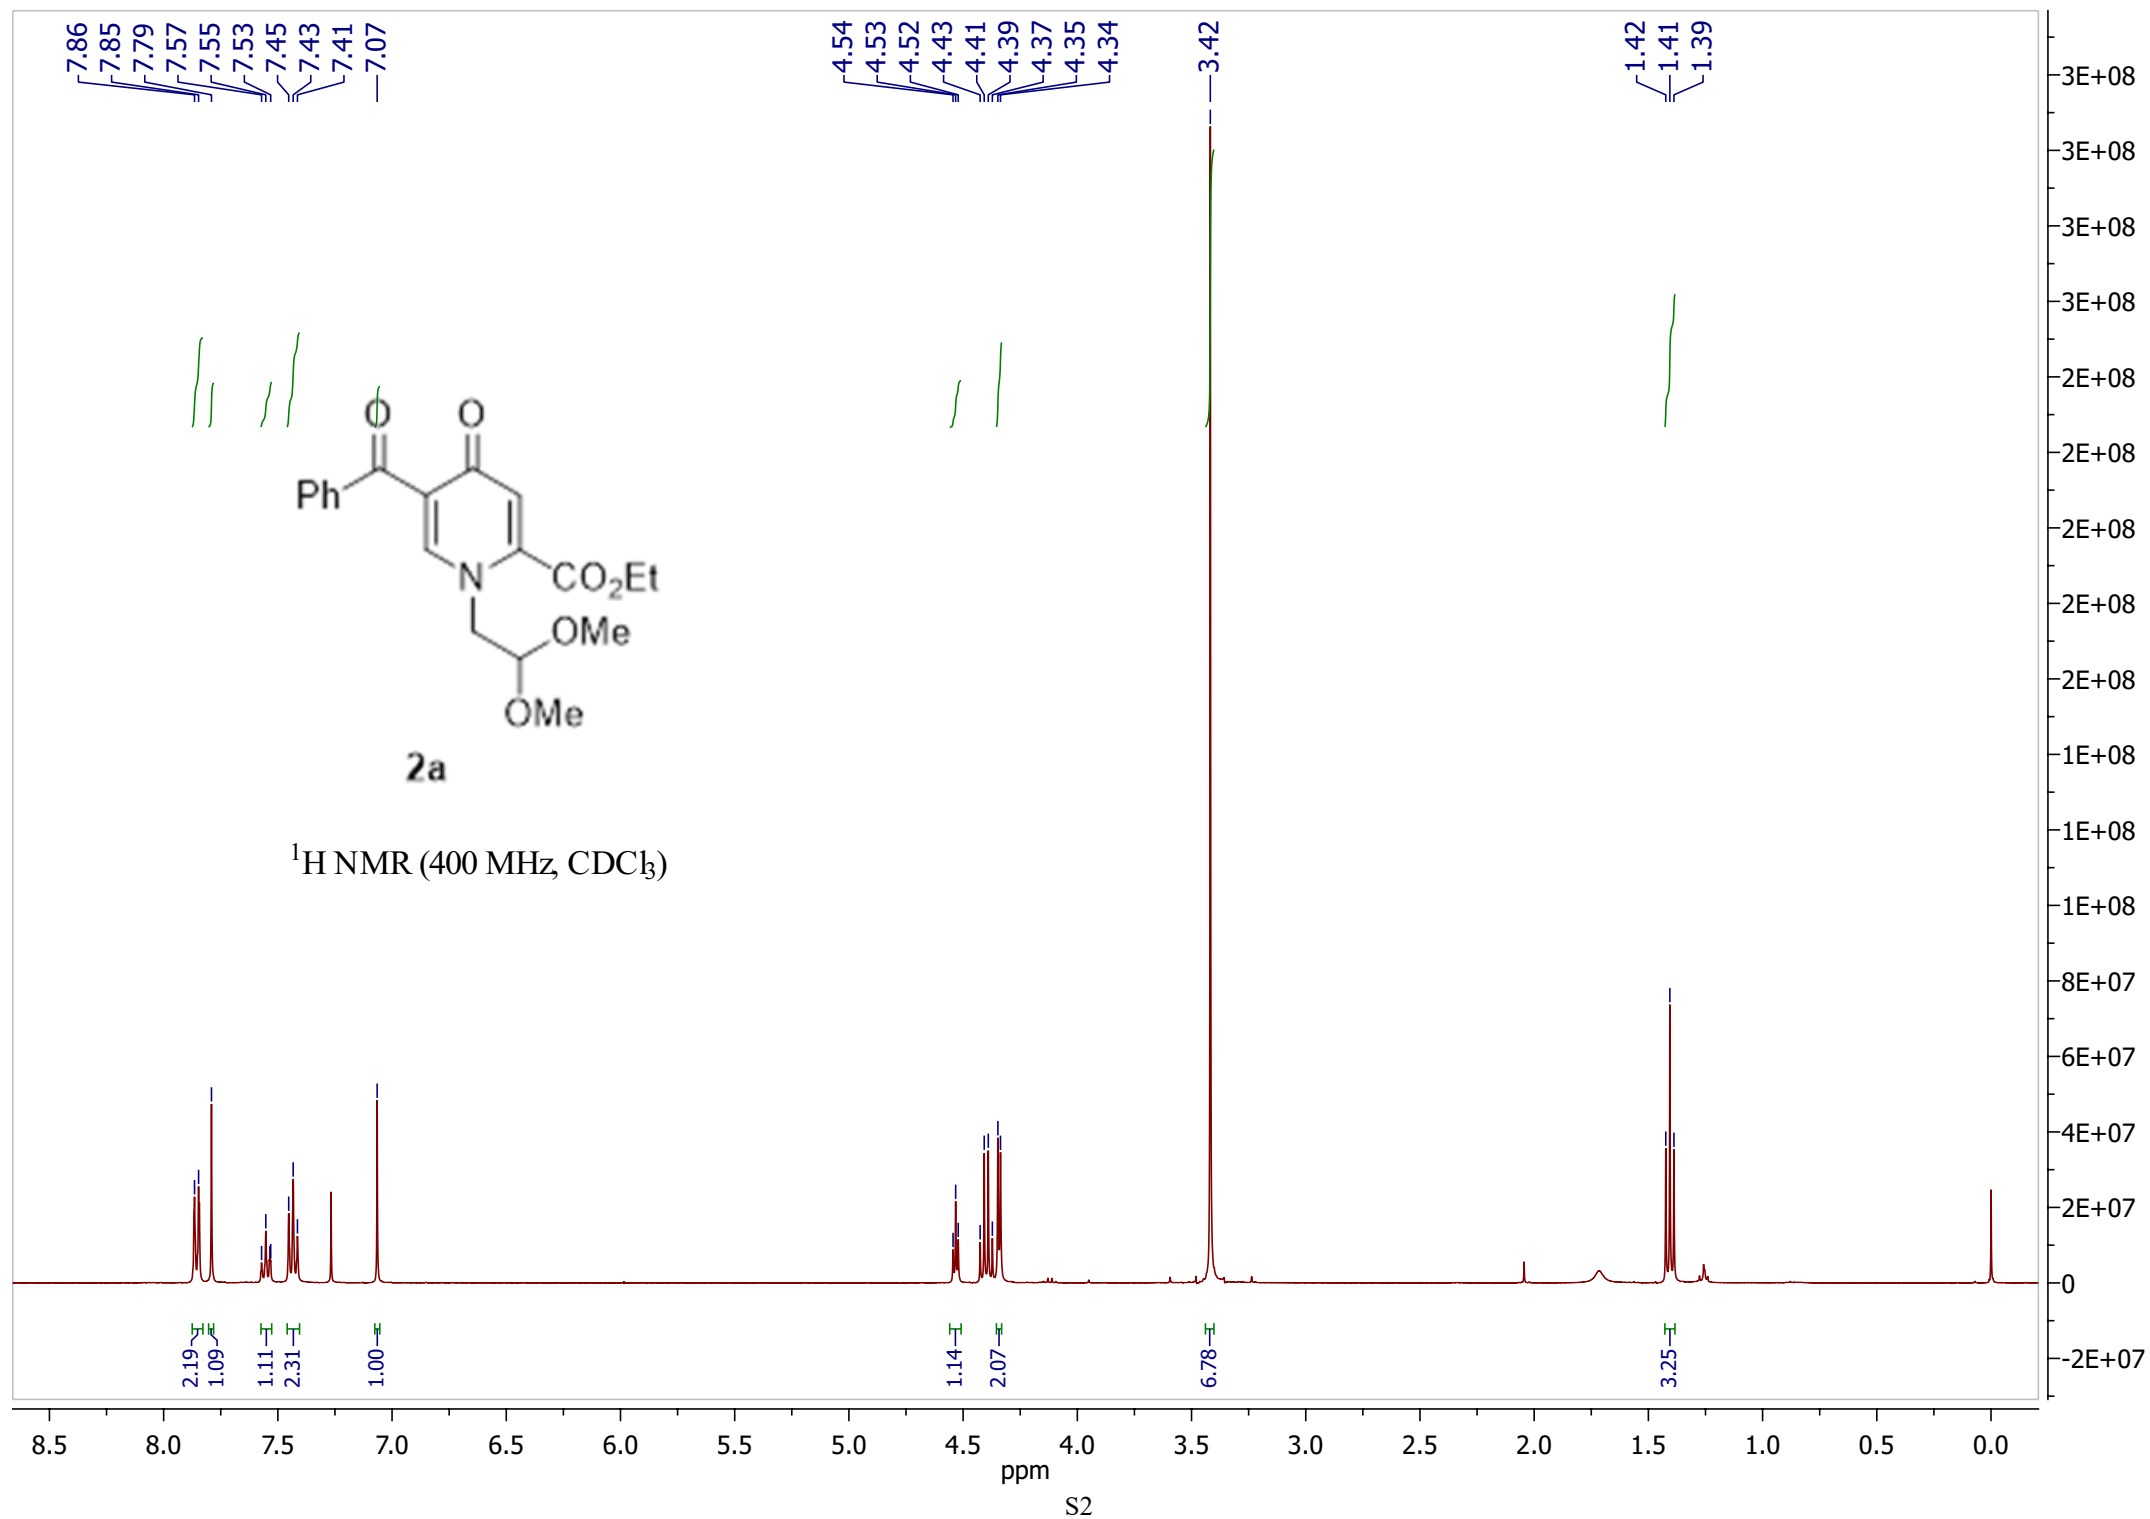

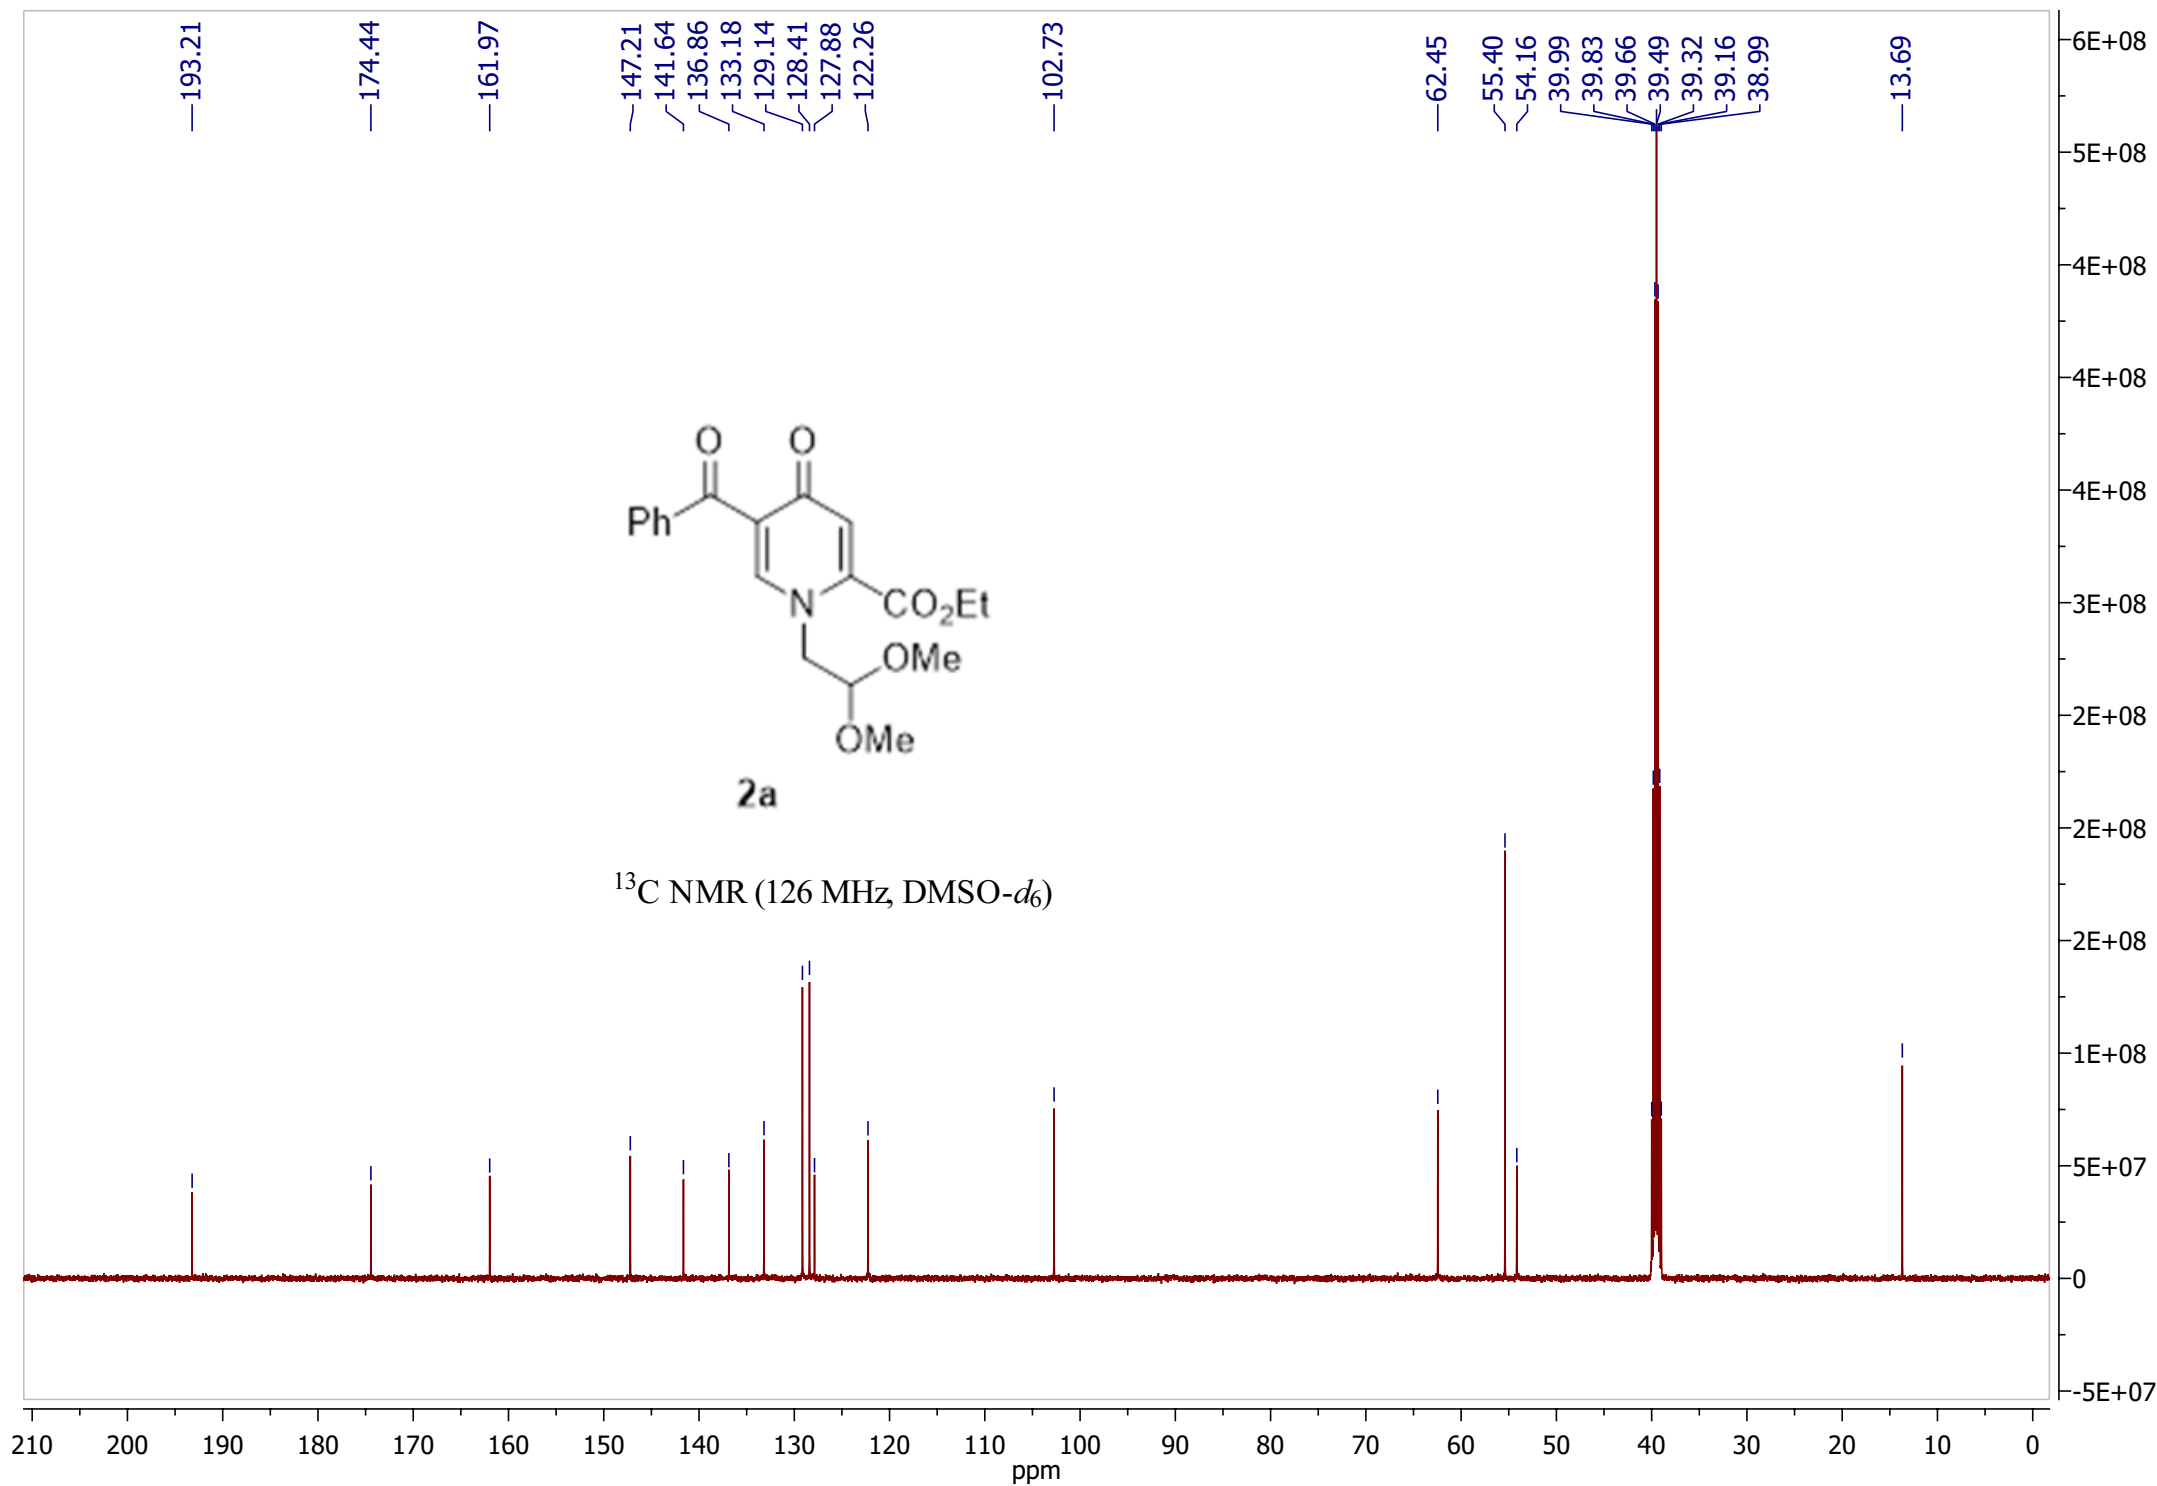

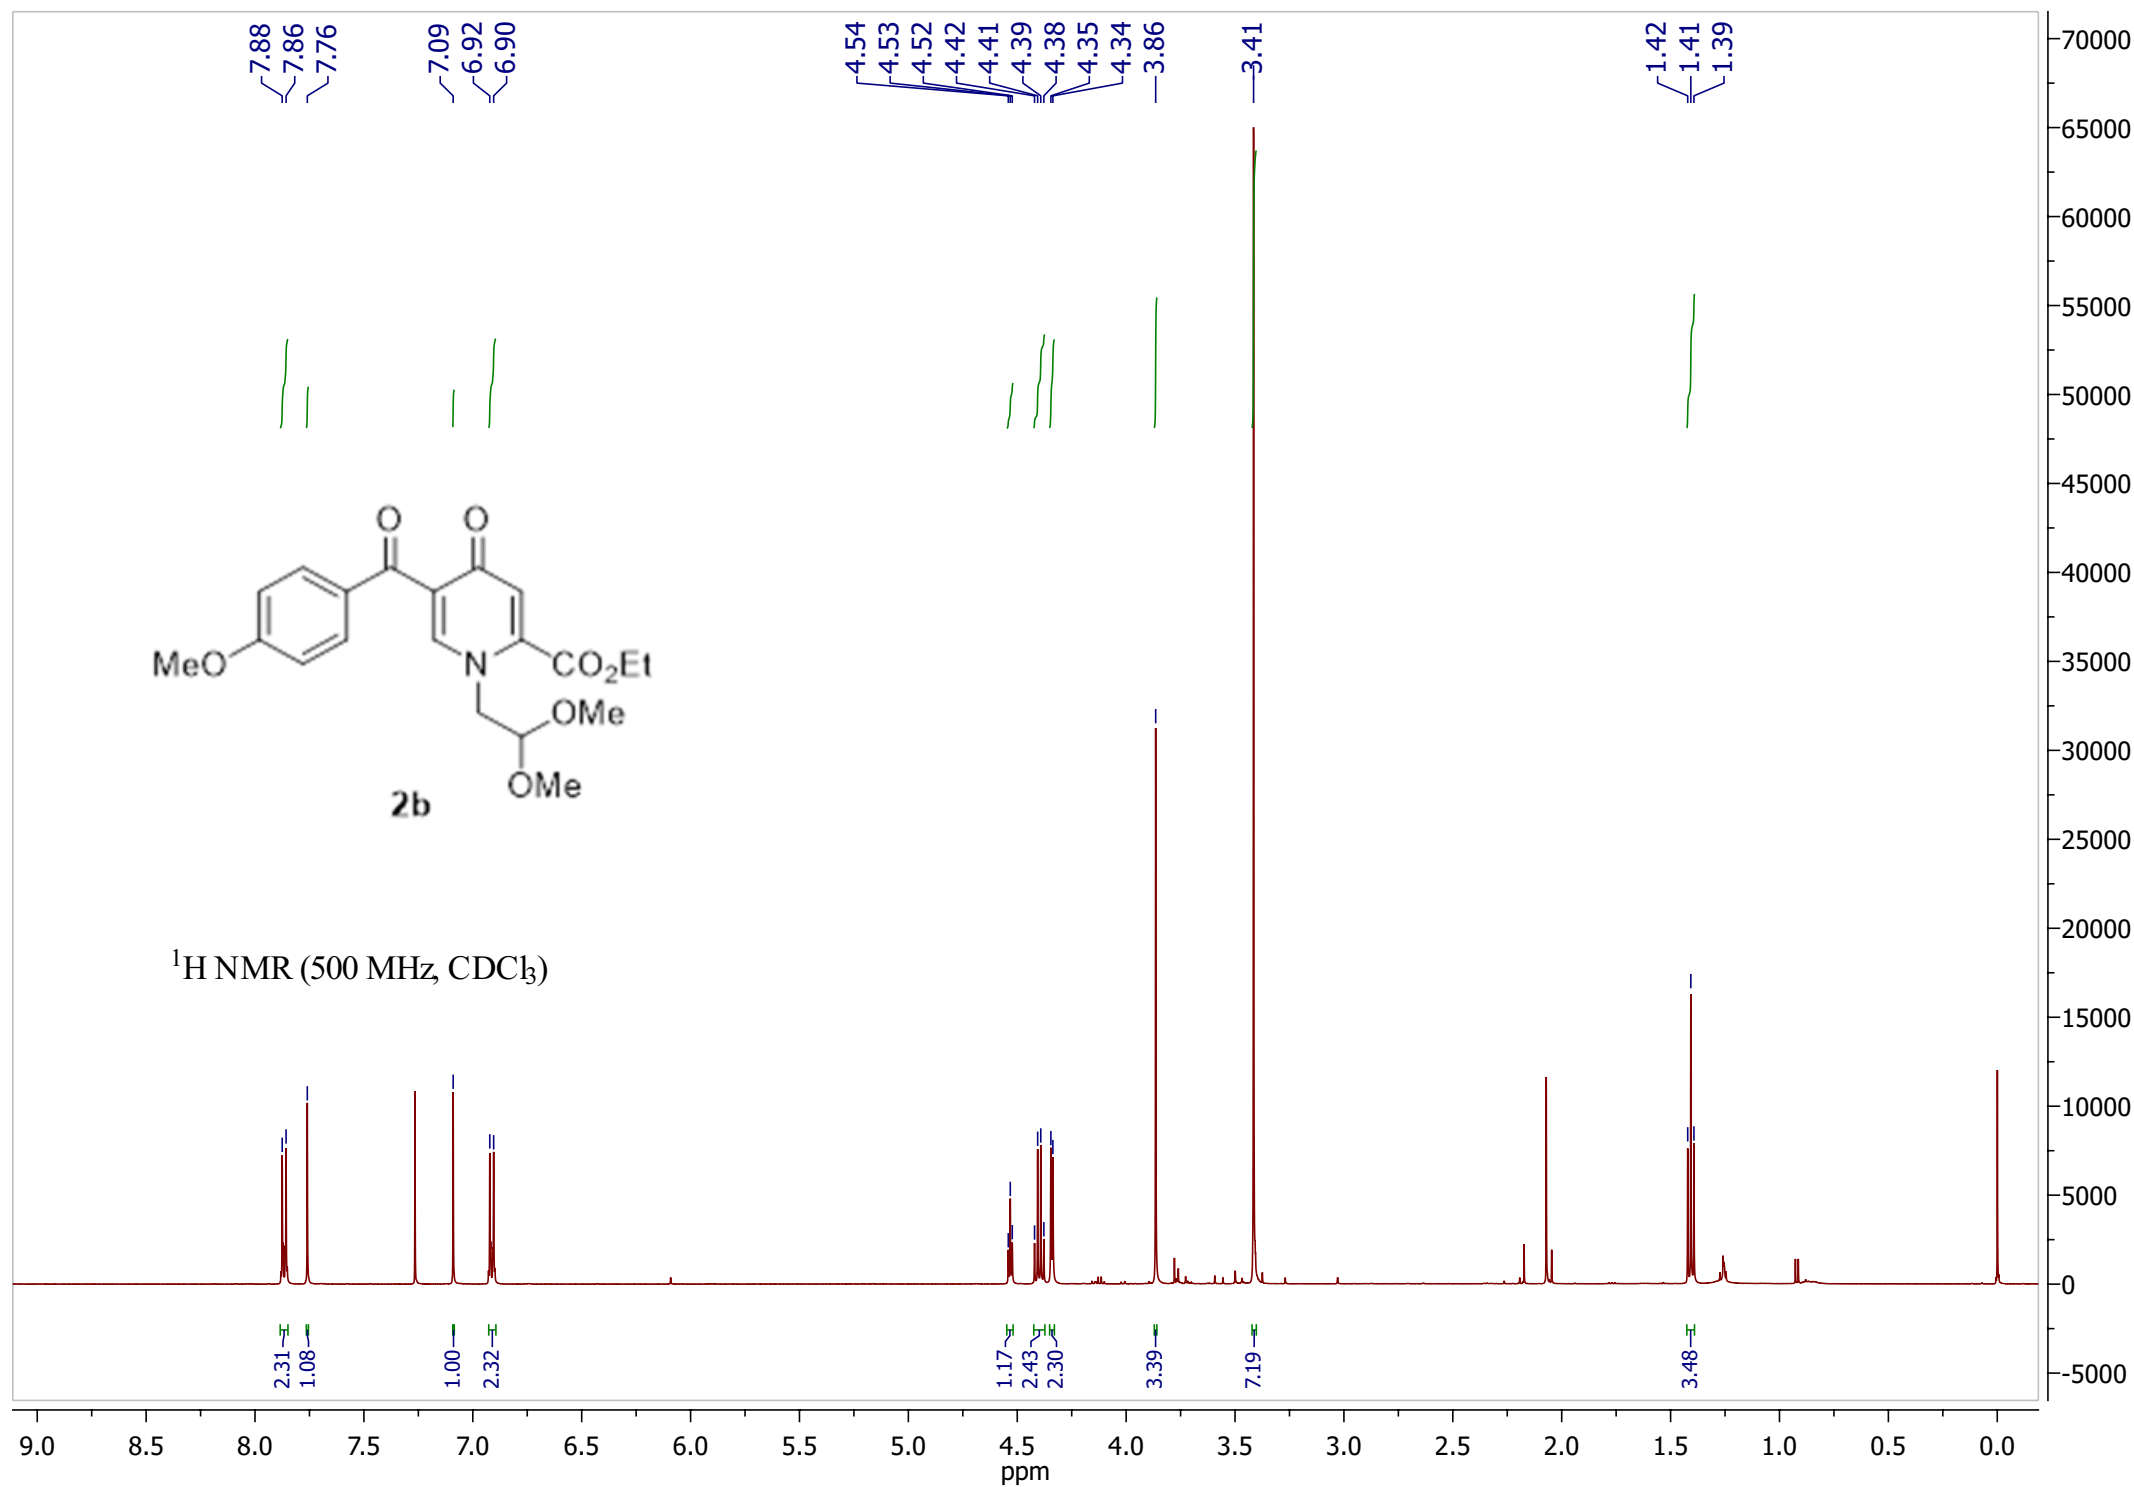



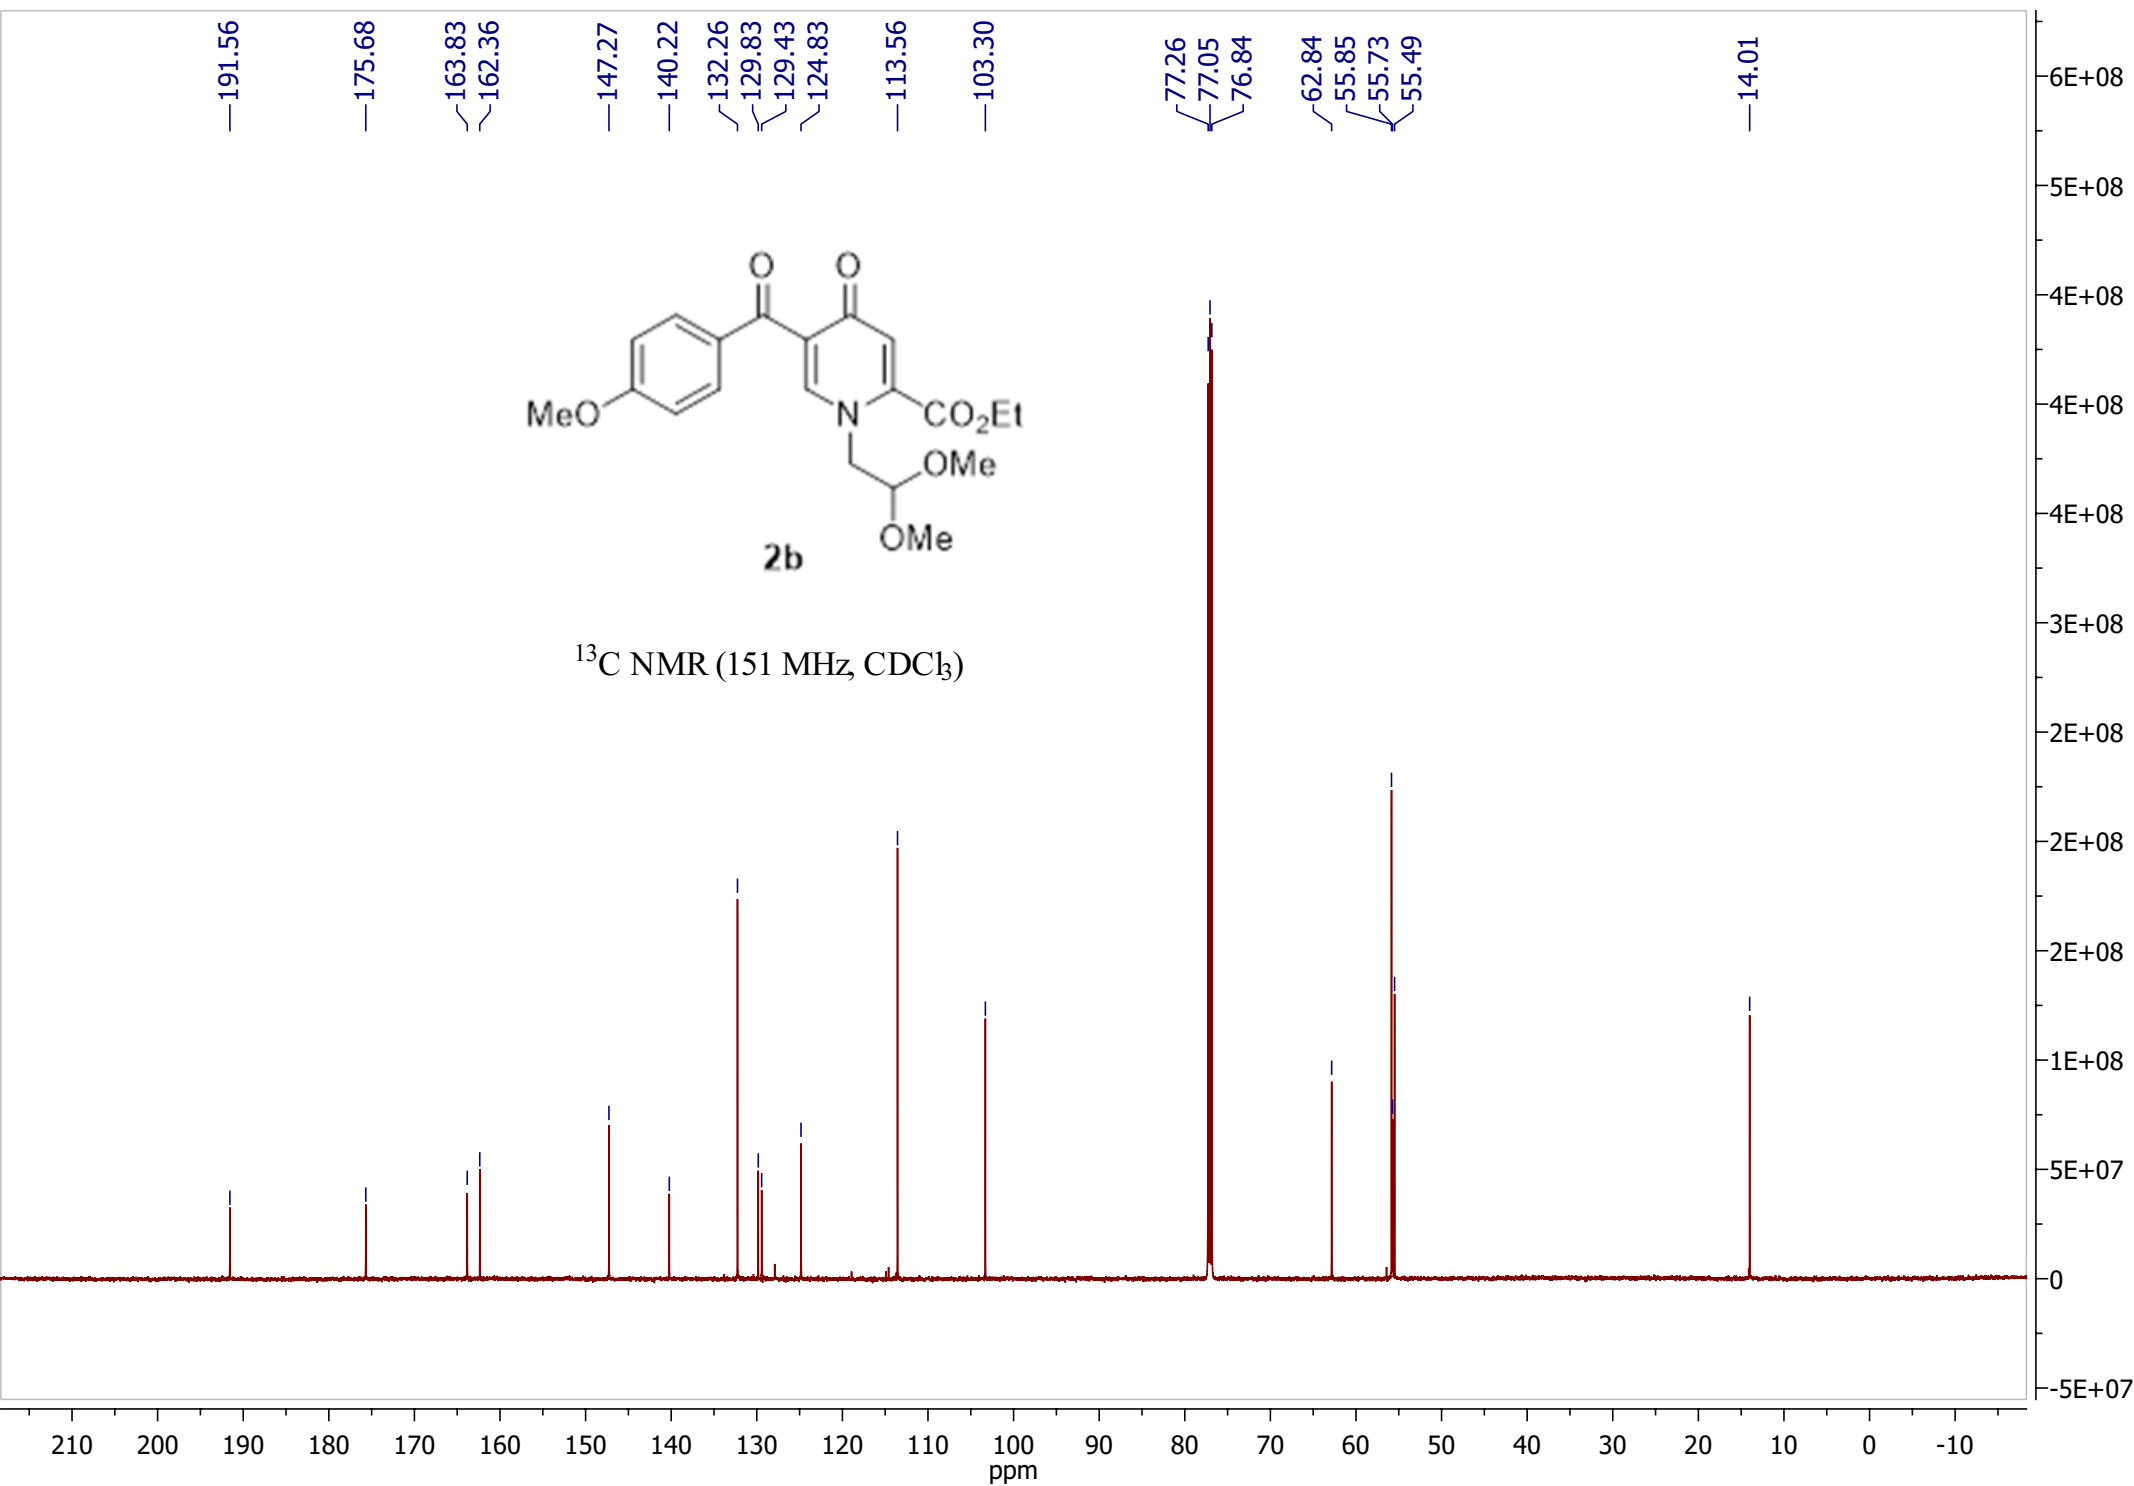

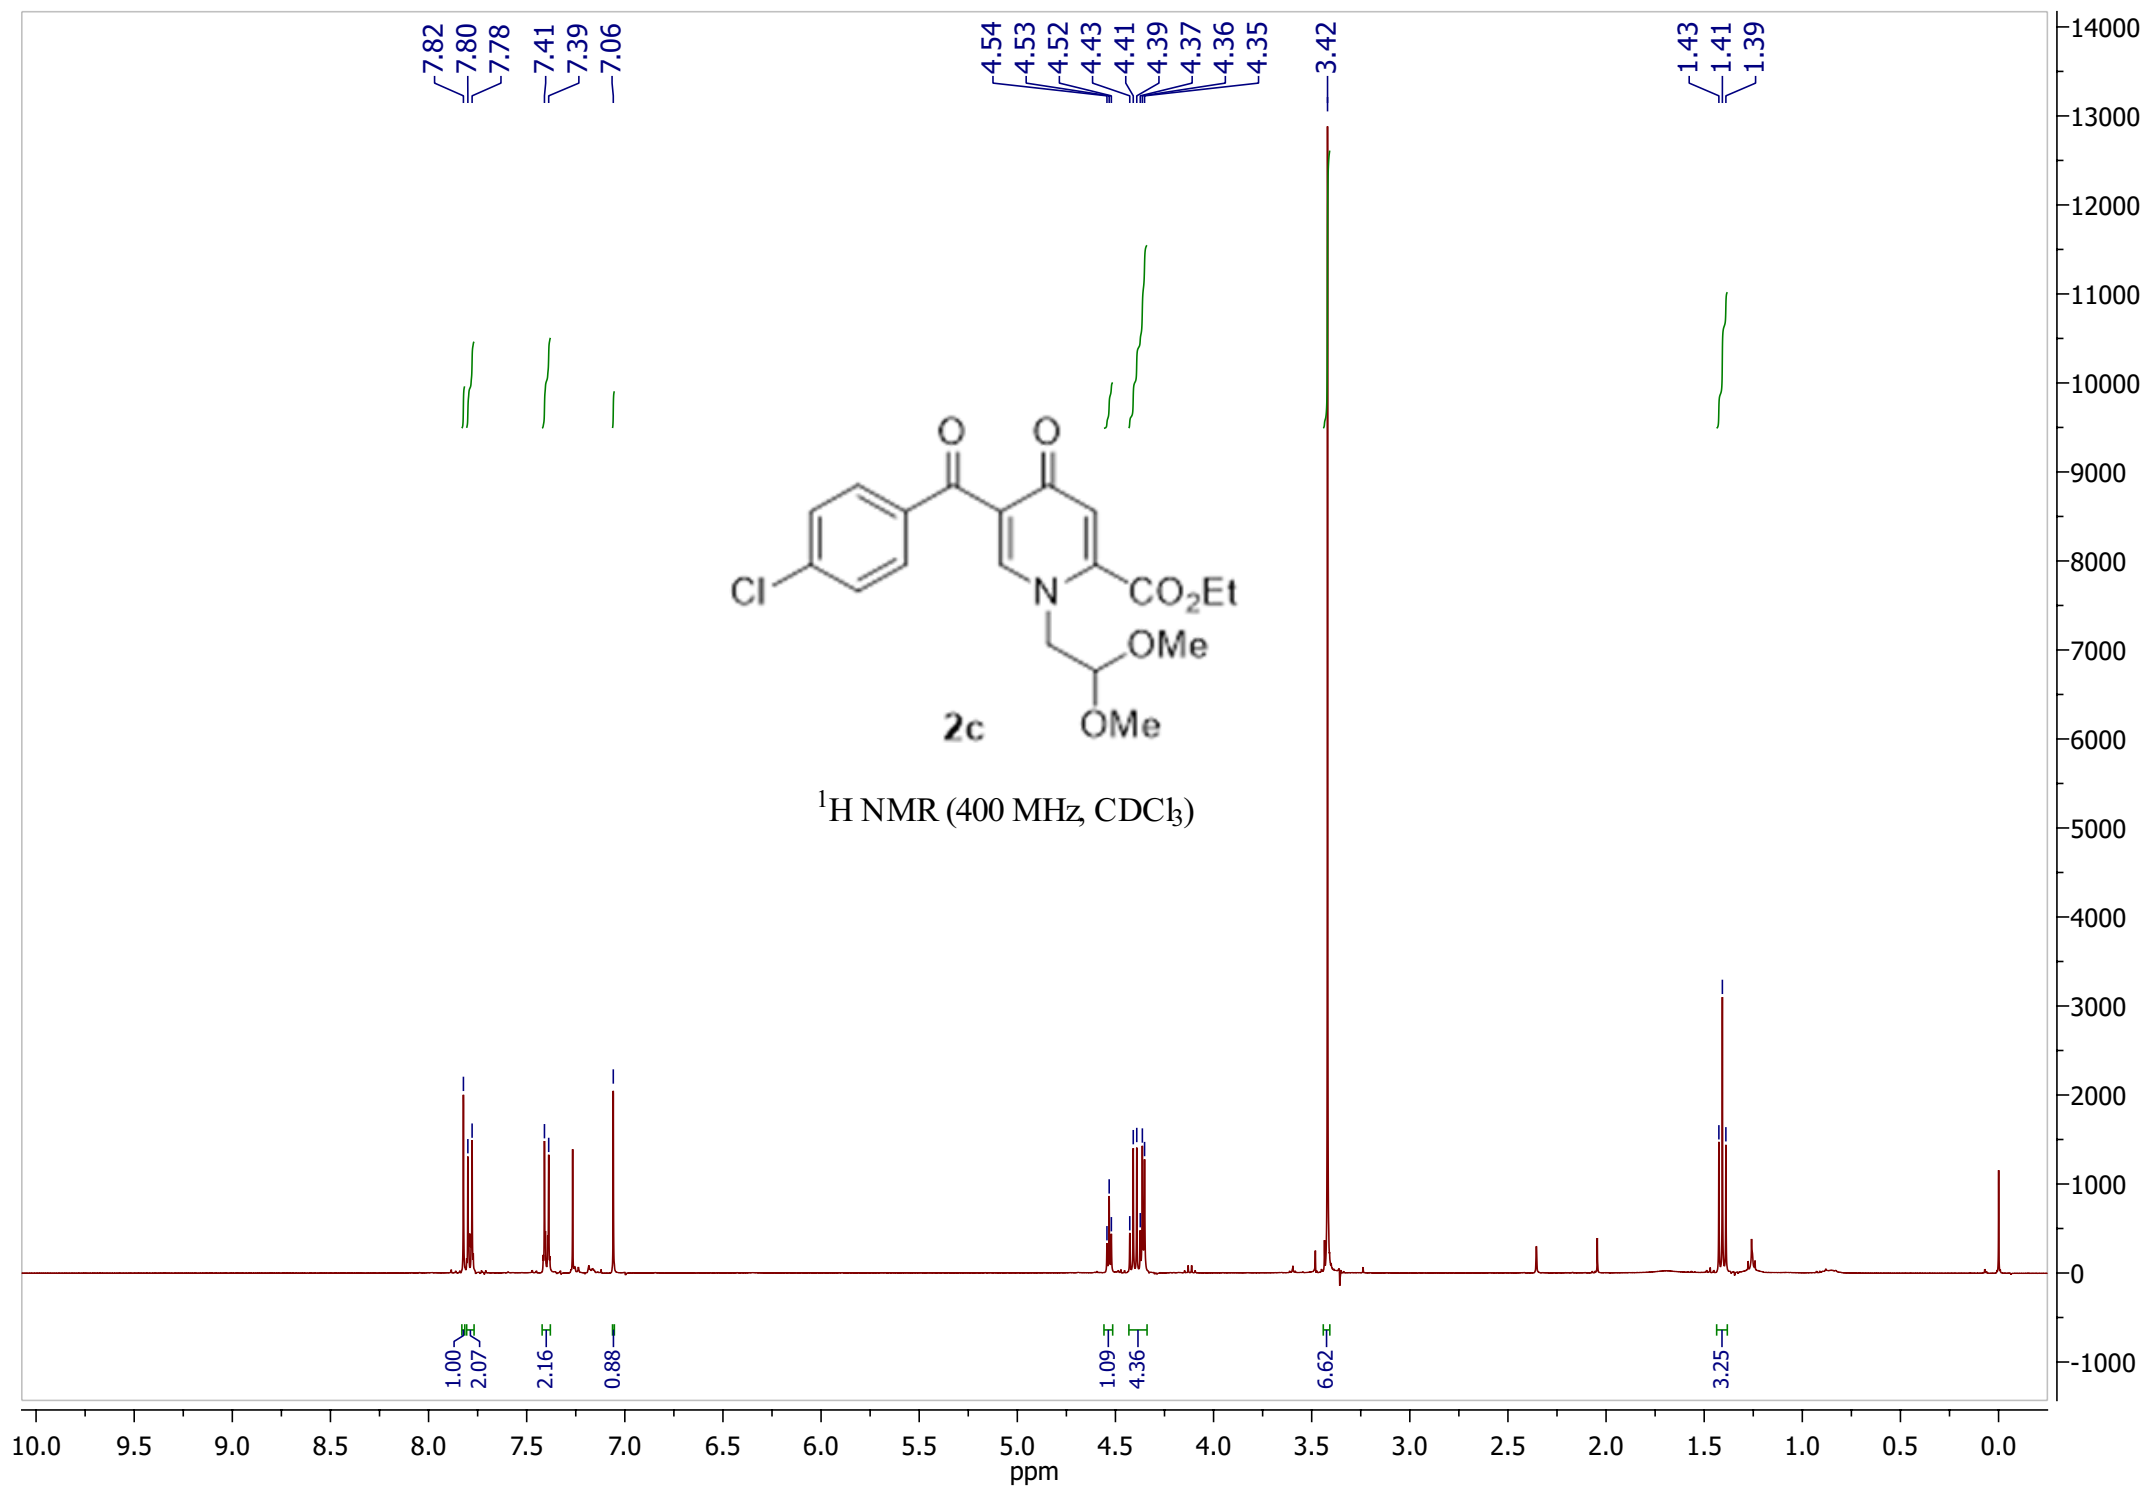

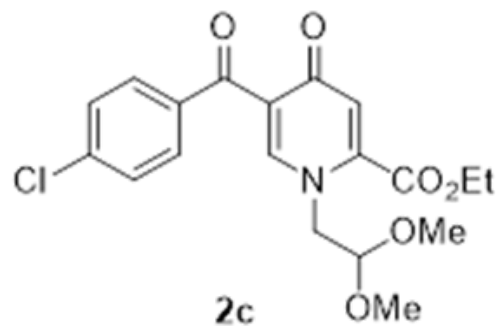

$^{13}\text{C}$  NMR (126 MHz,  $\text{CDCl}_3$ )

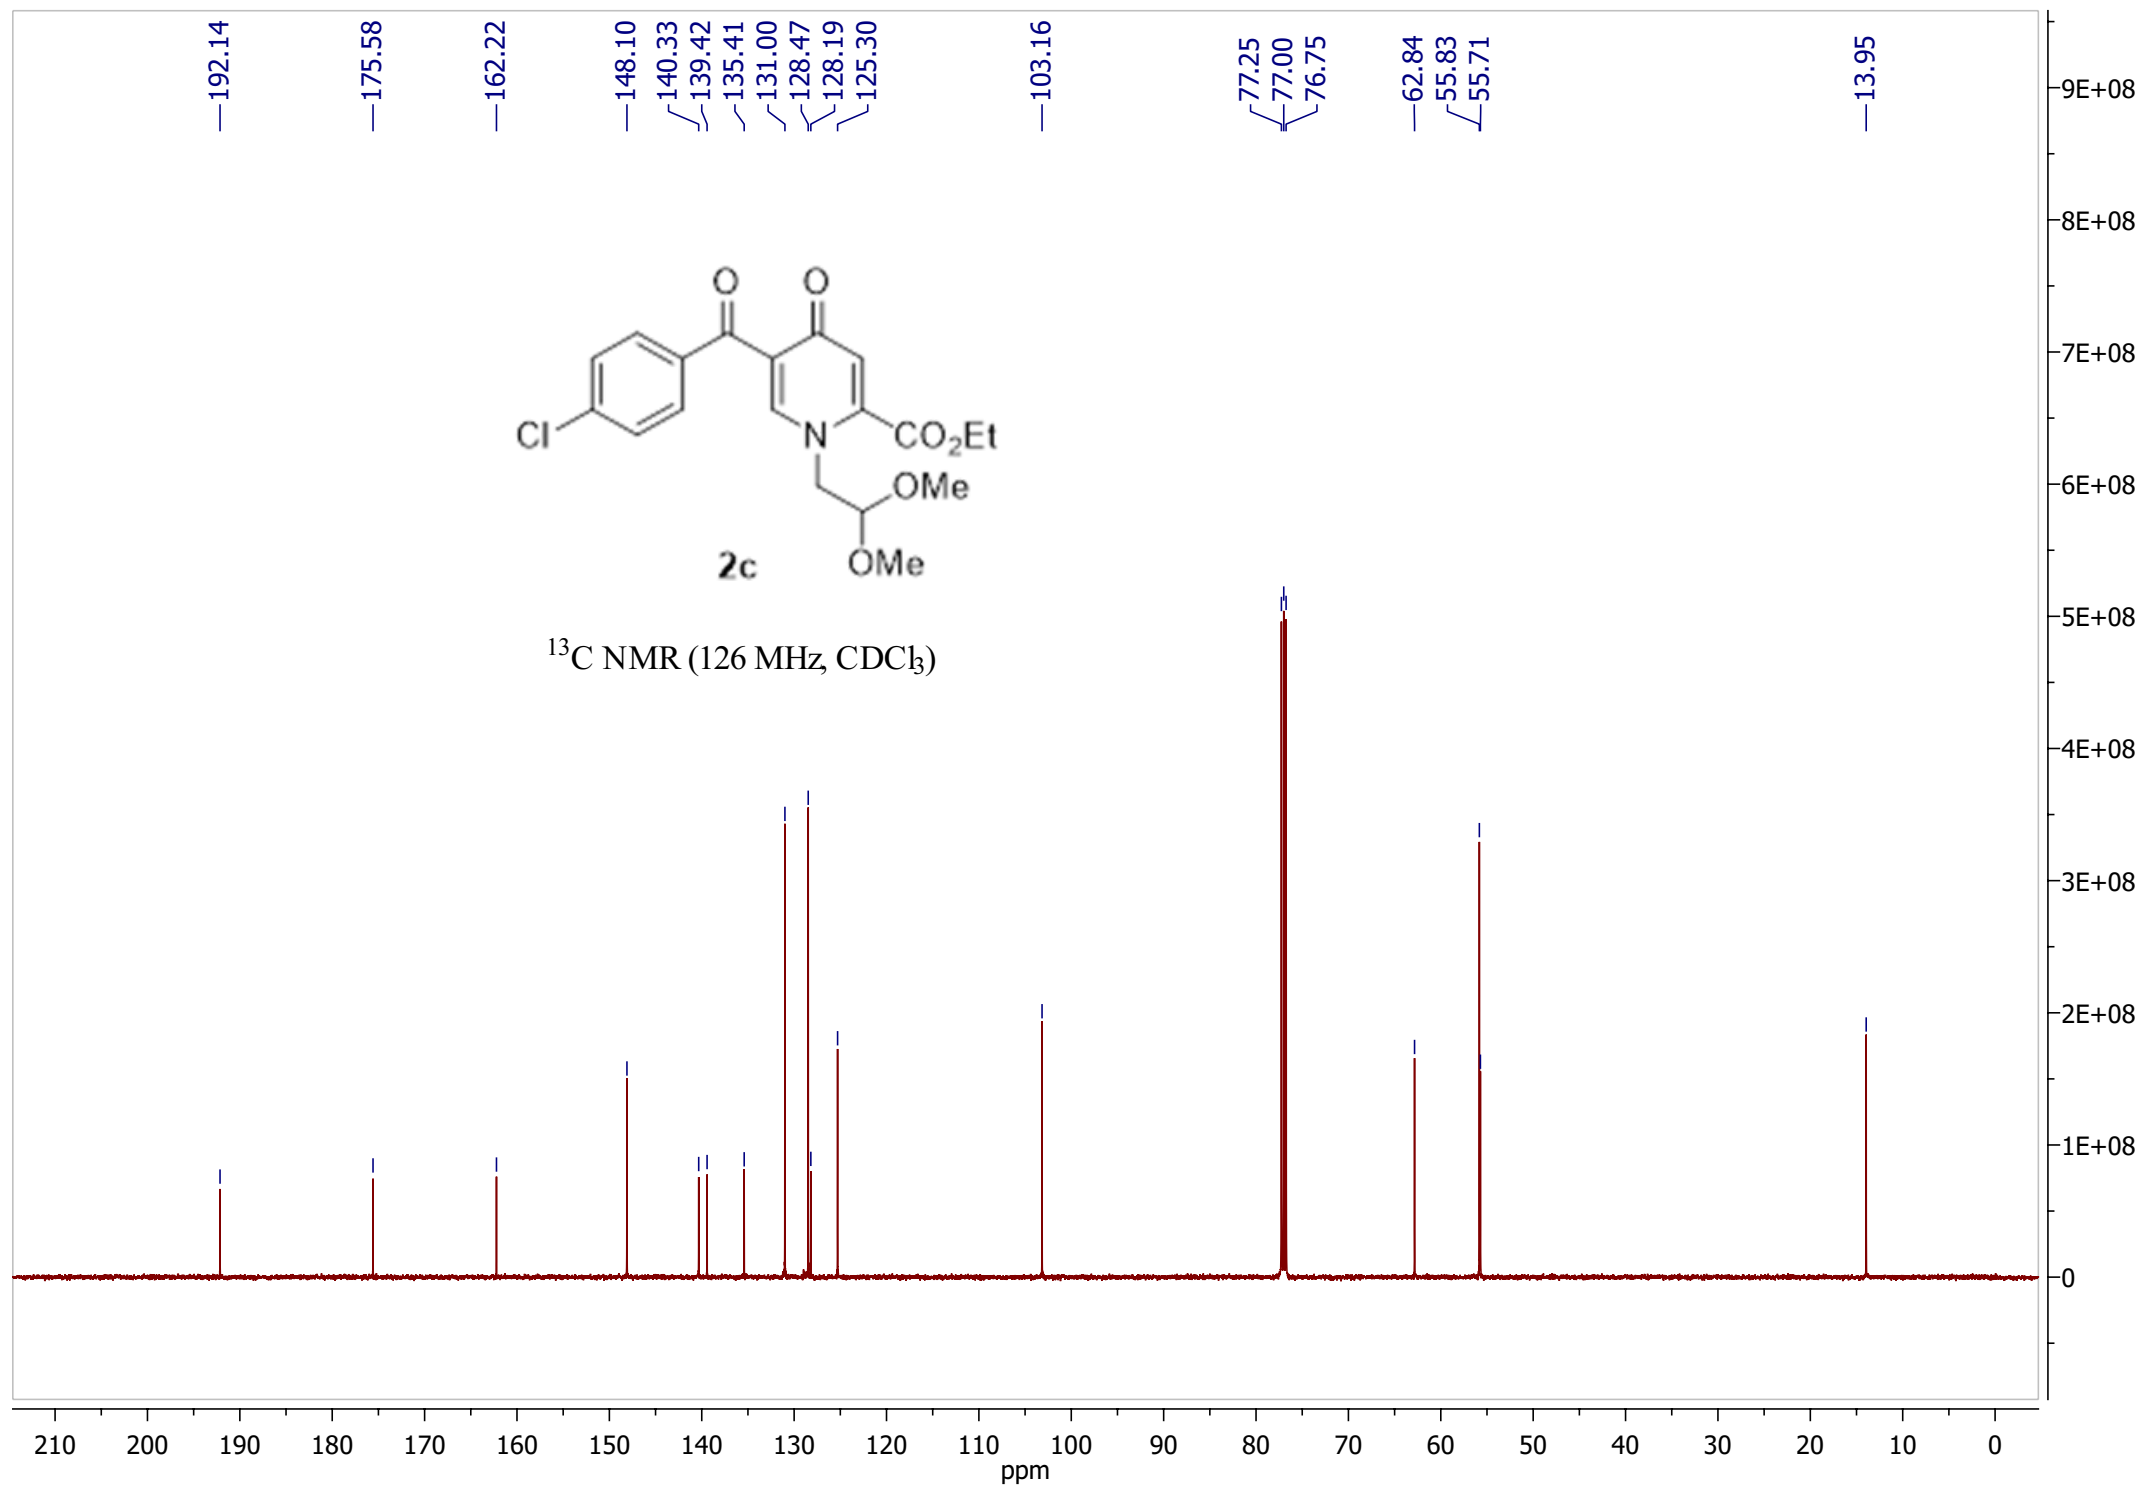

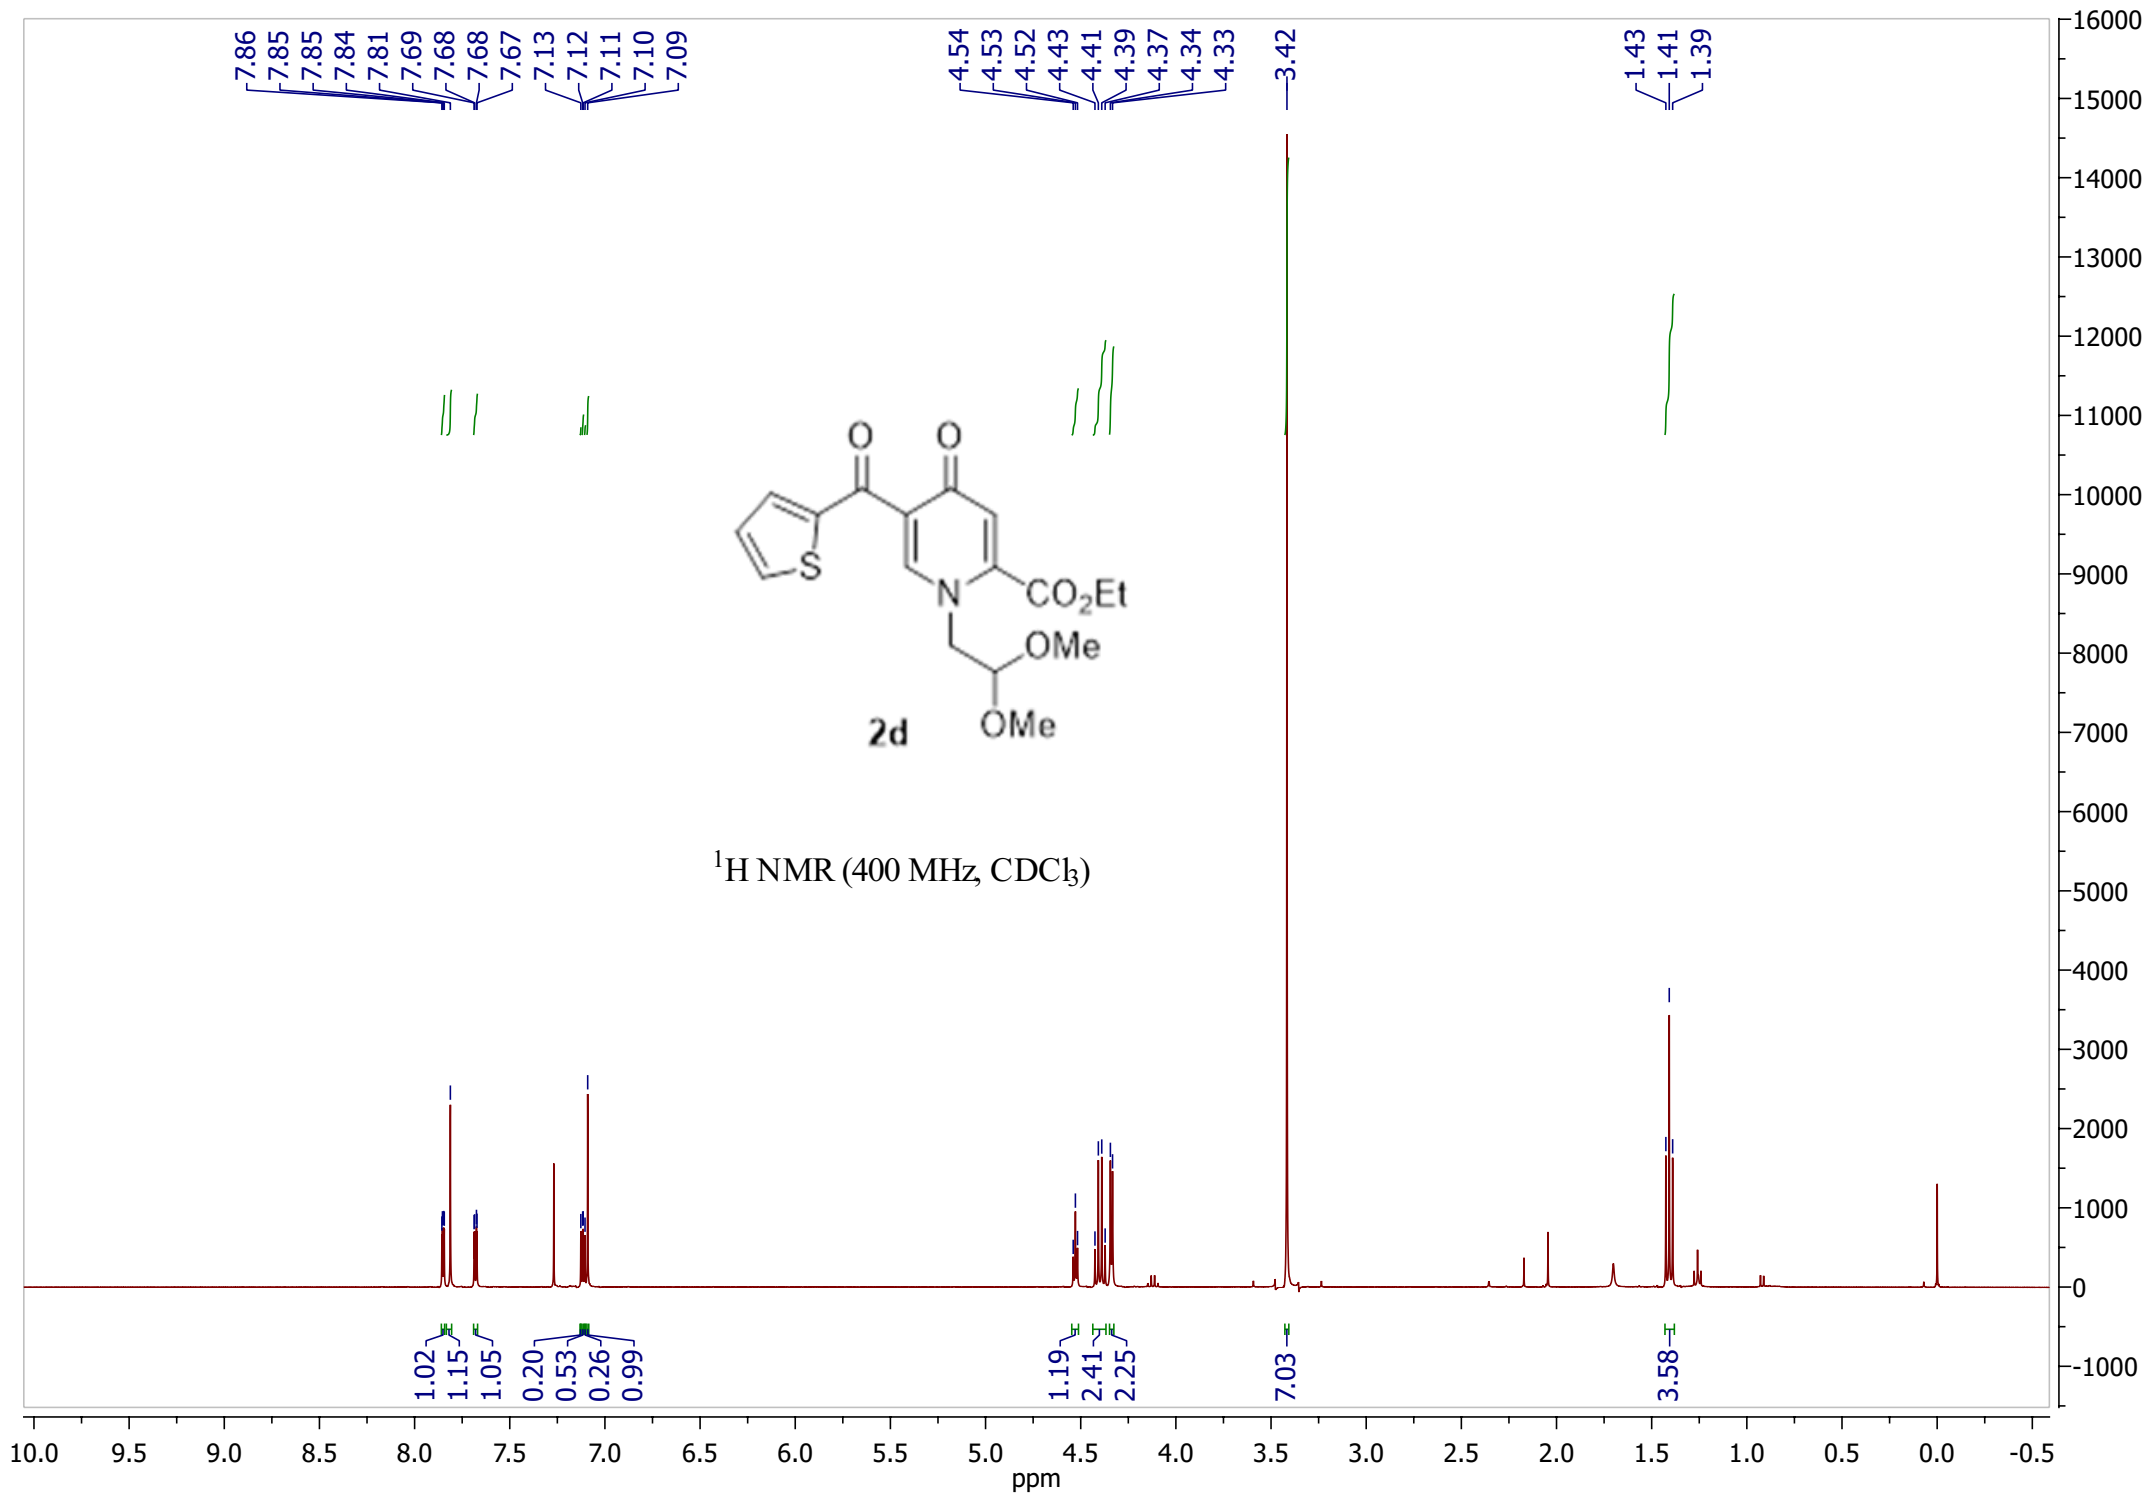

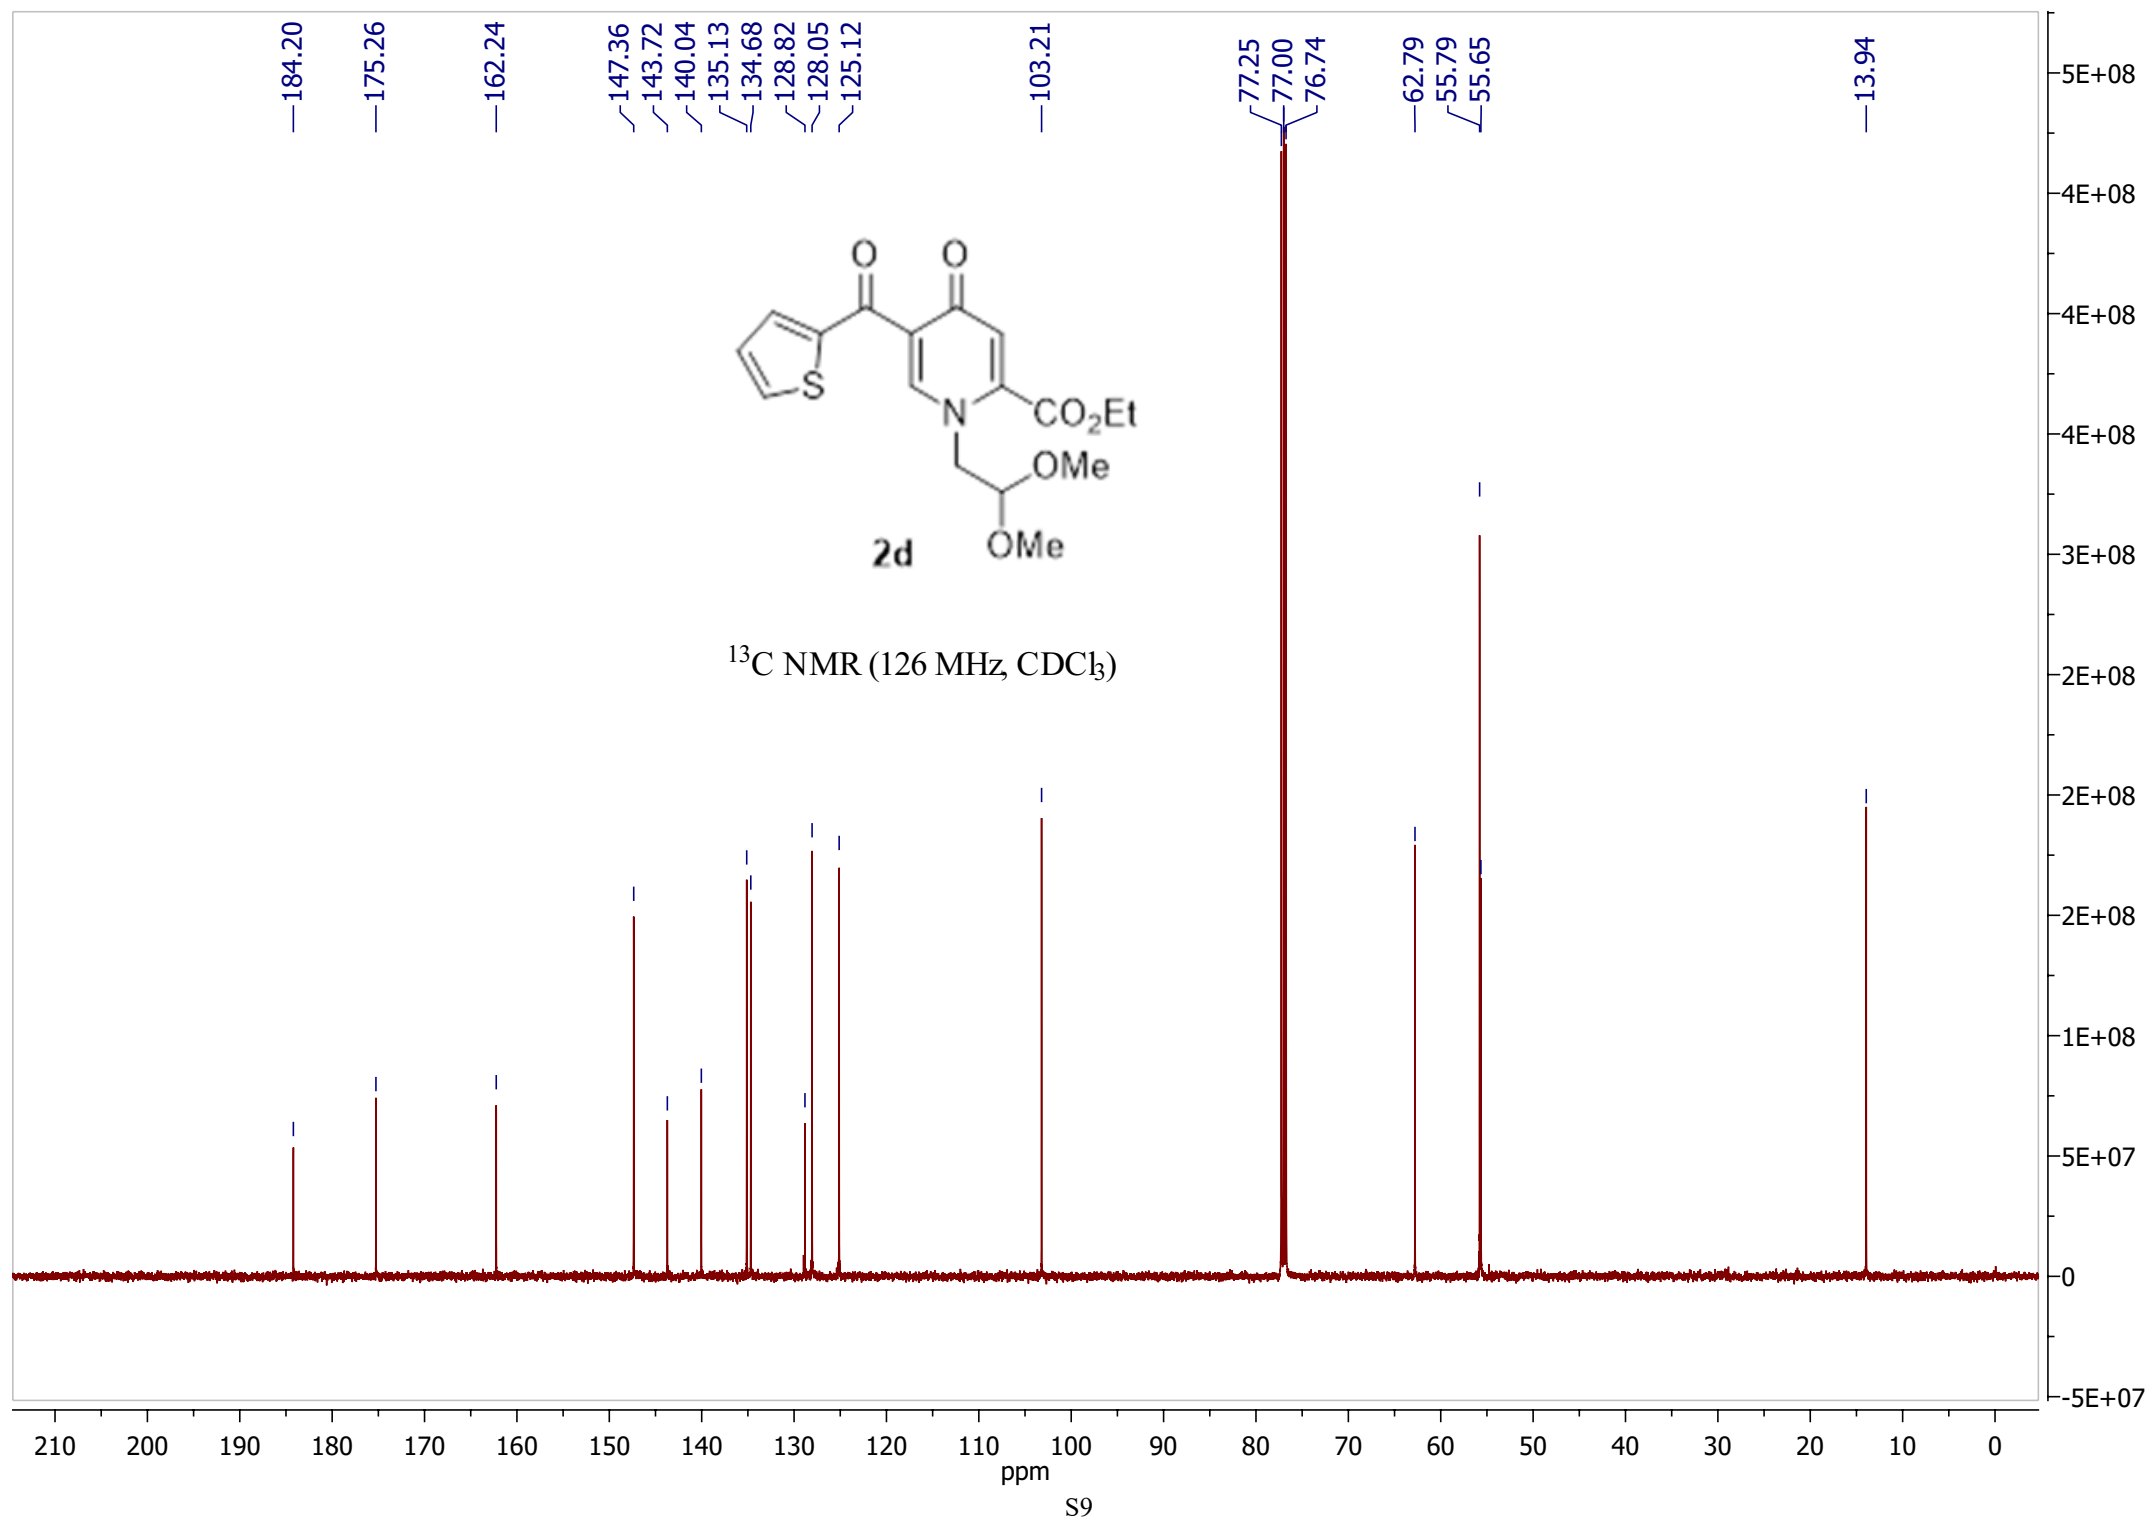

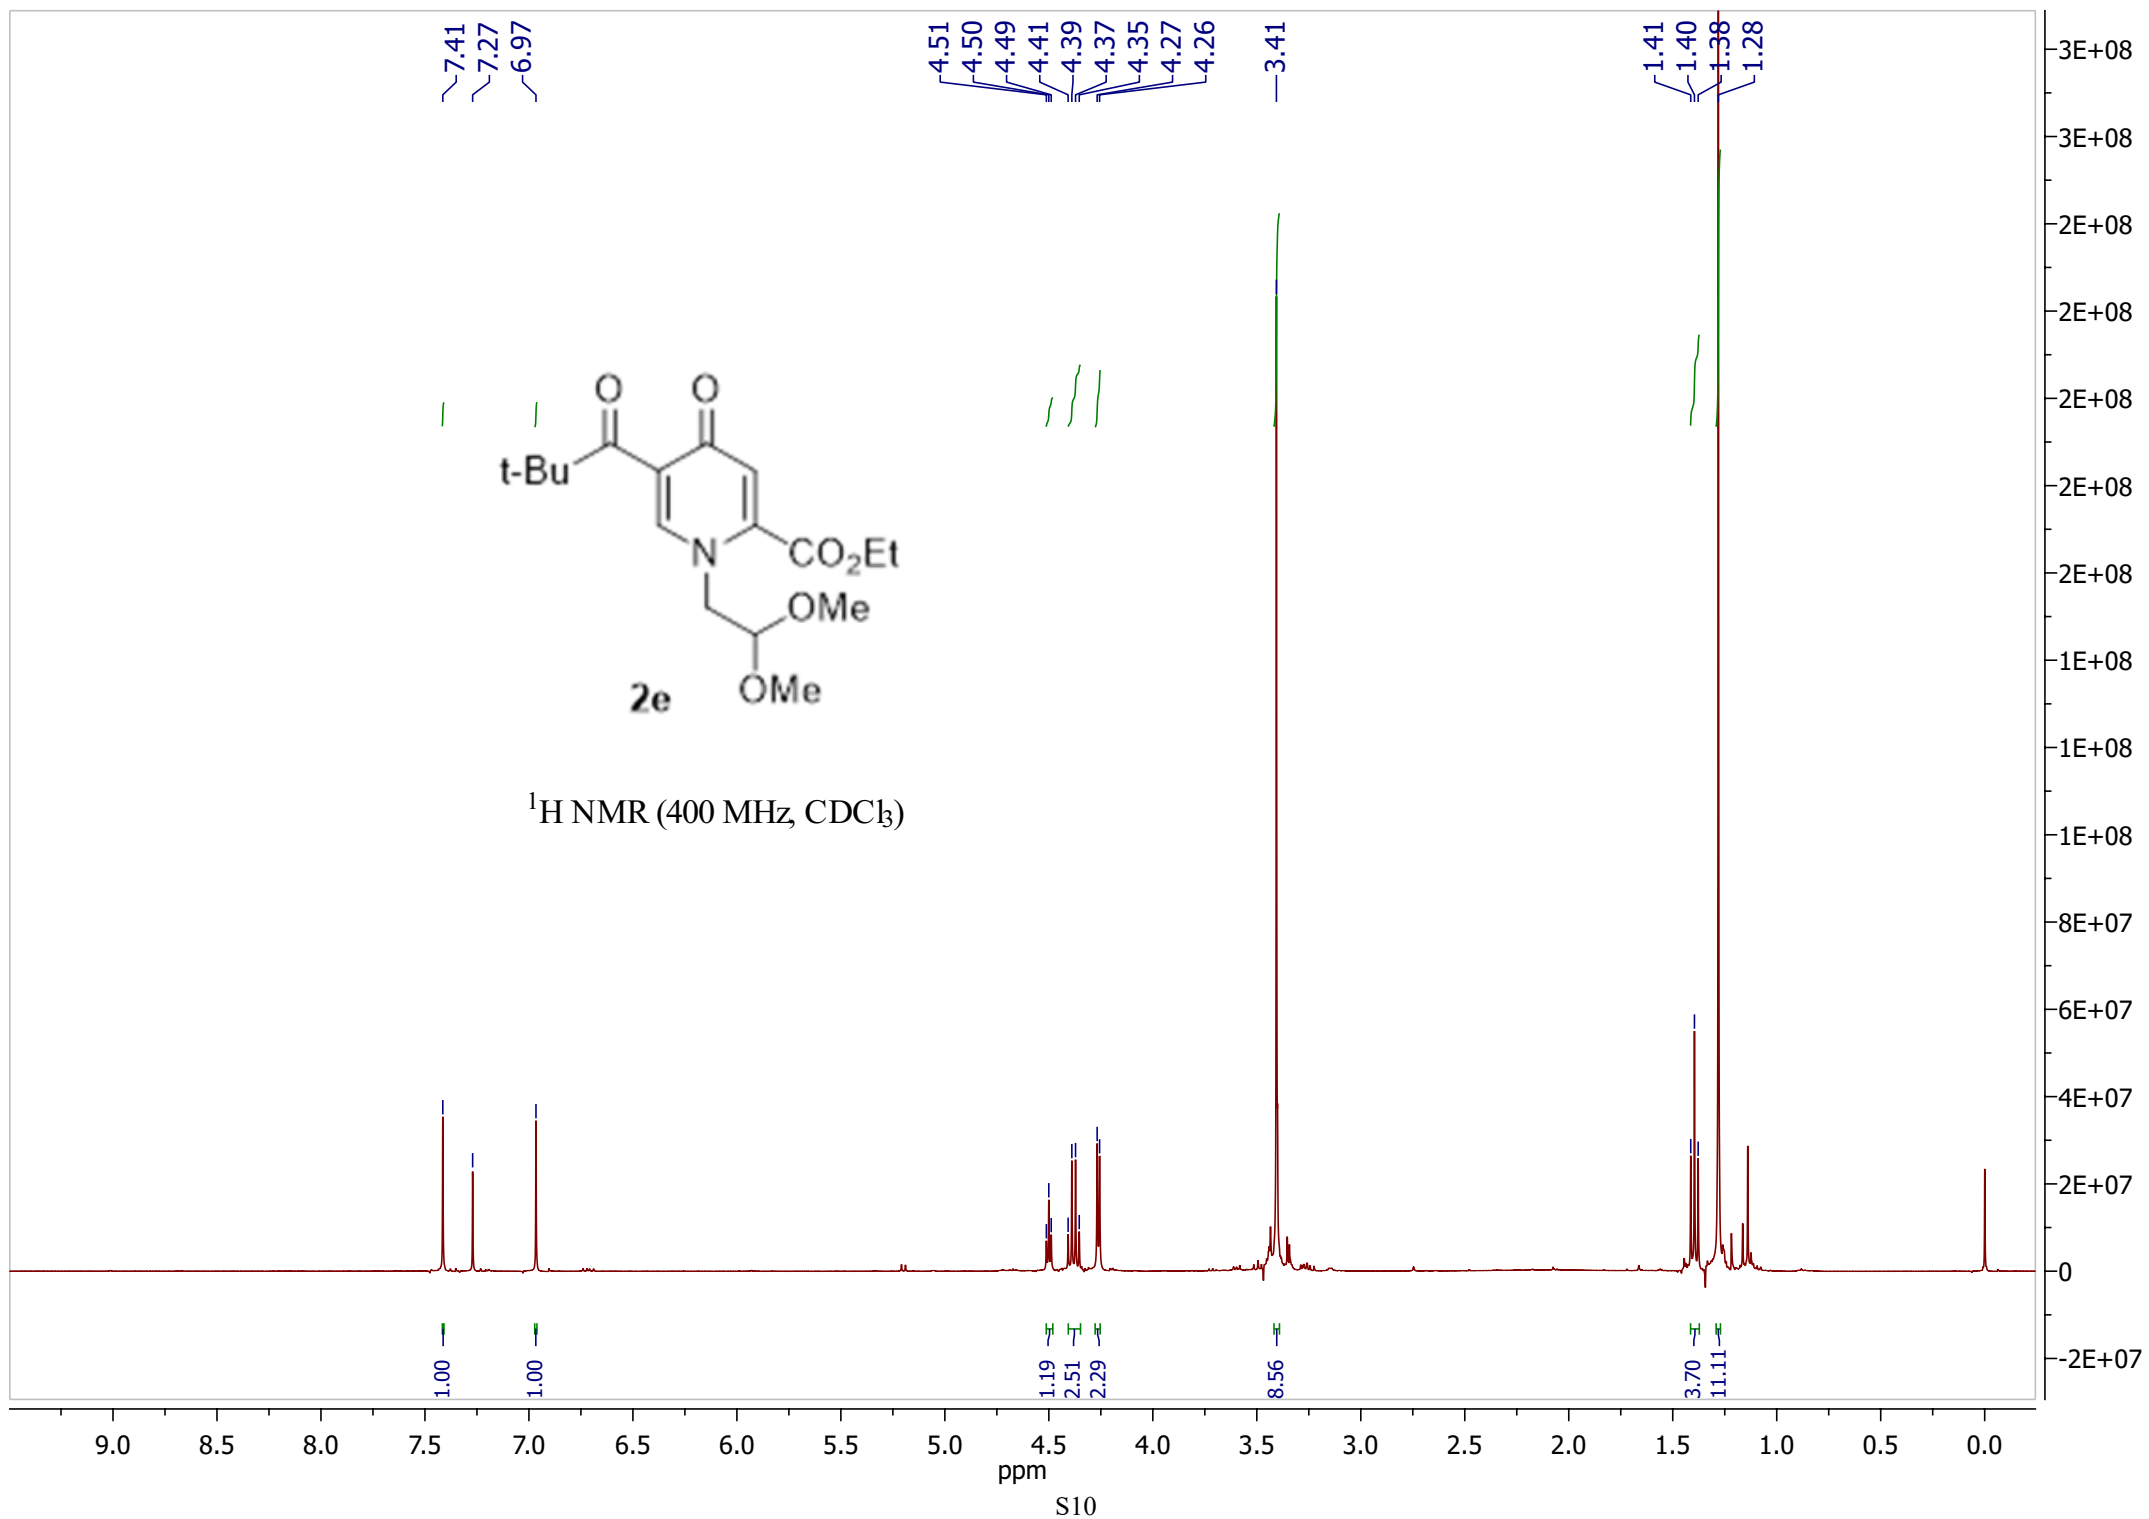

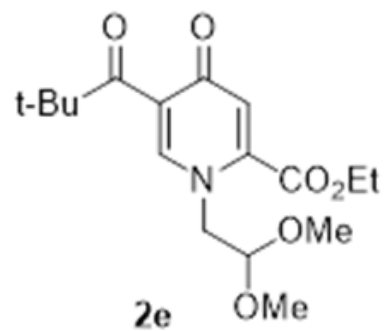

$^{13}\text{C}$  NMR (126 MHz,  $\text{CDCl}_3$ )

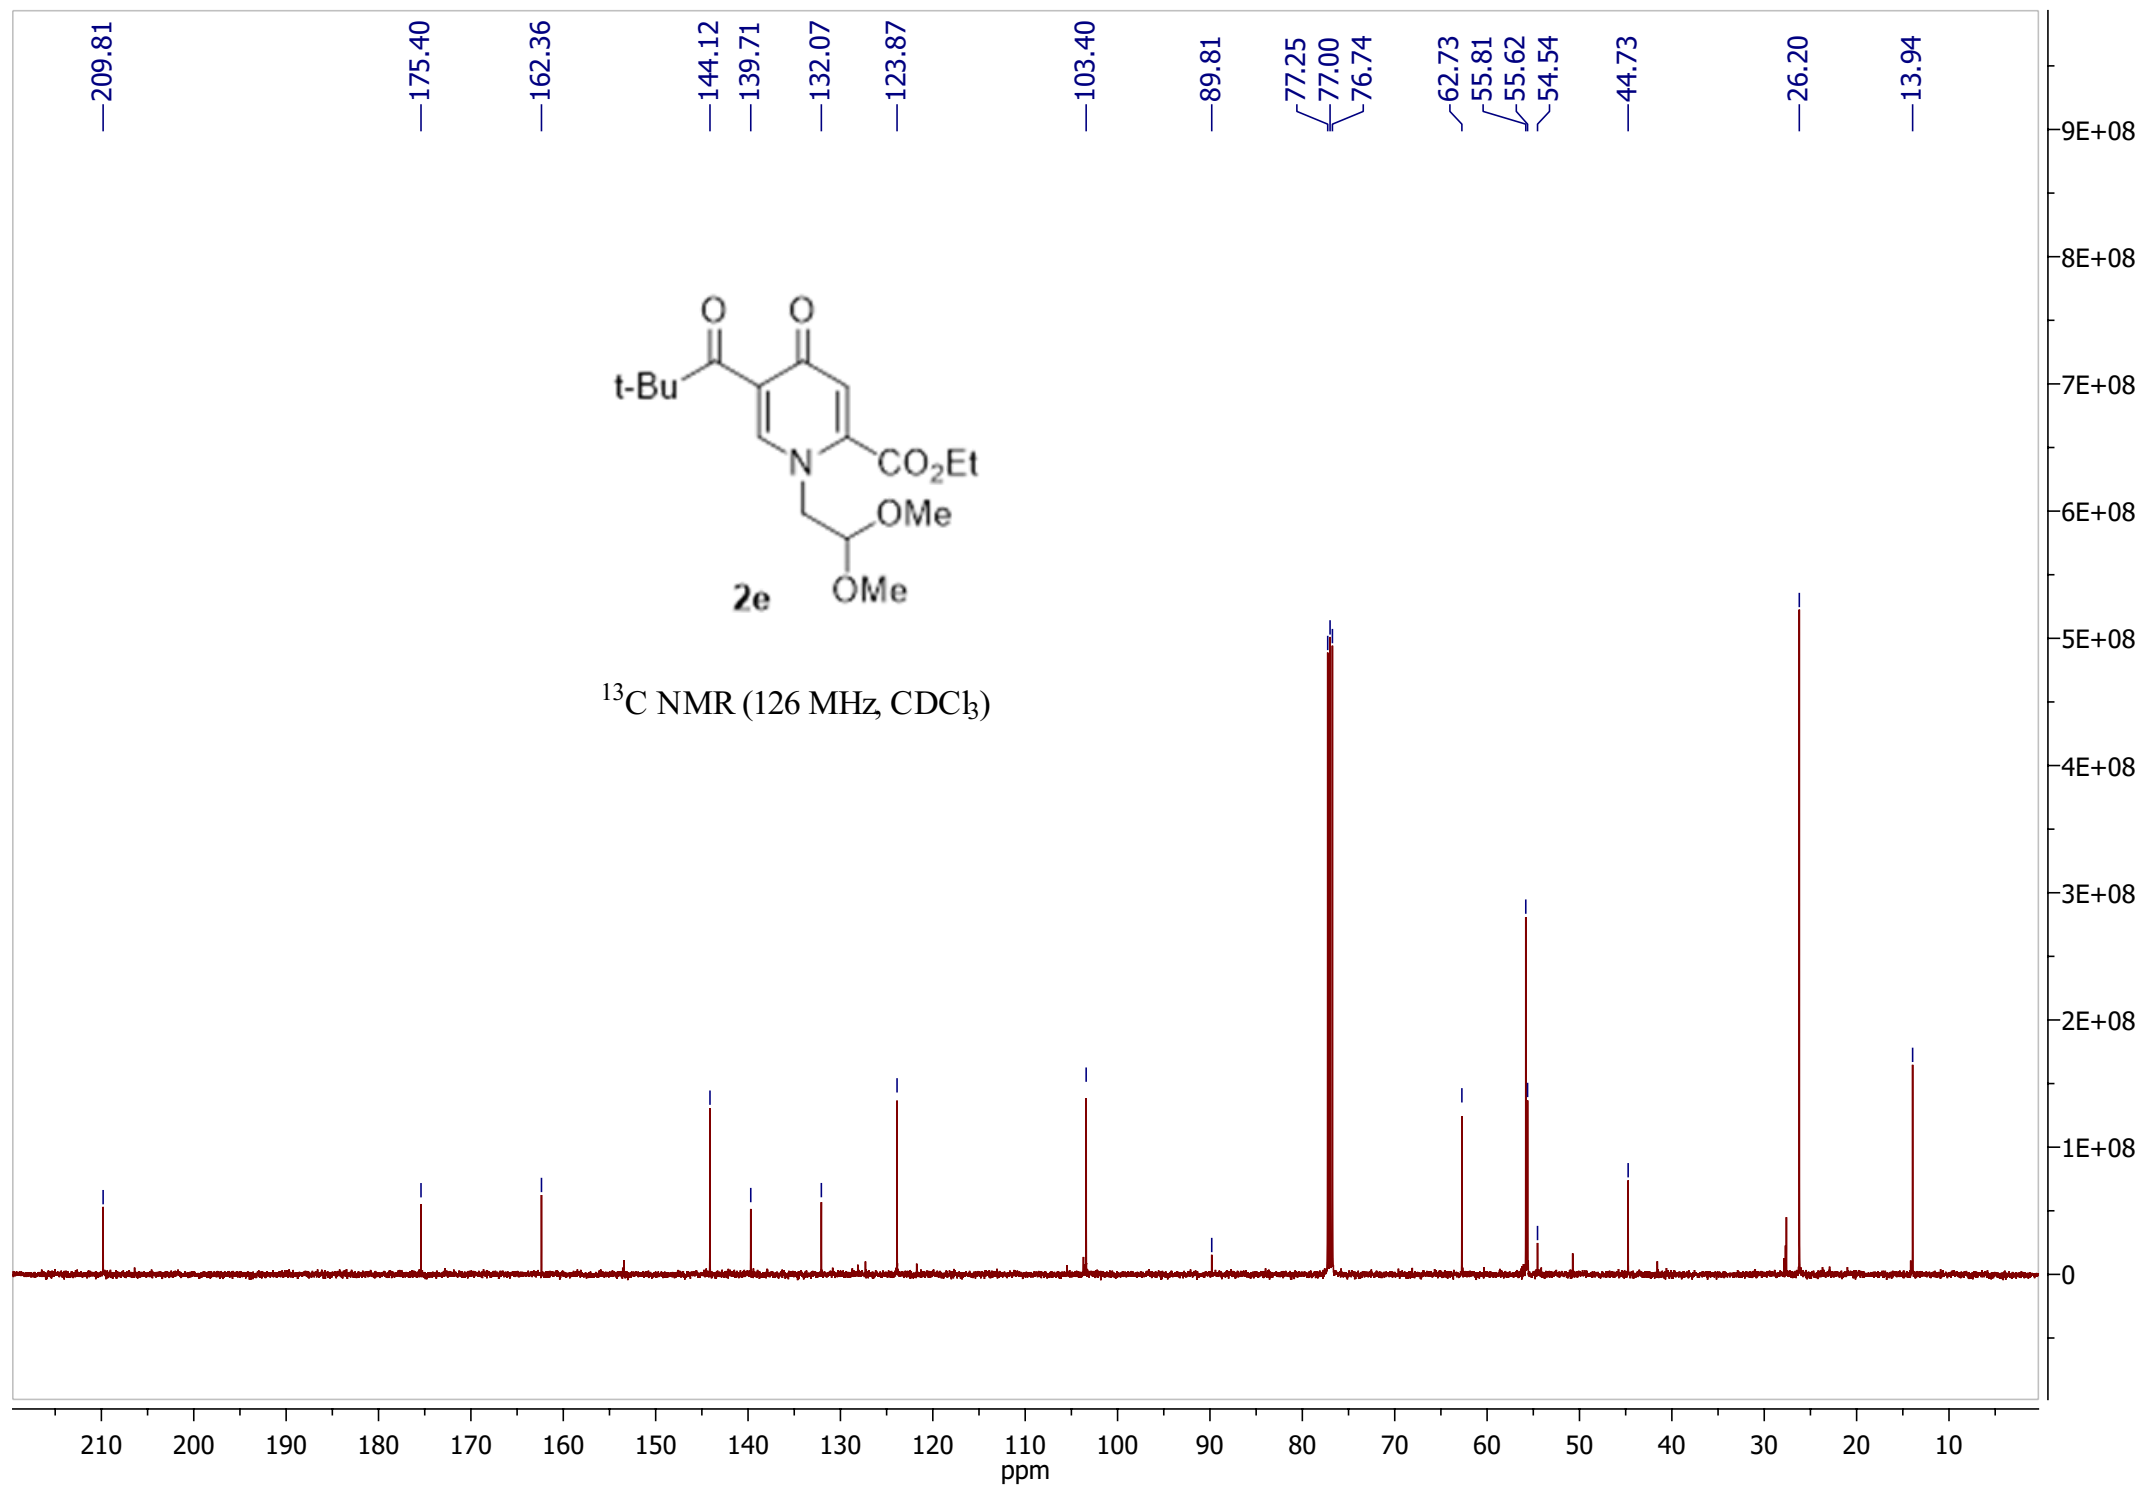

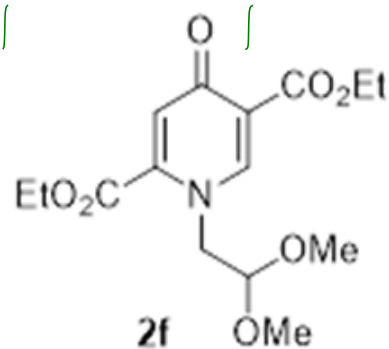

$^1\text{H}$  NMR (400 MHz,  $\text{CDCl}_3$ )

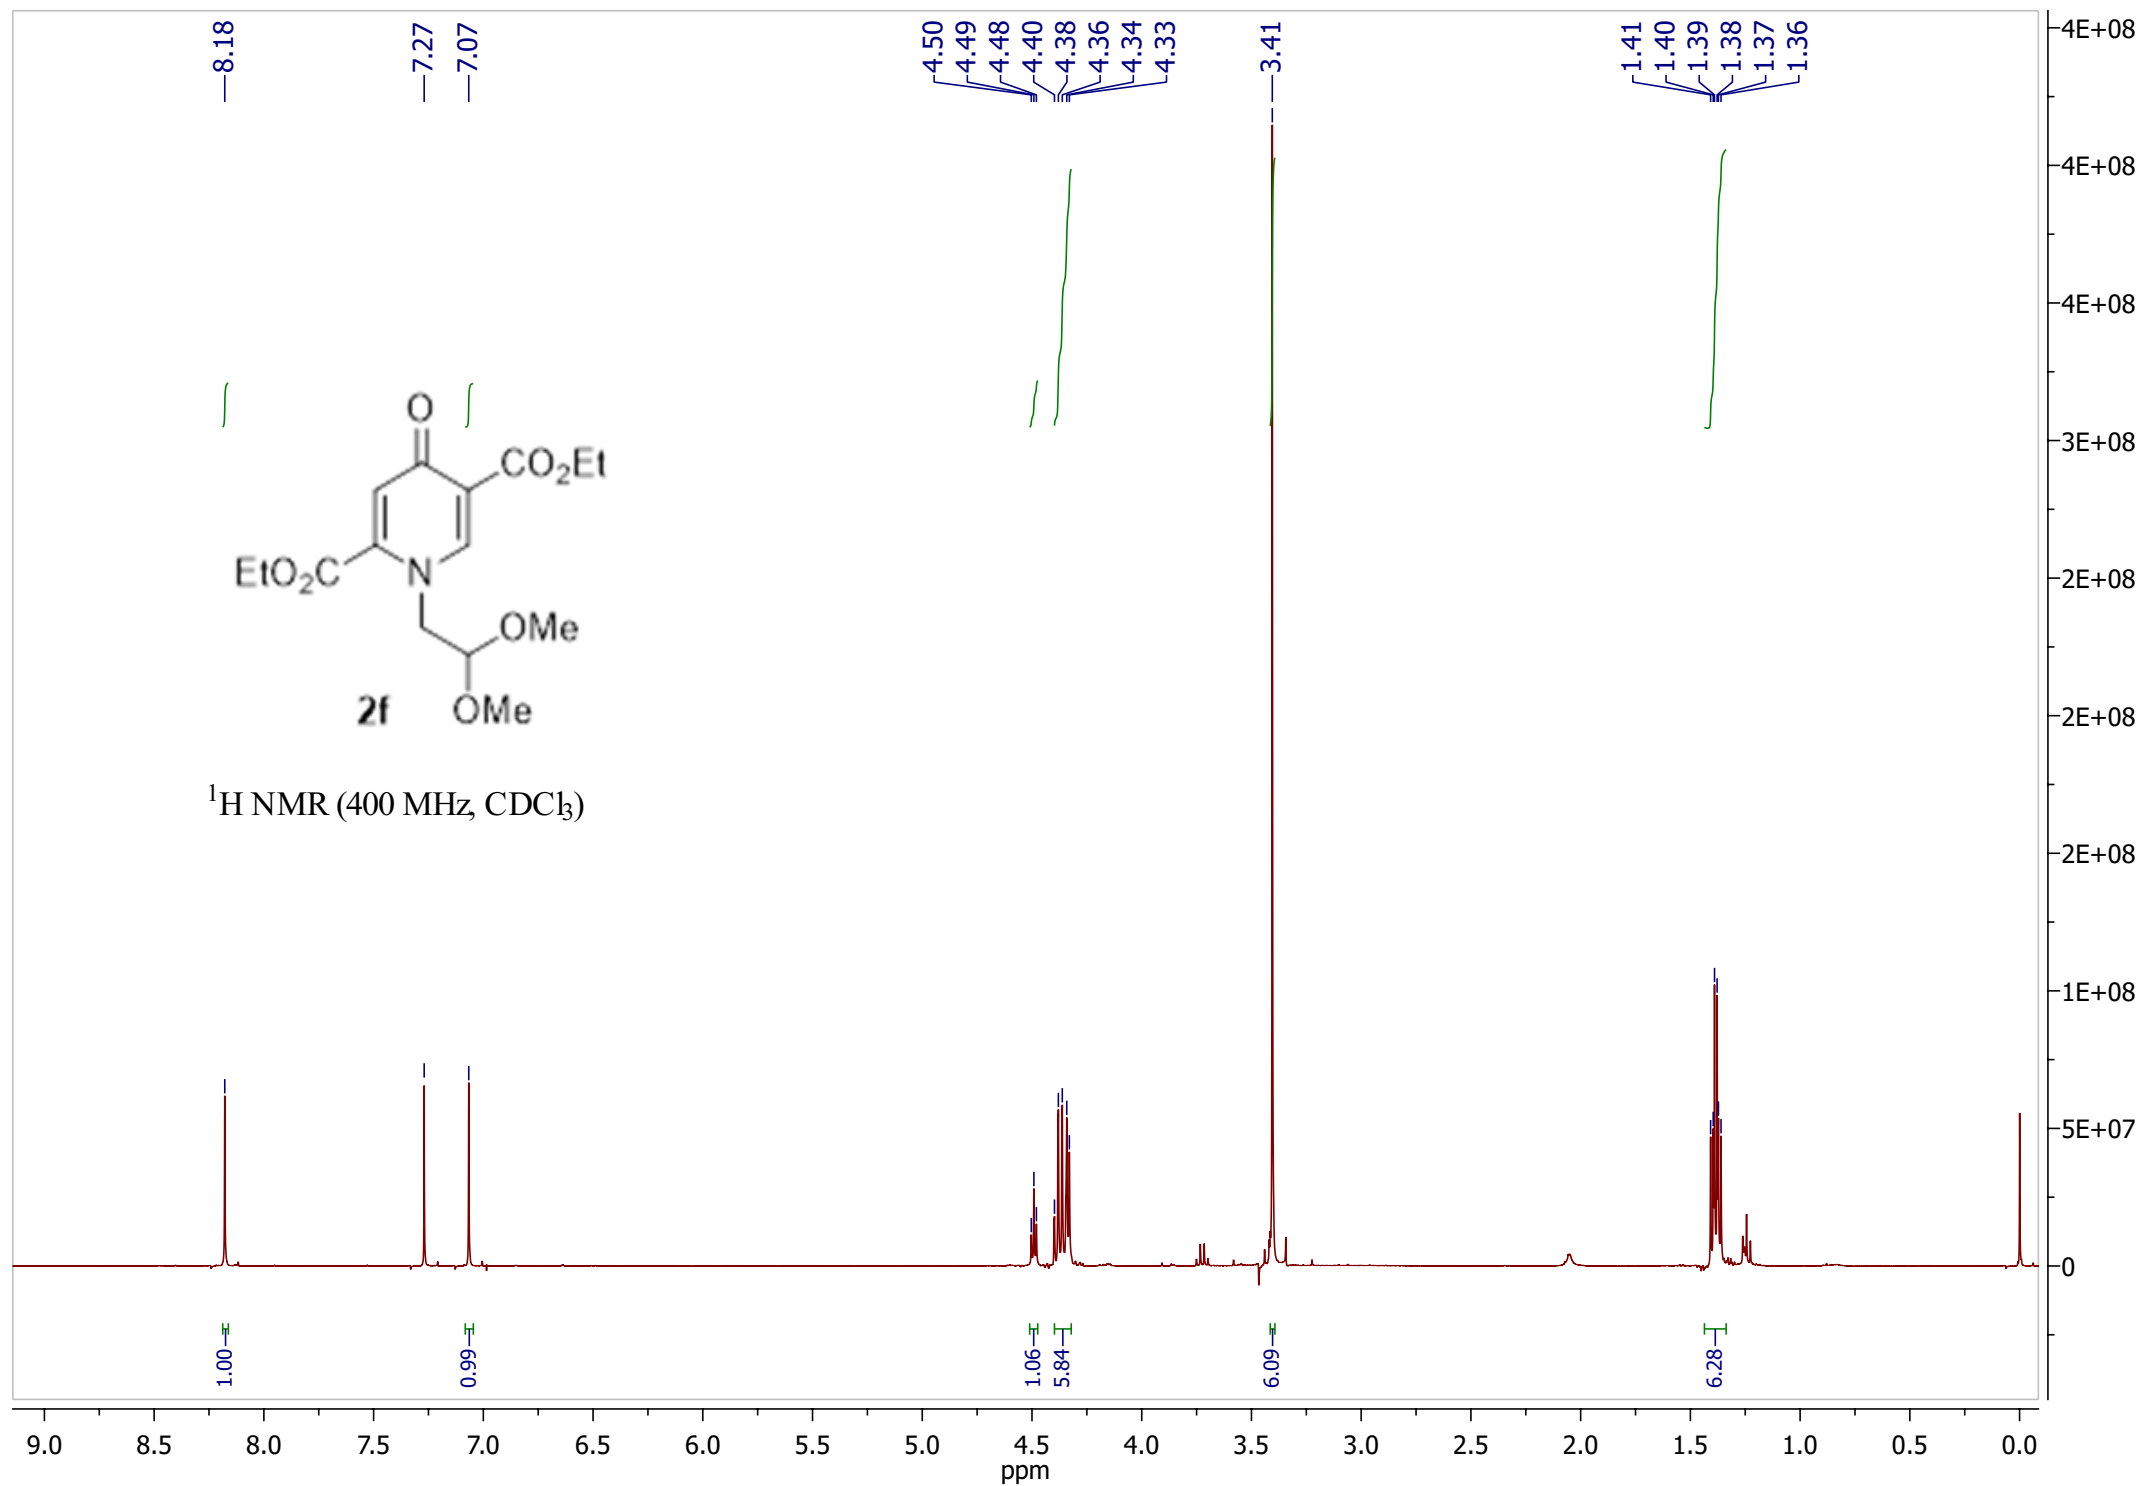



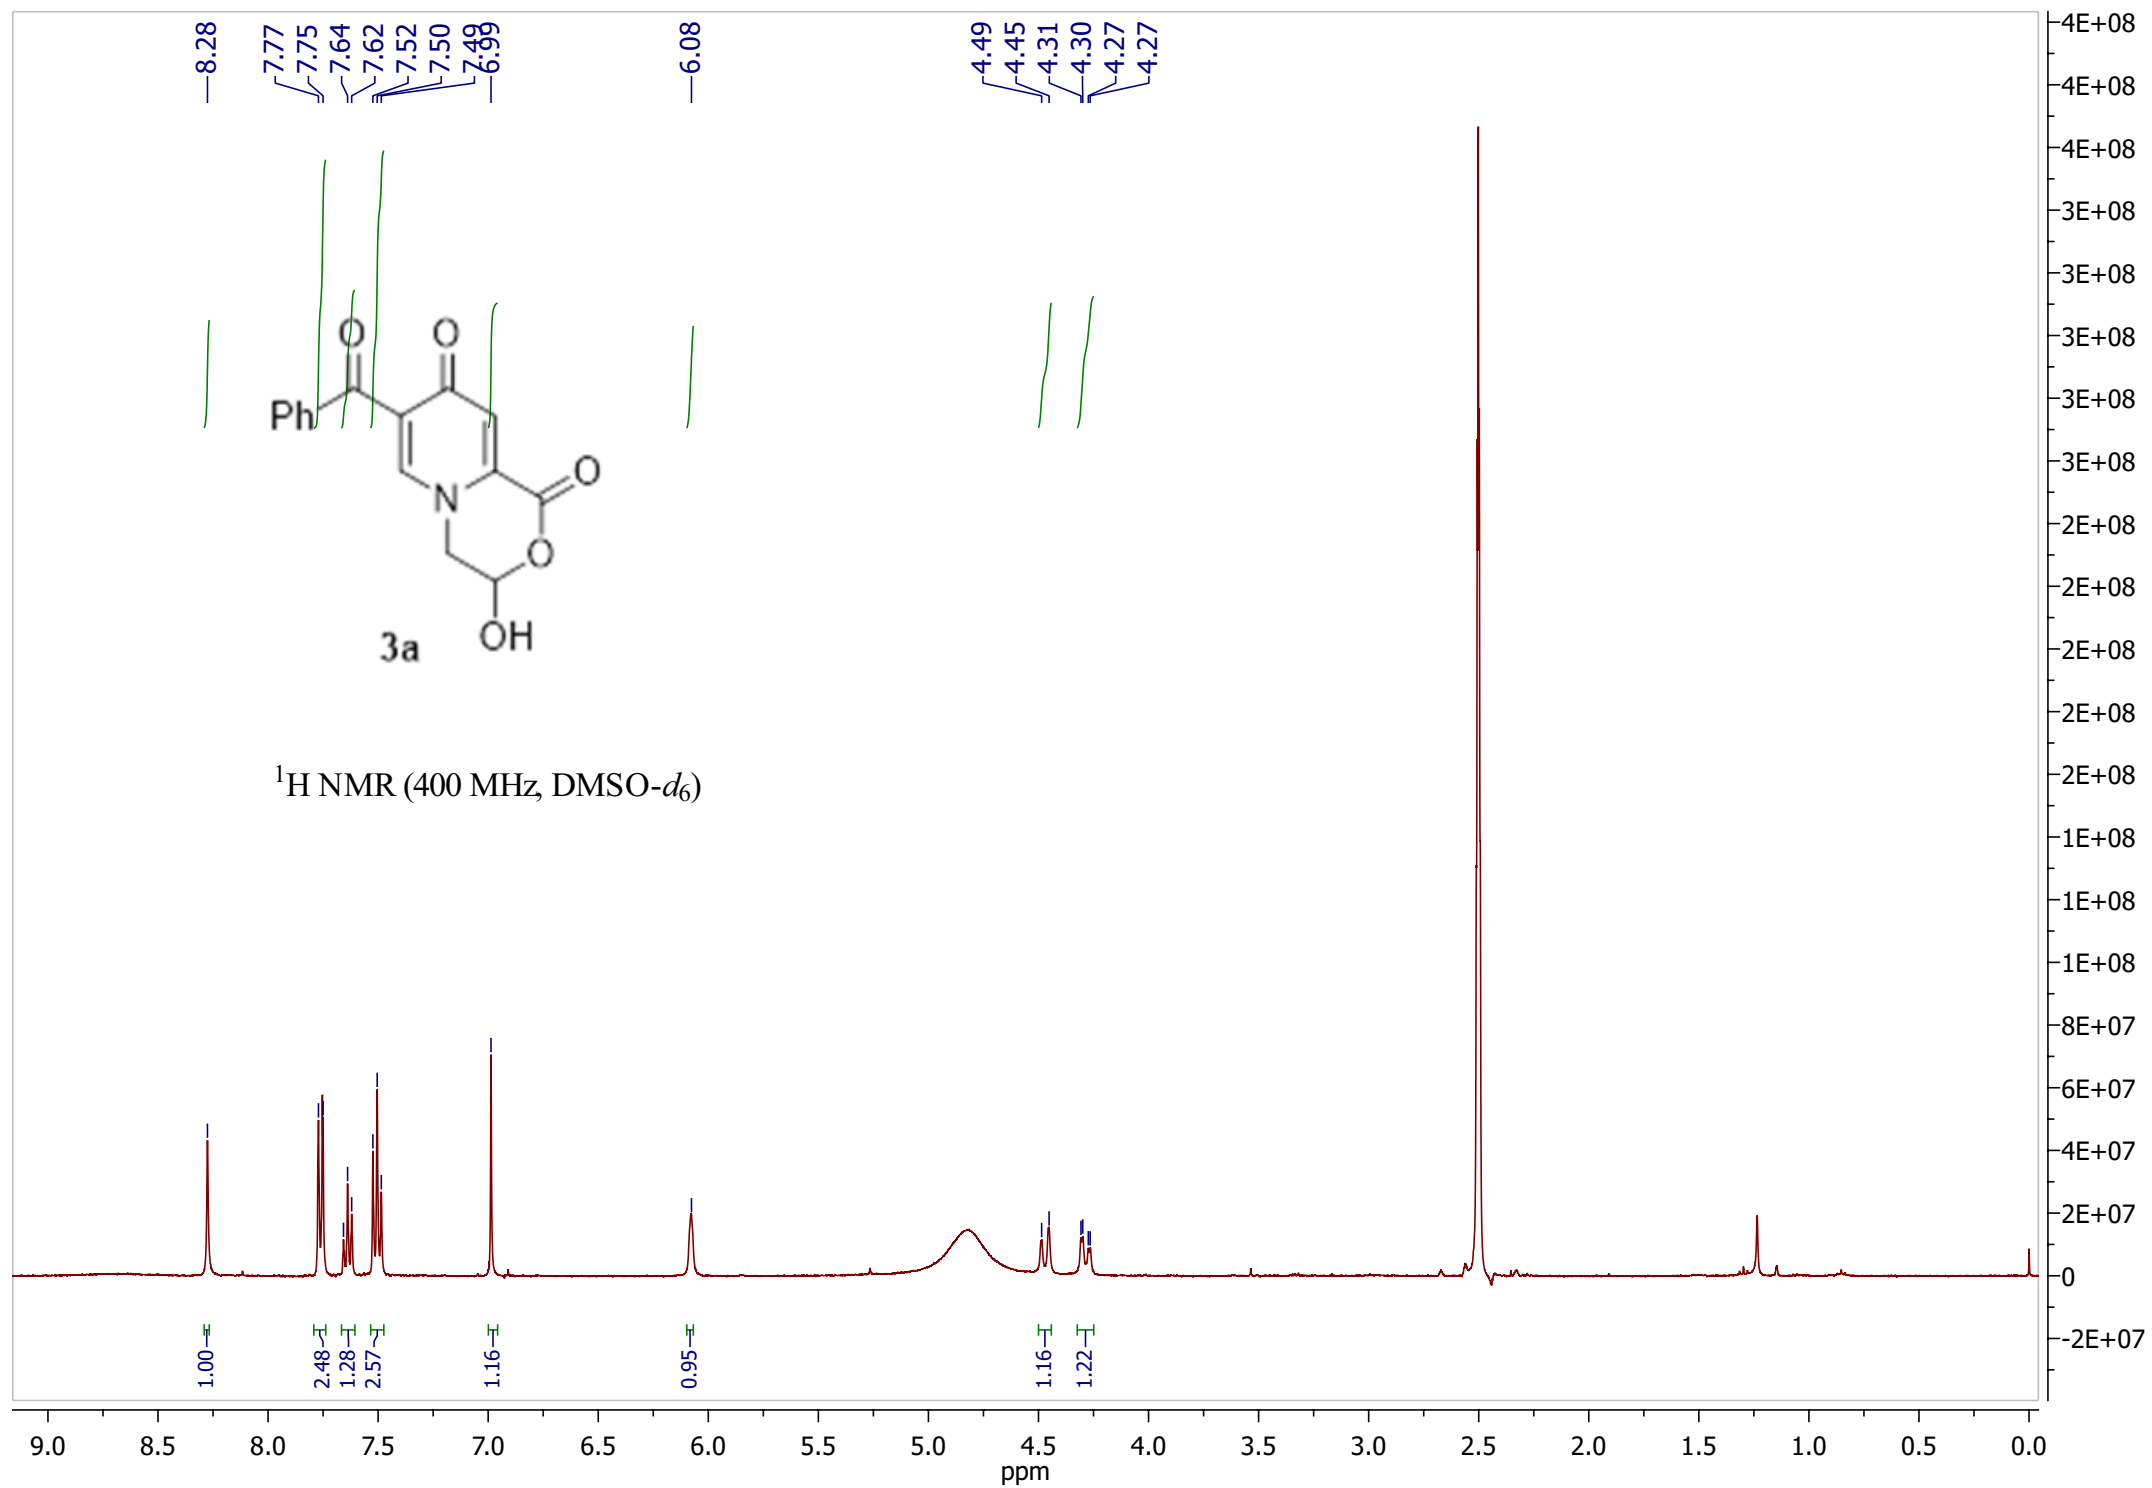

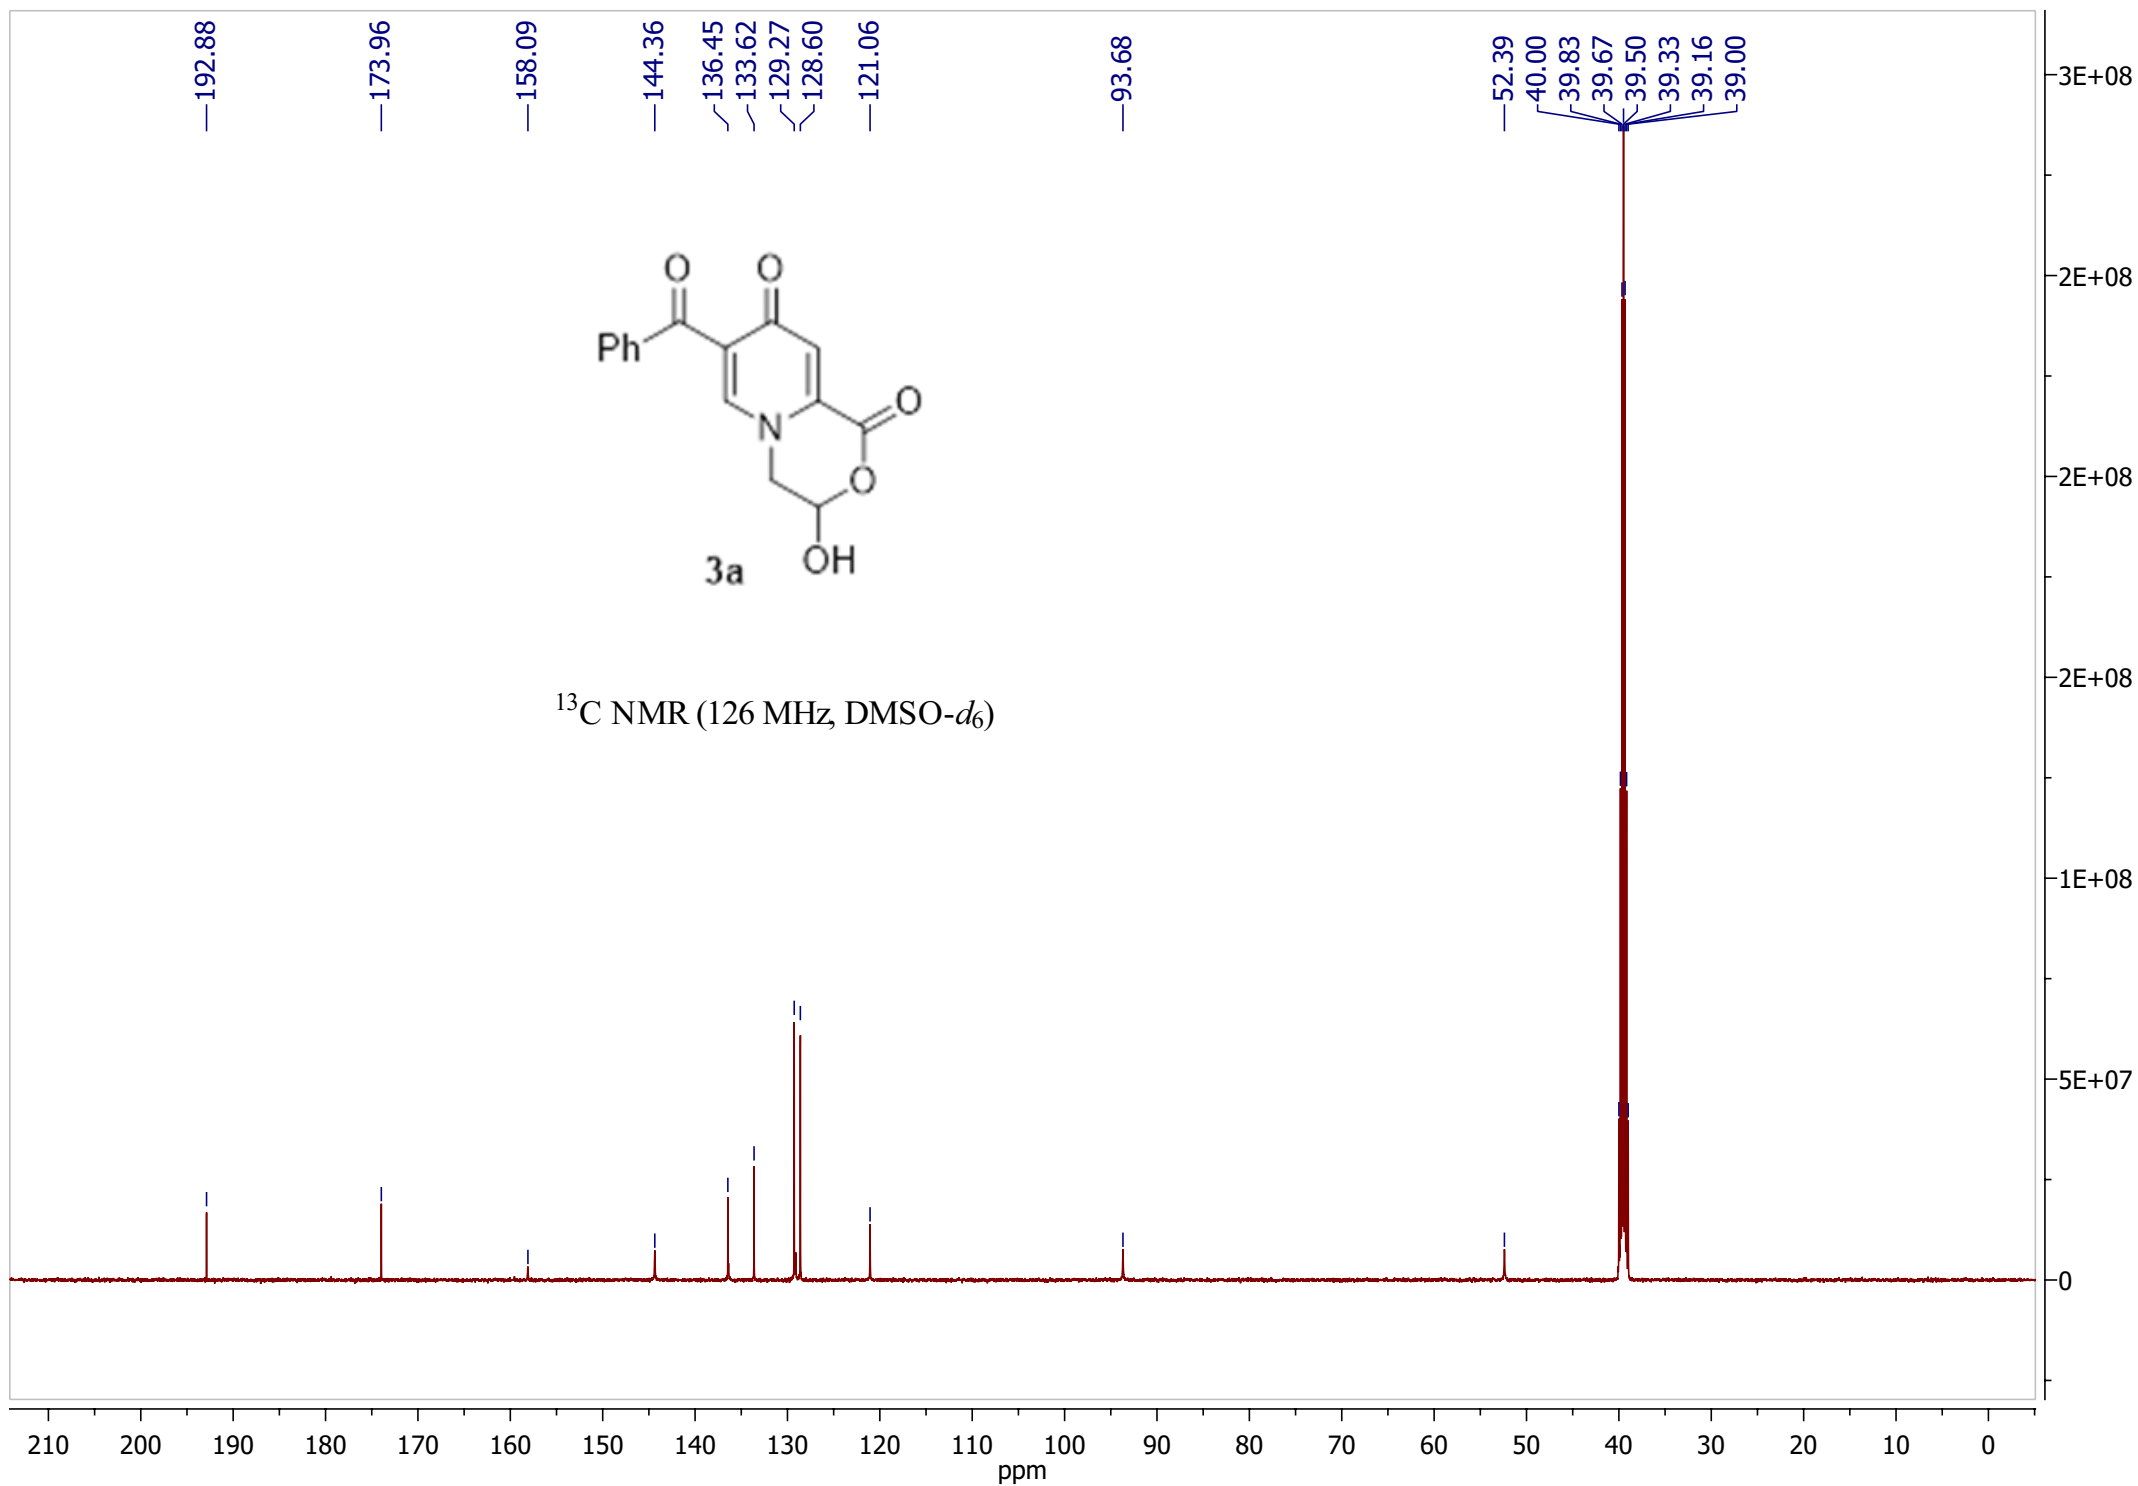

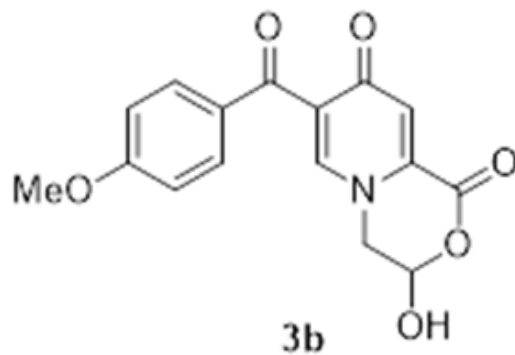

$^1\text{H}$  NMR (500 MHz,  $\text{DMSO}-d_6$ )

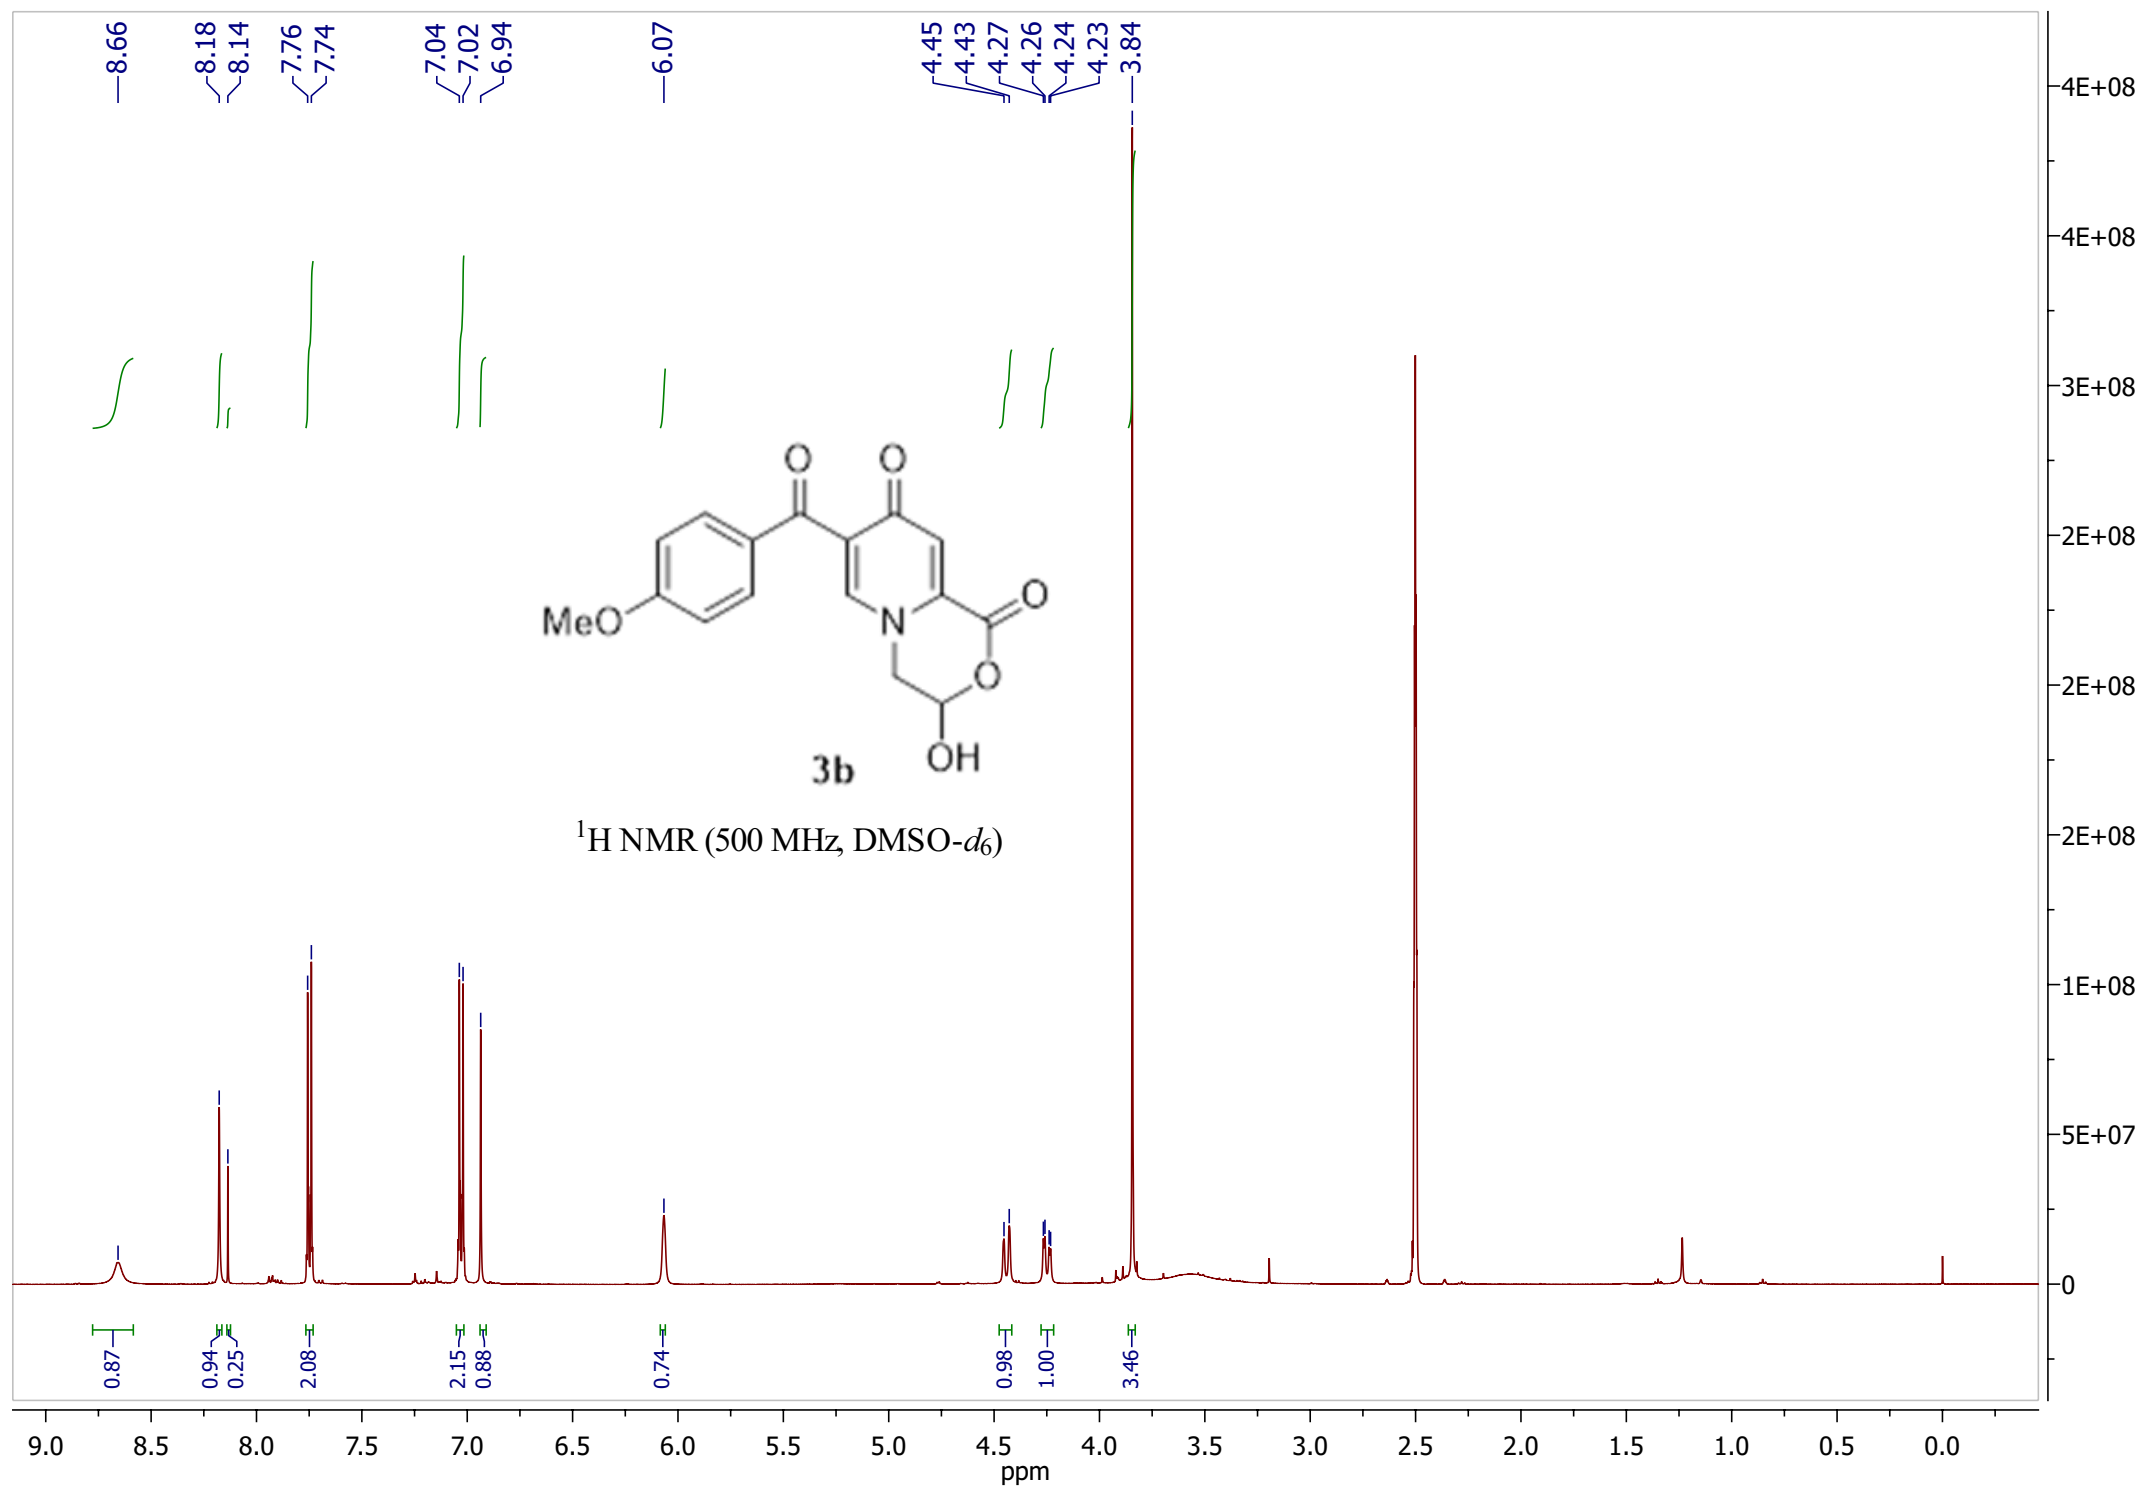

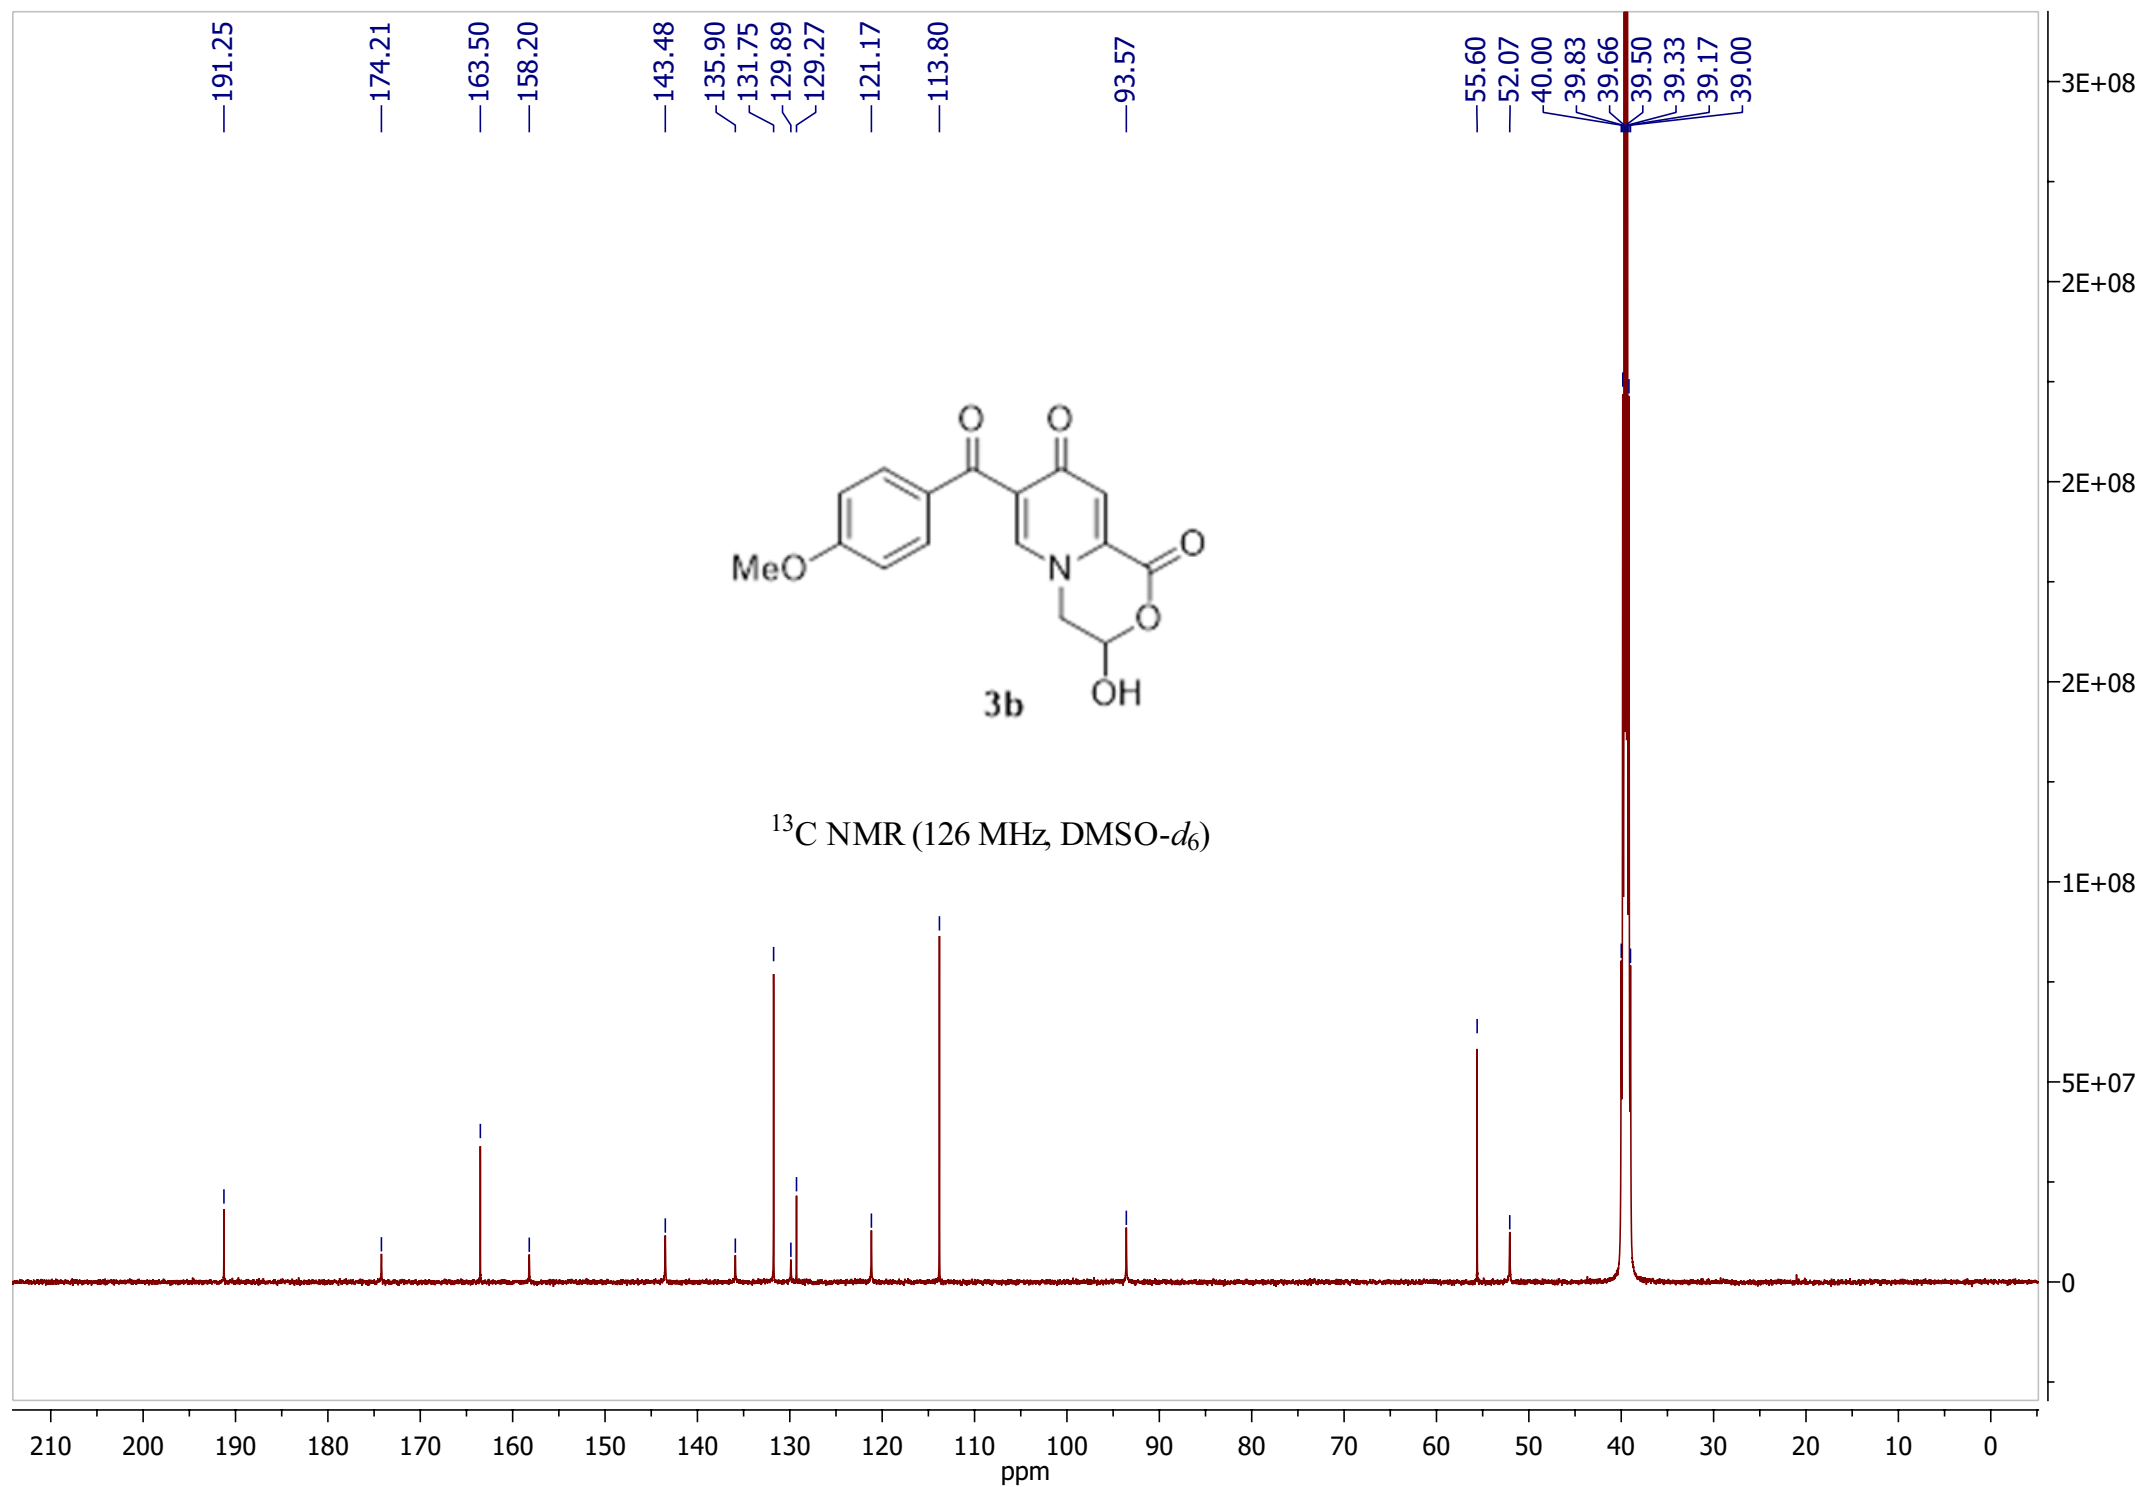

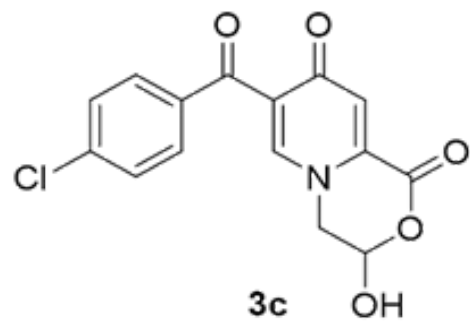

$^1\text{H}$  NMR (500 MHz,  $\text{DMSO}-d_6$ )

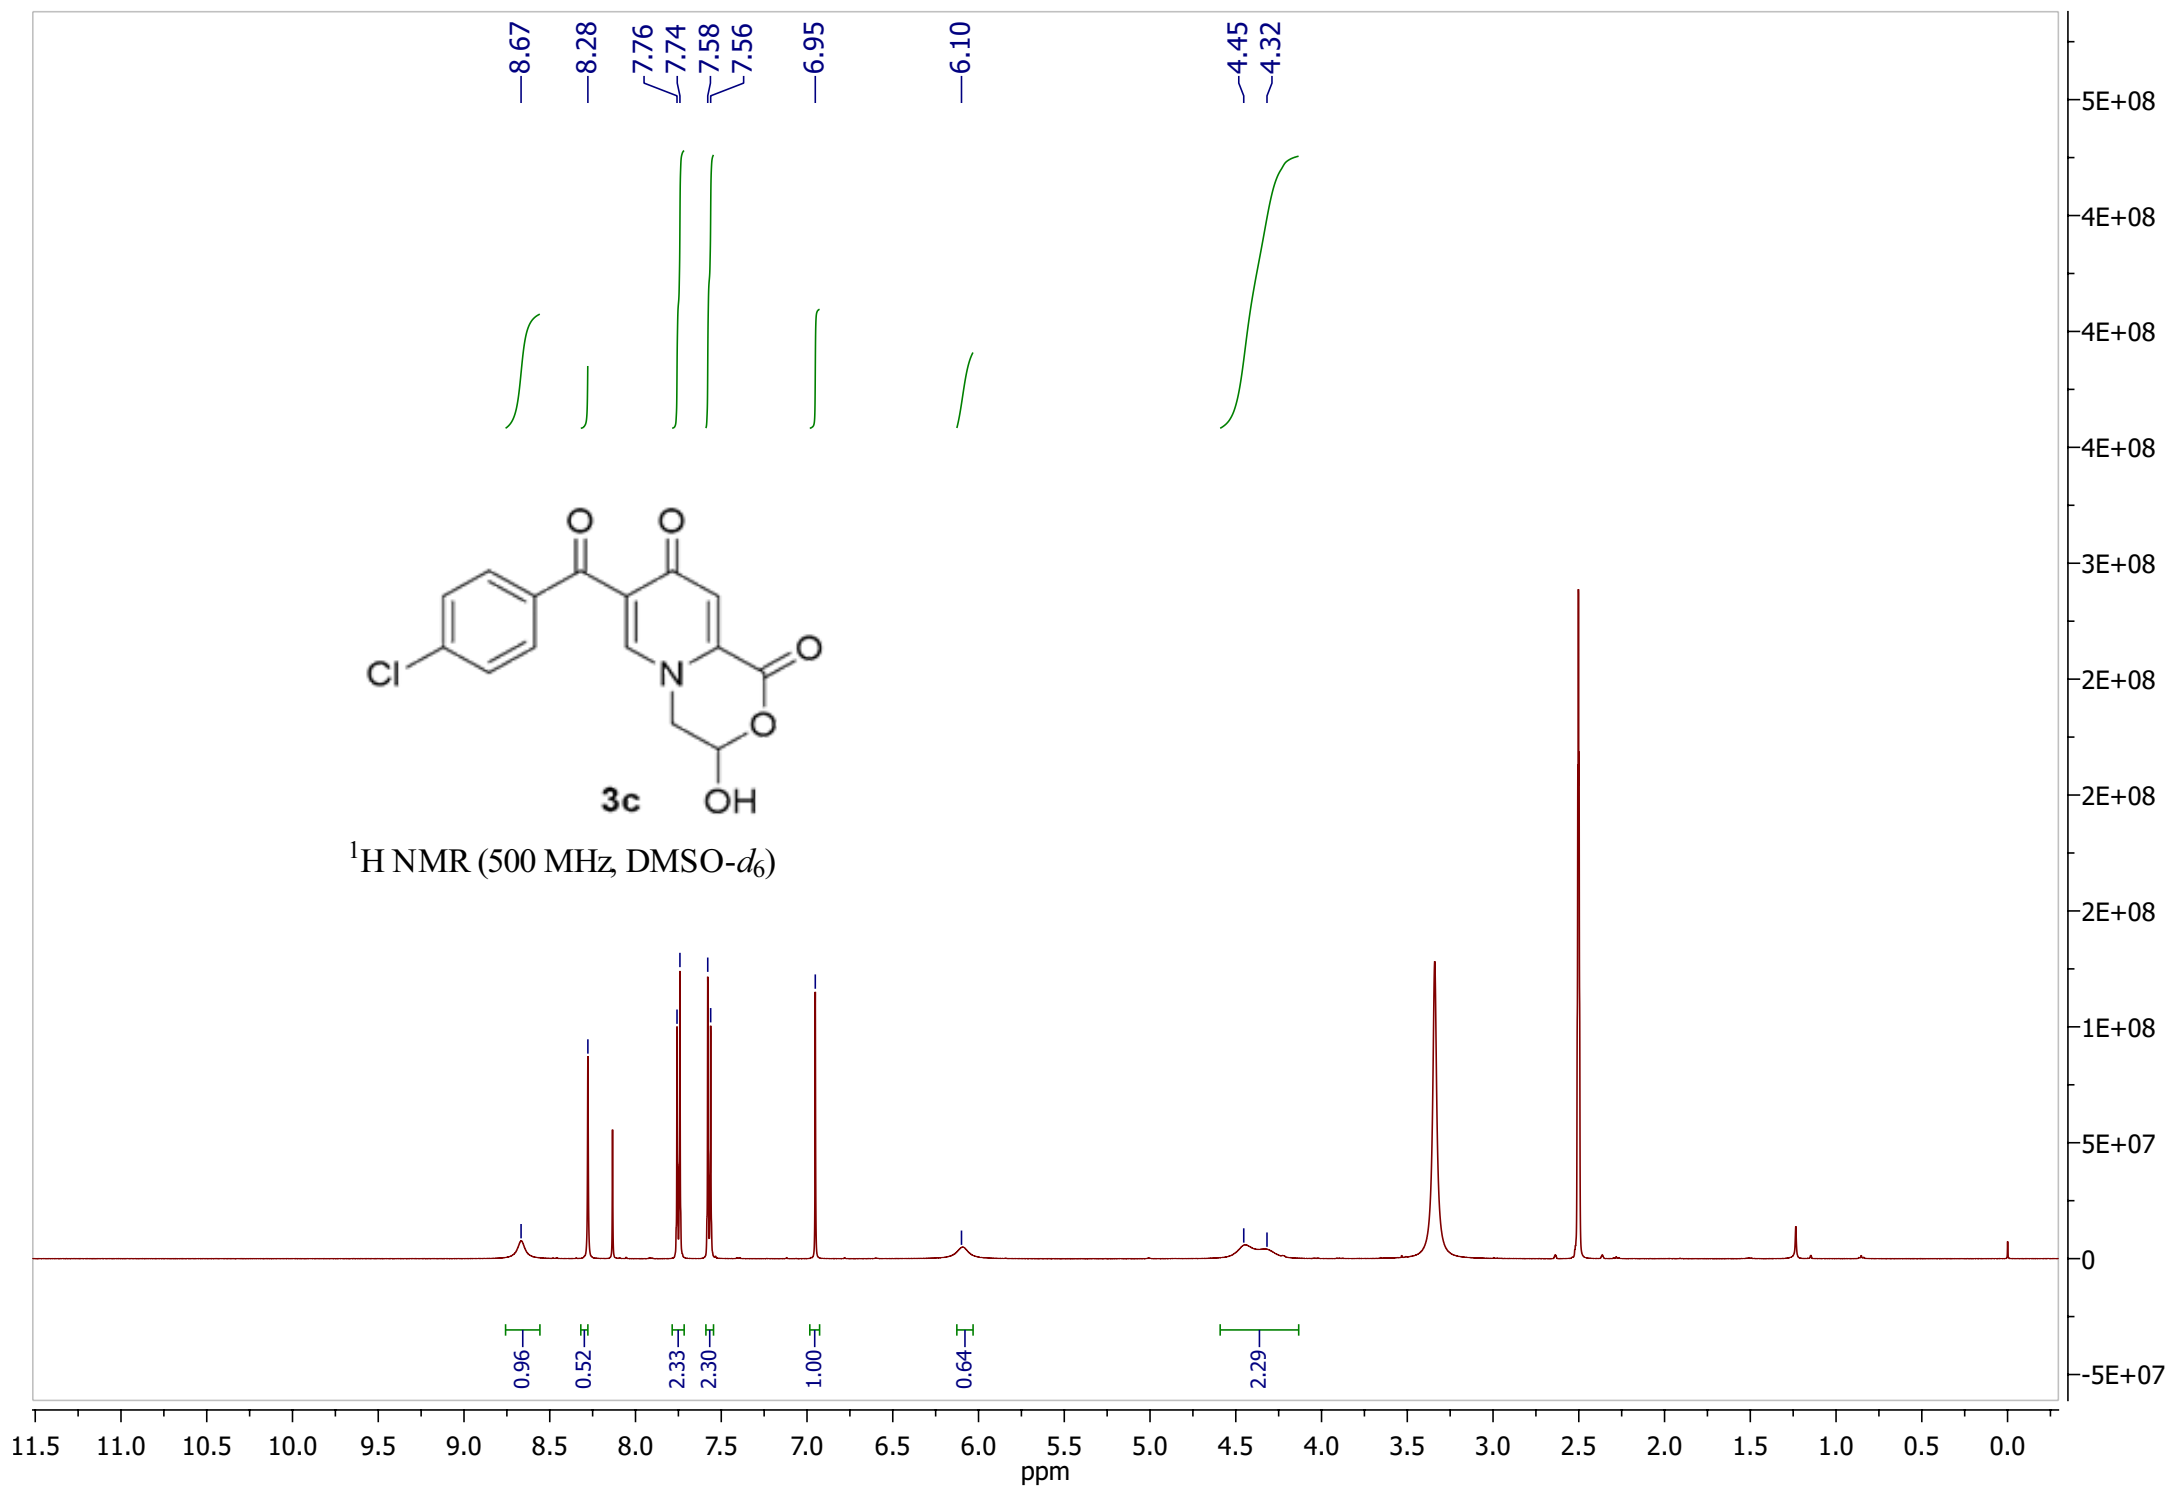

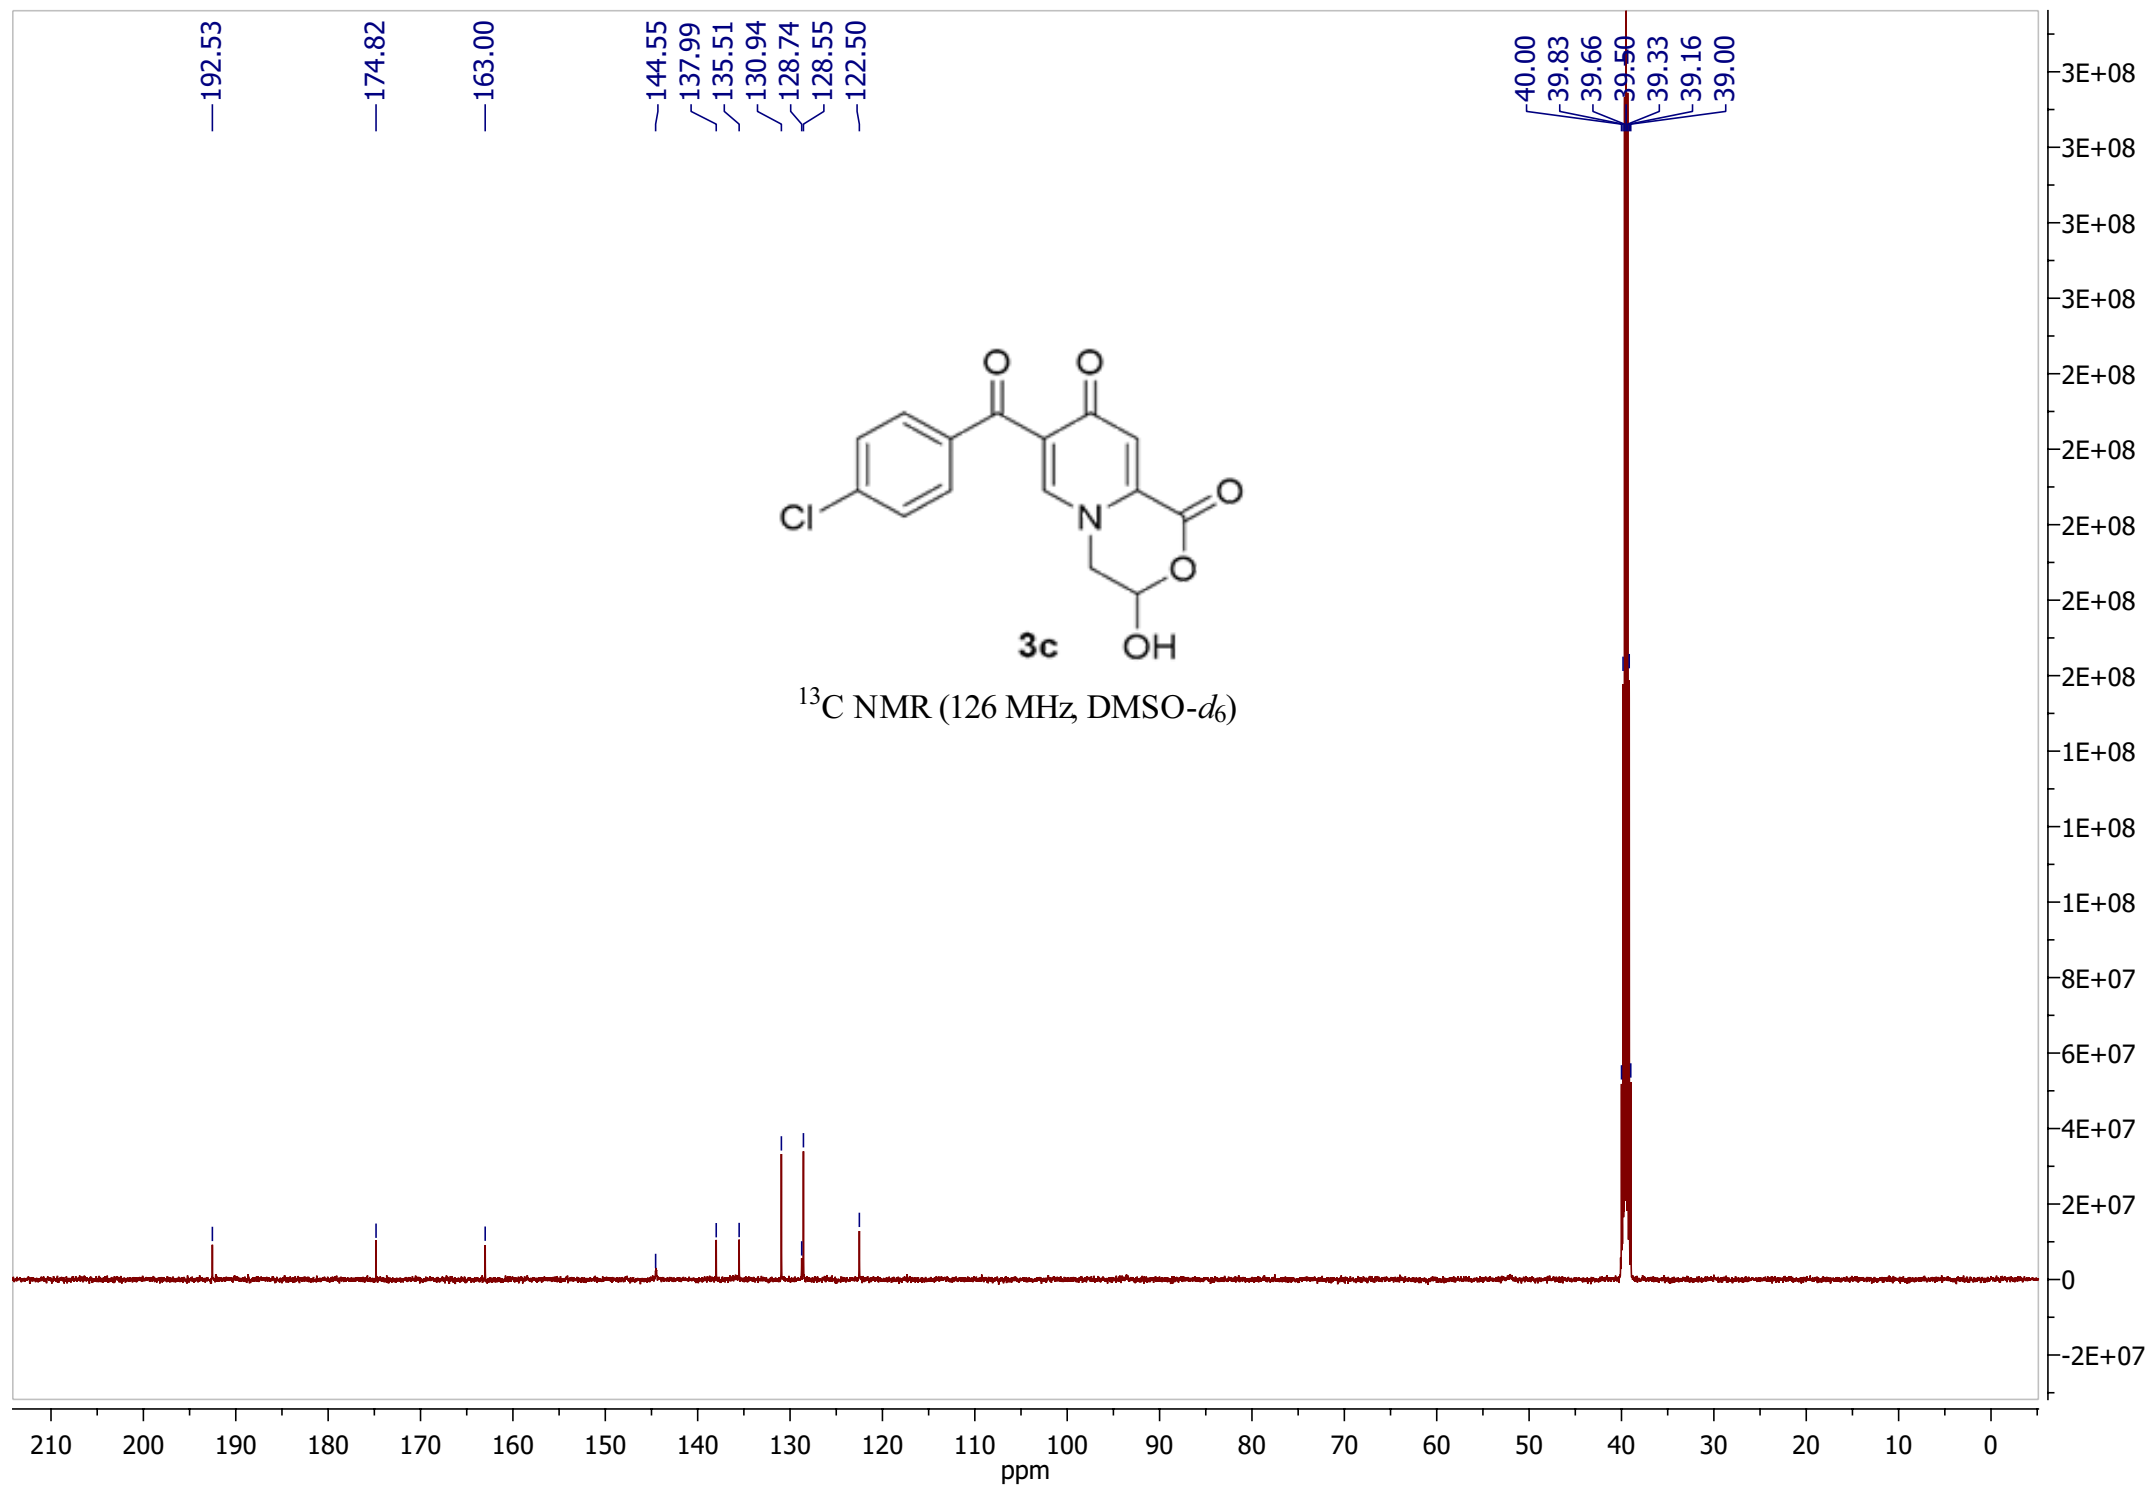

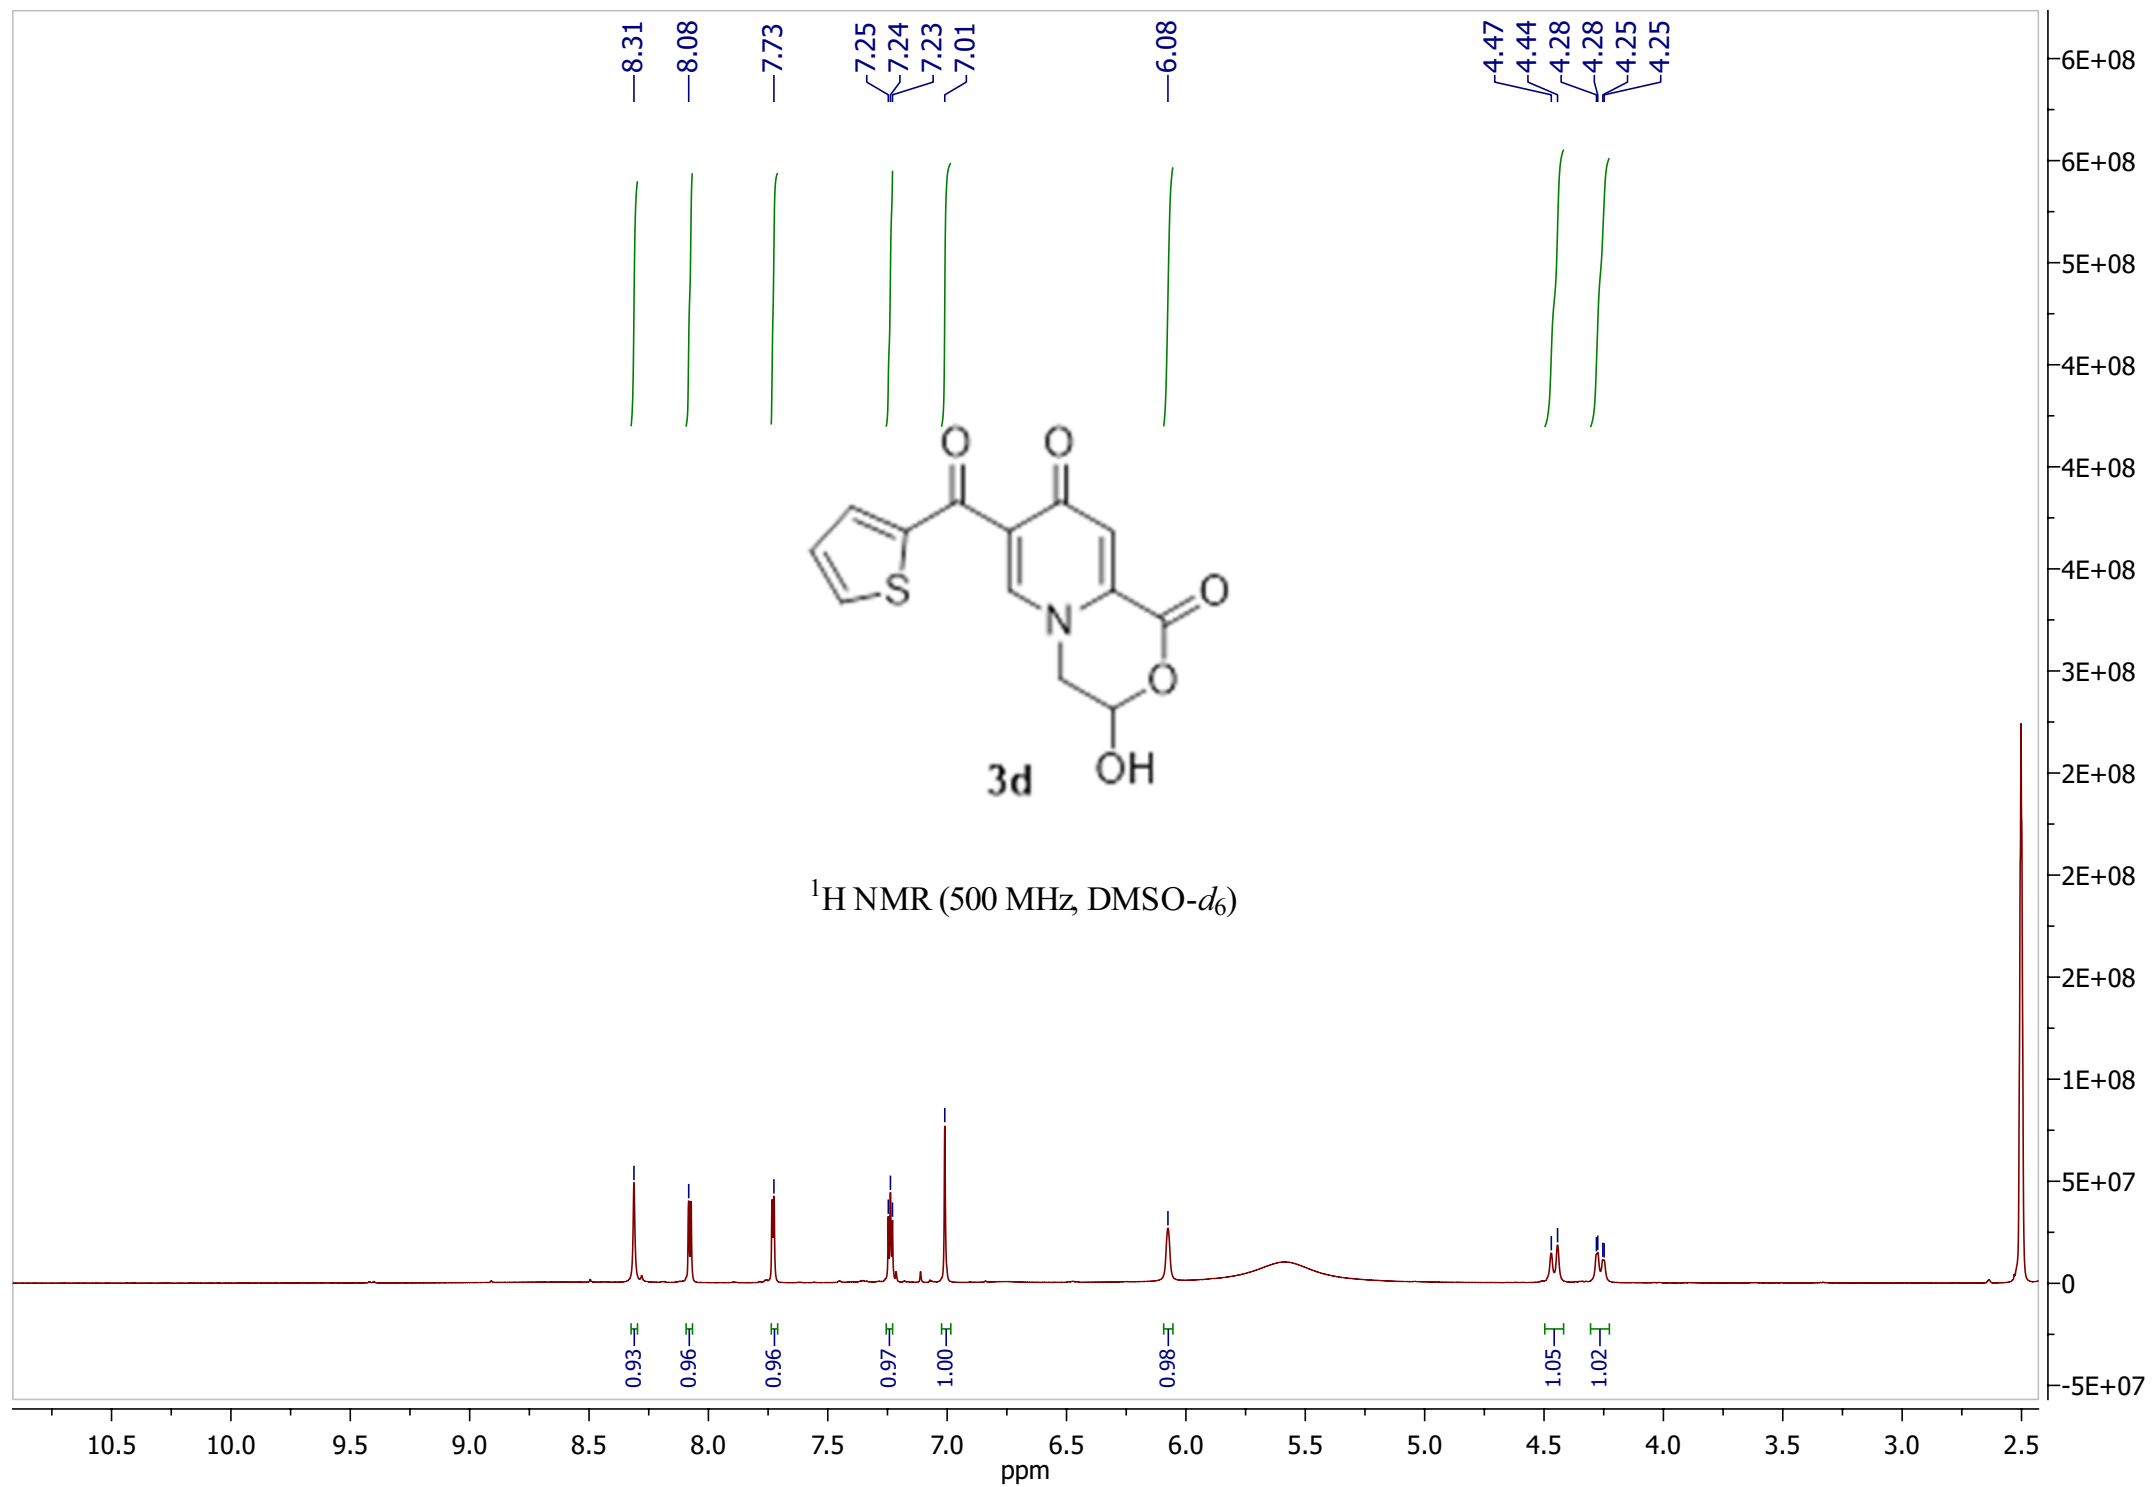

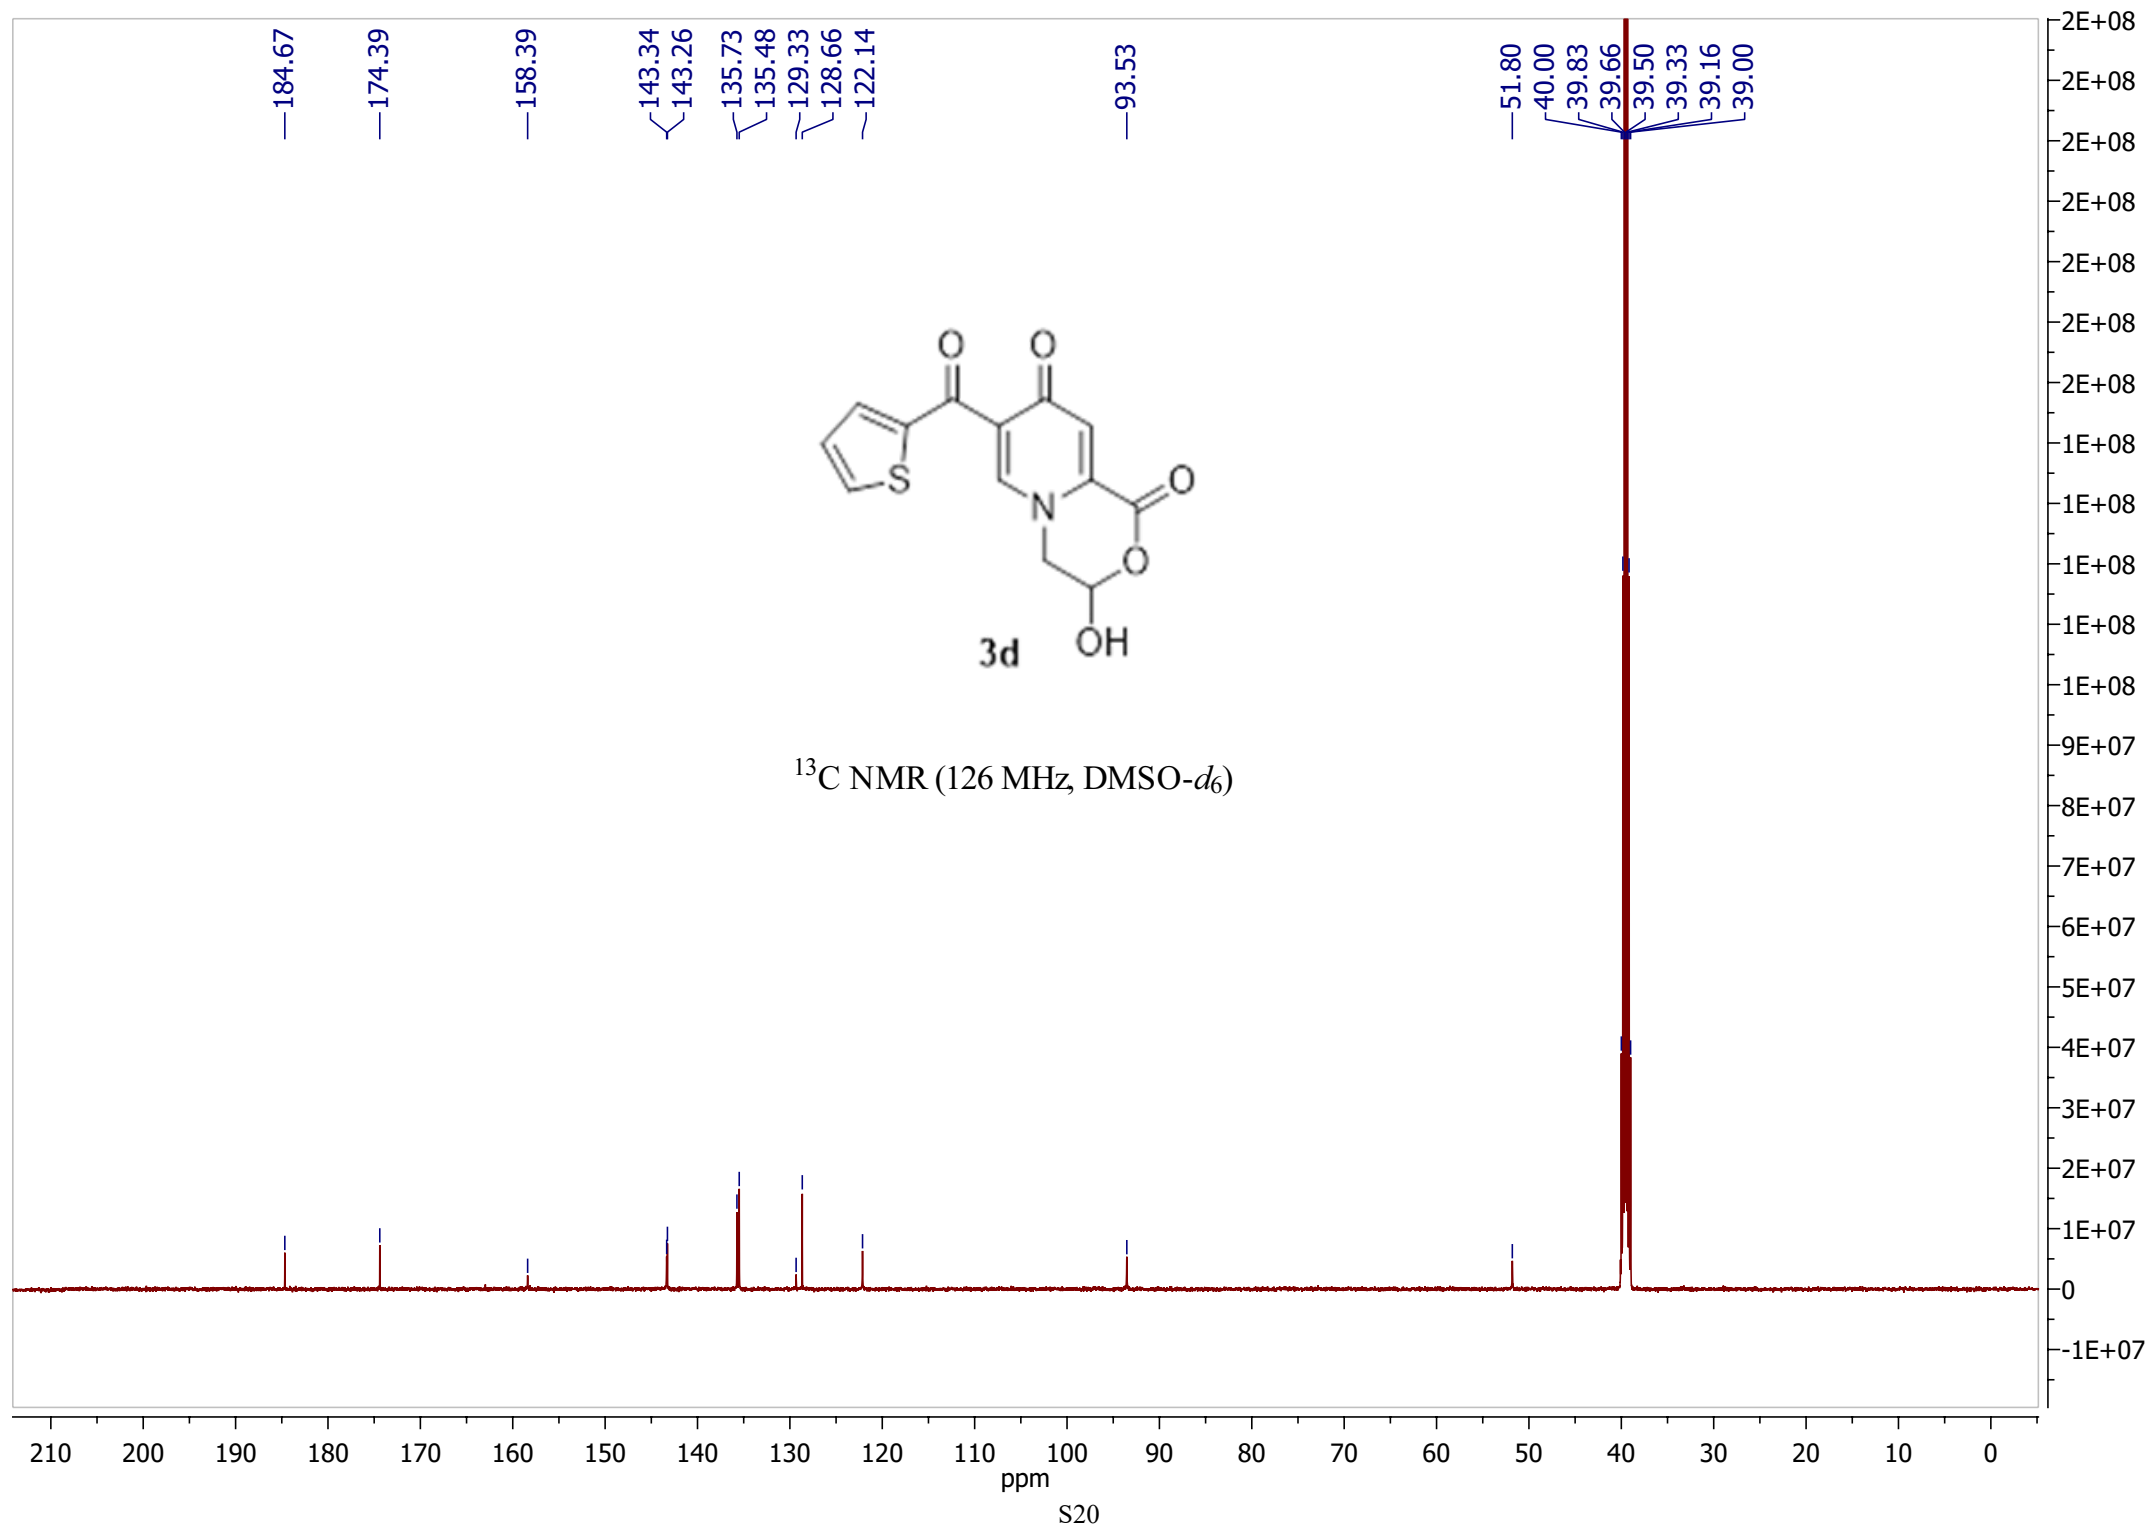



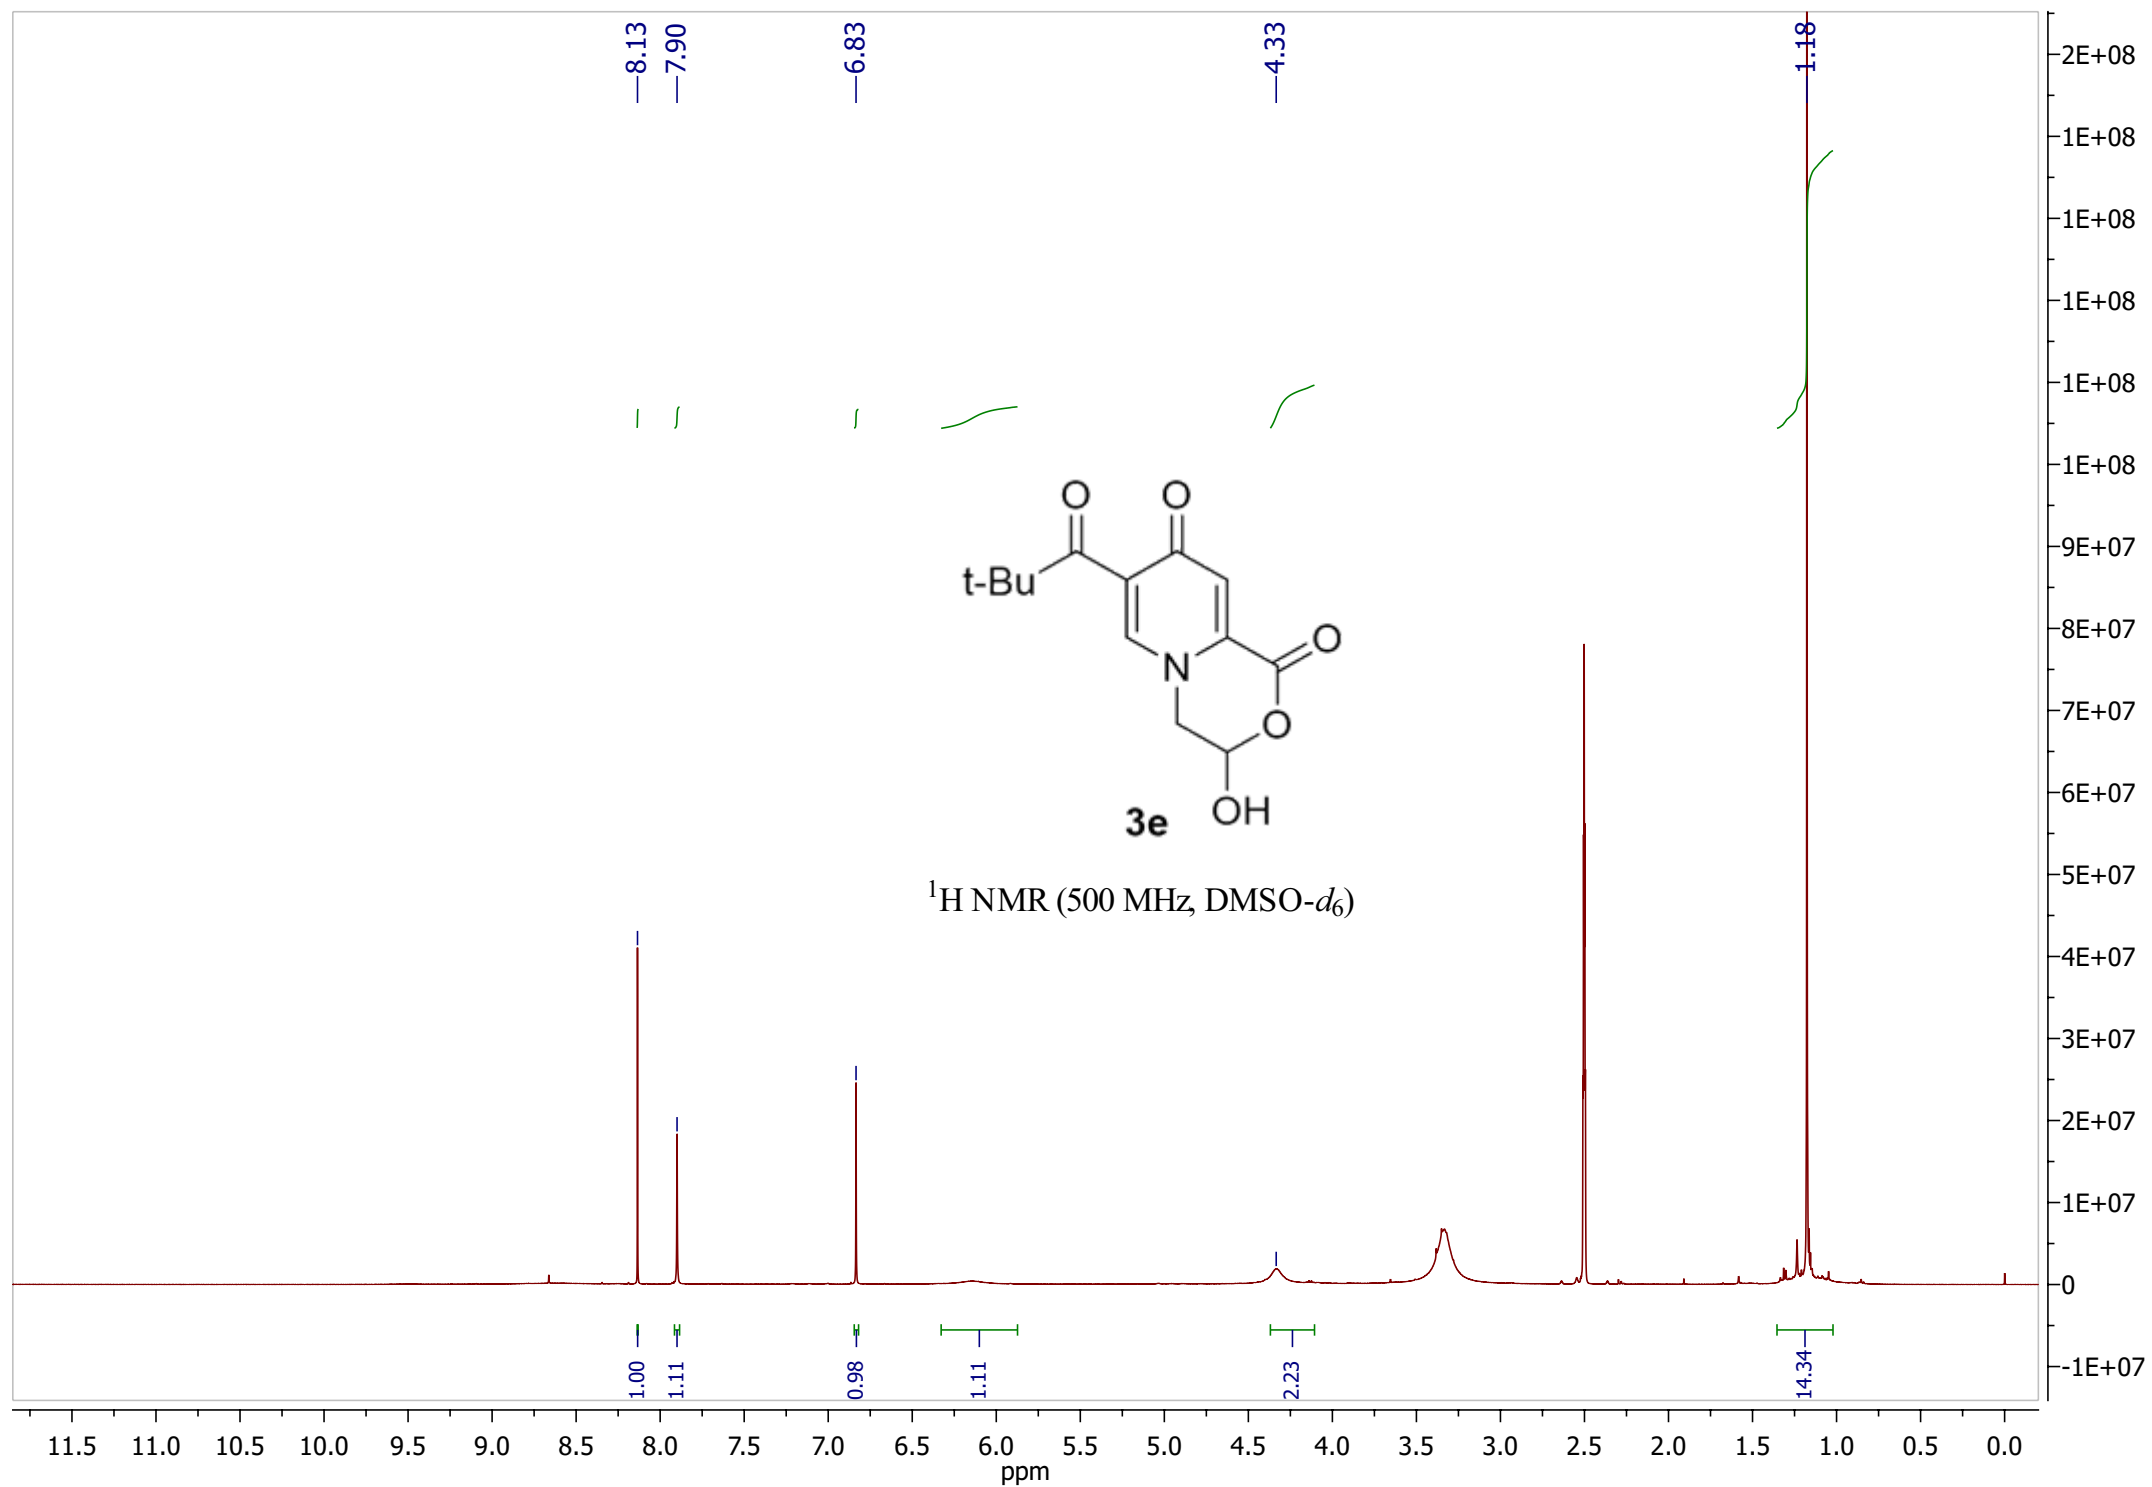

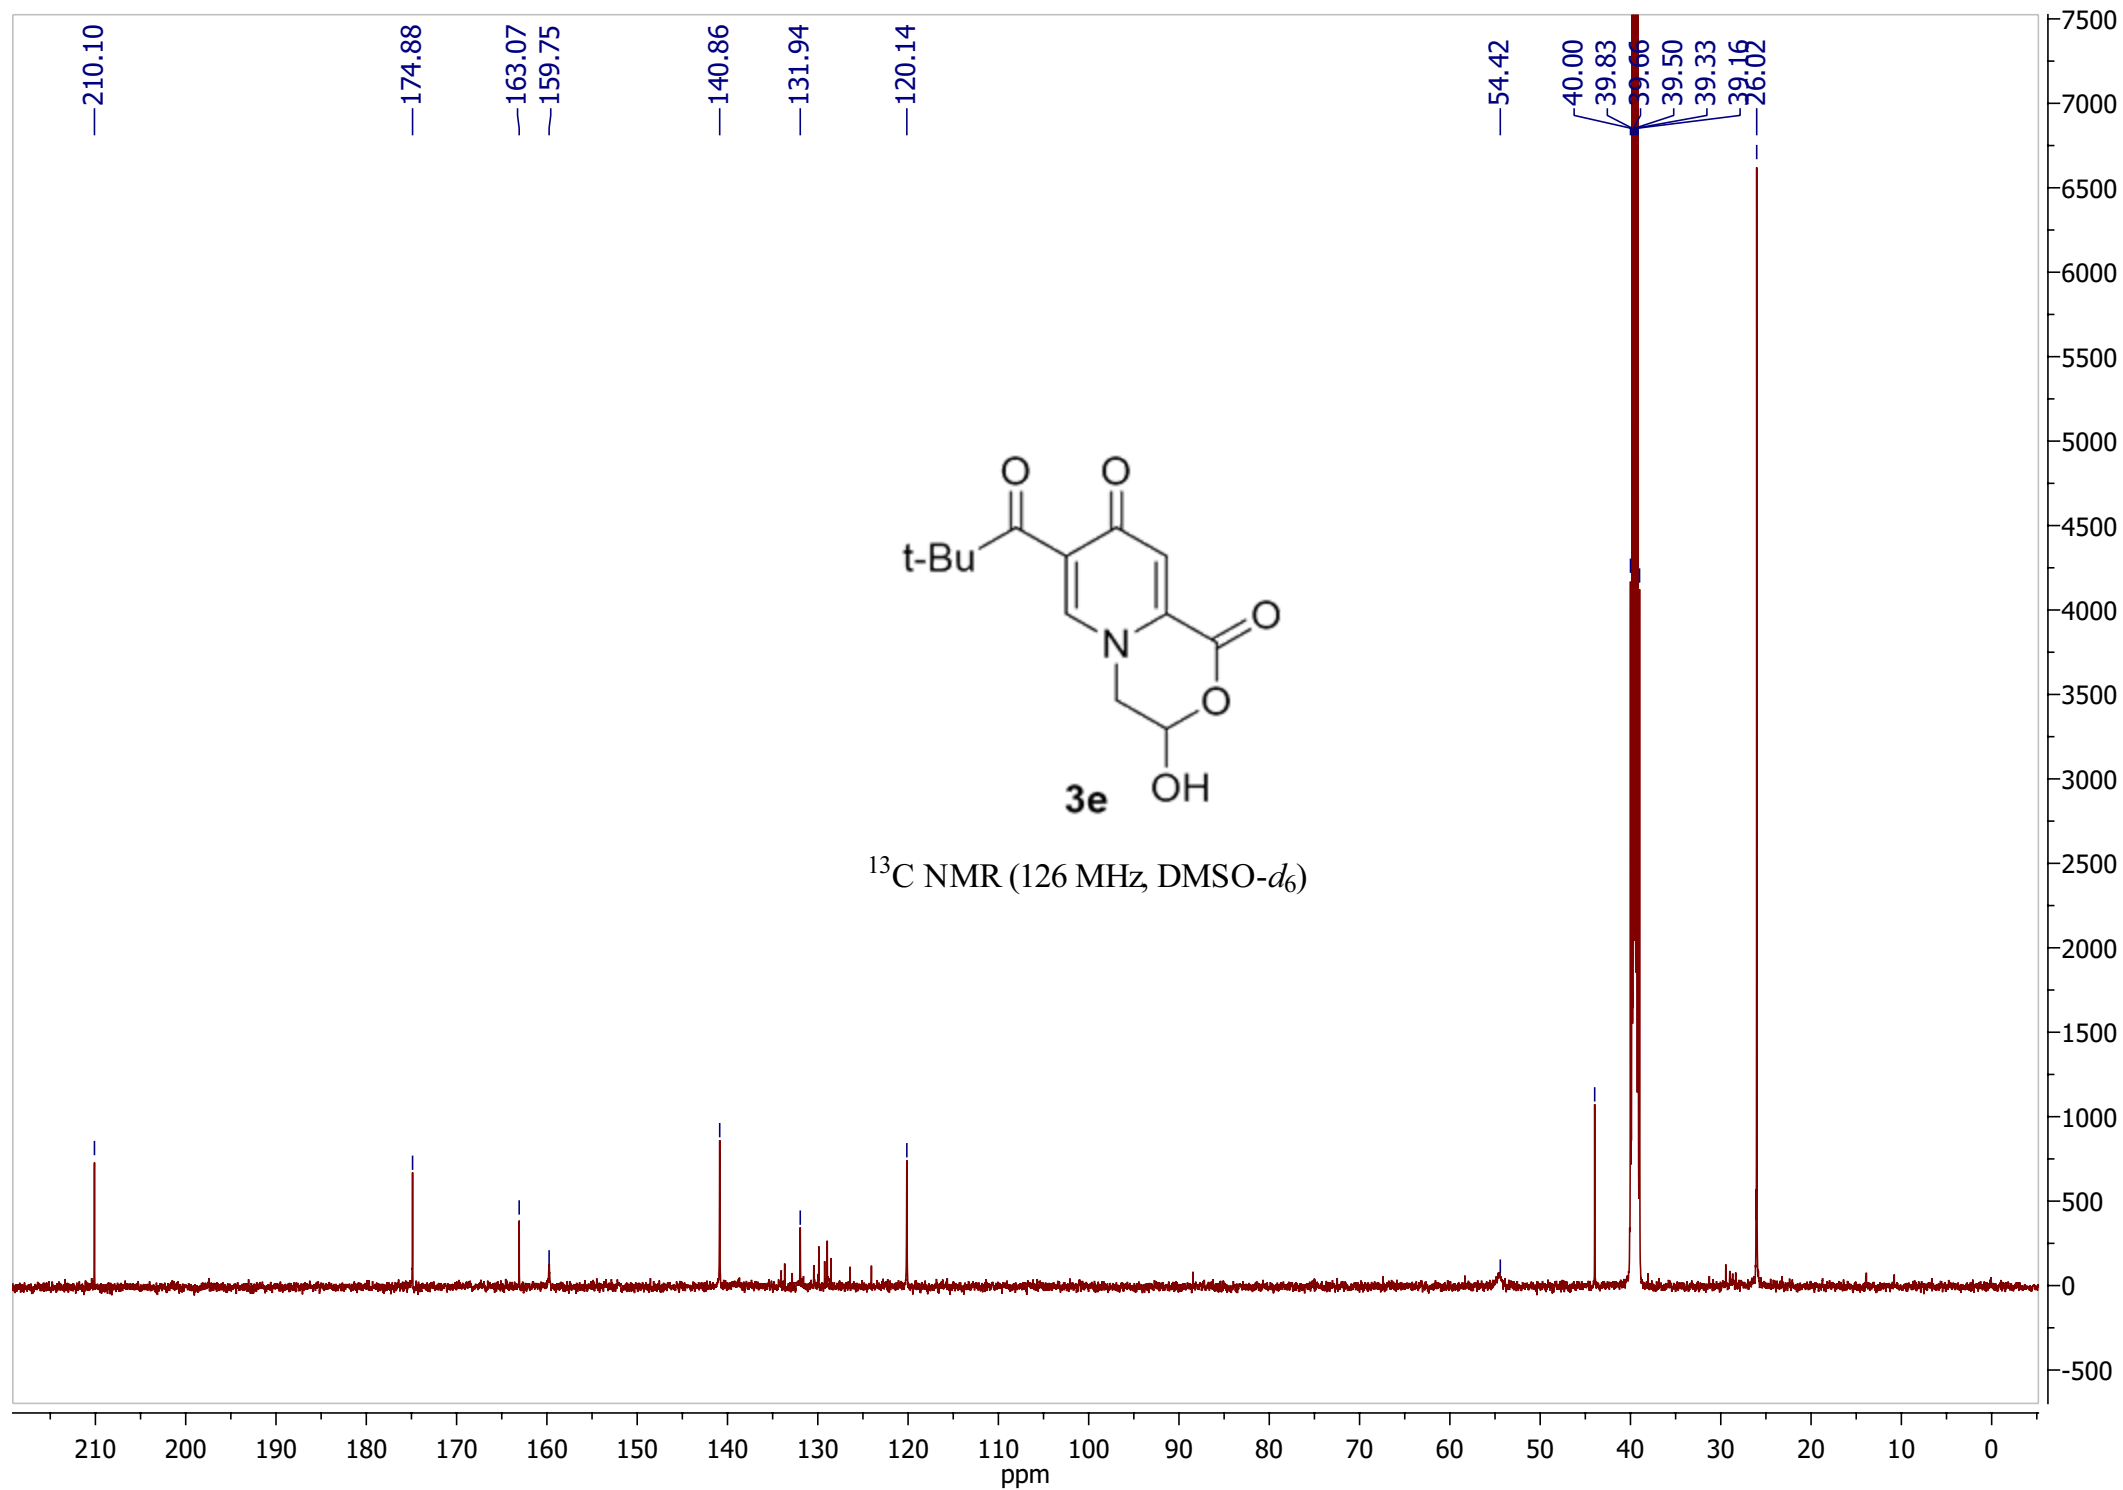

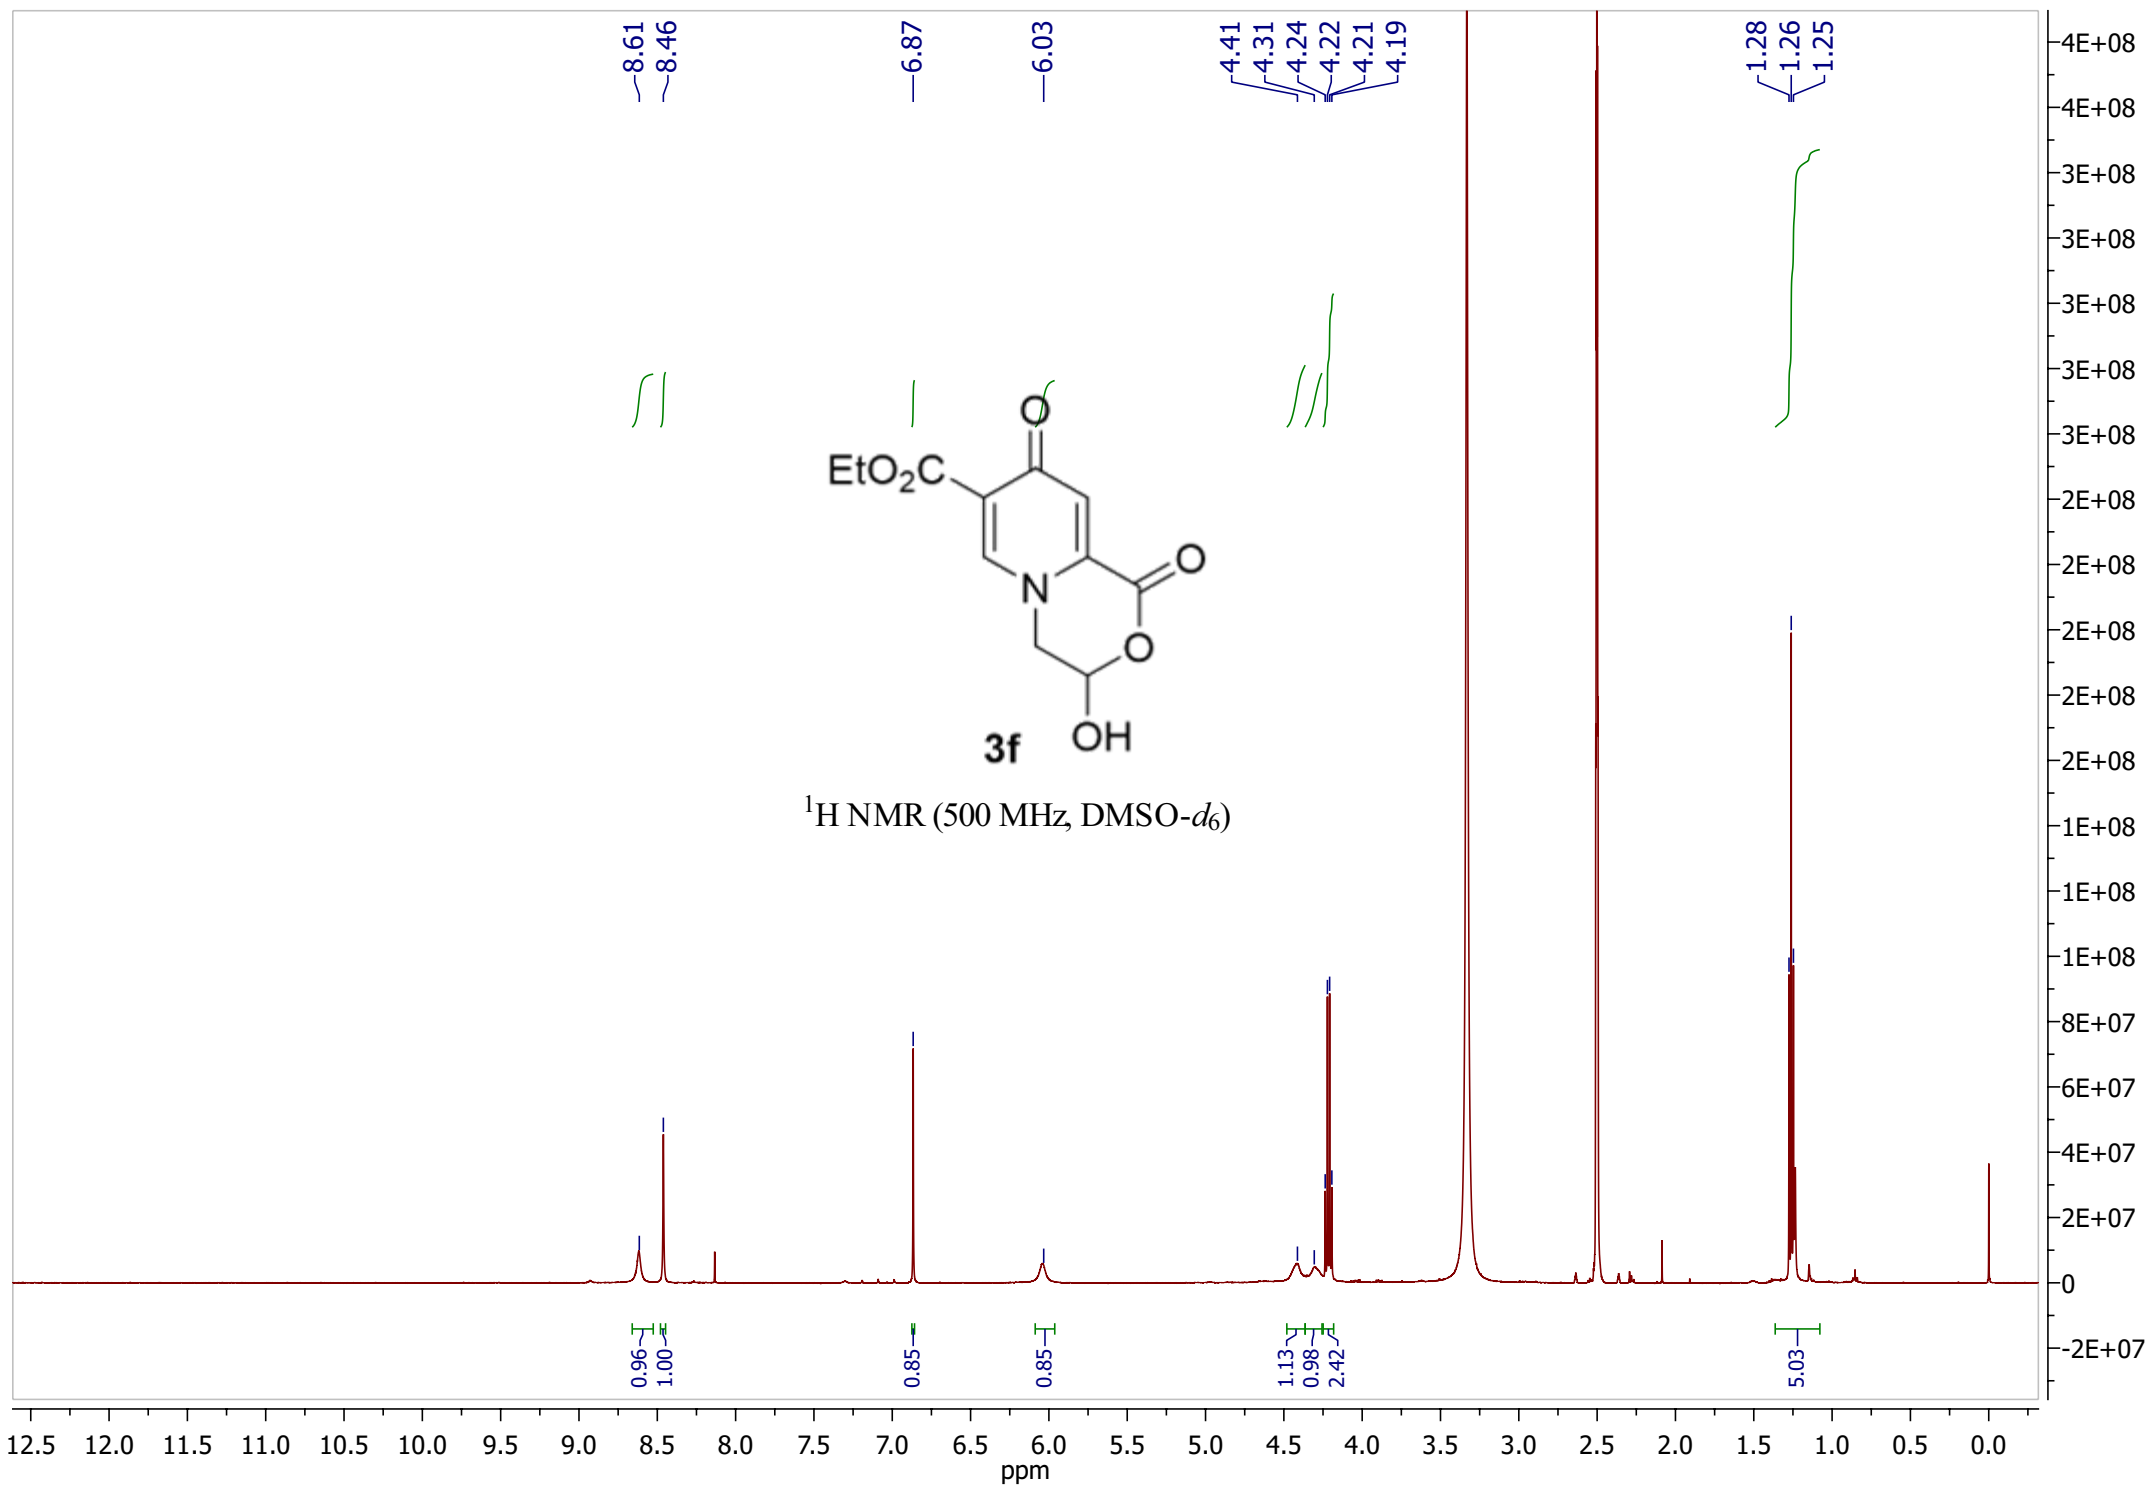

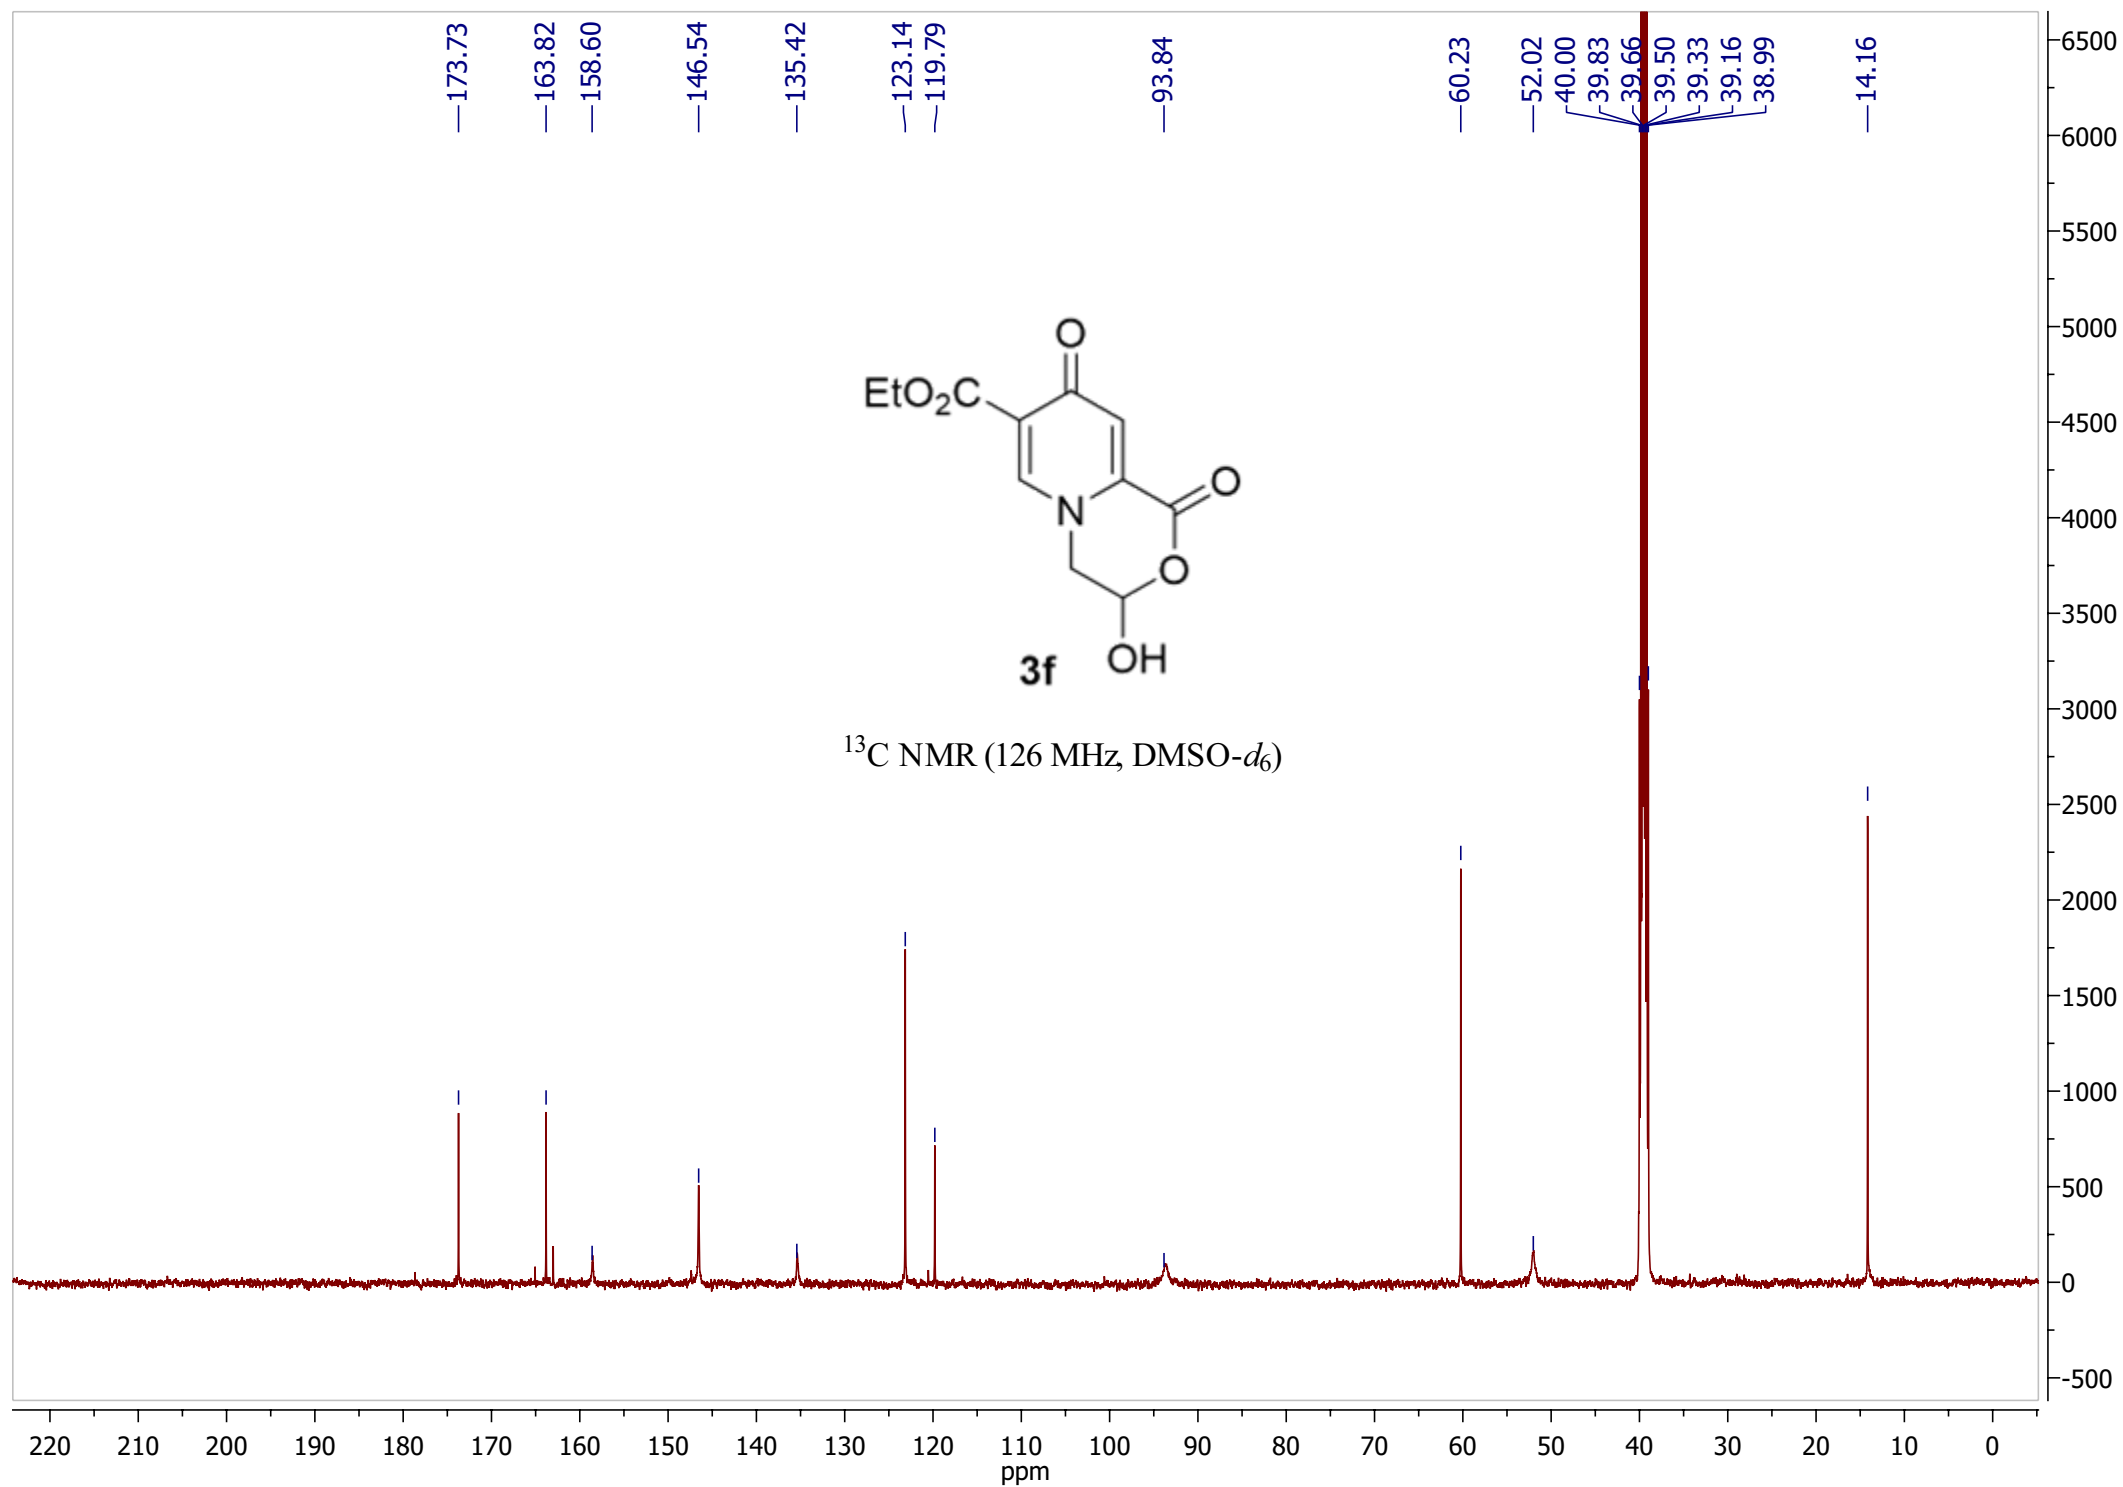

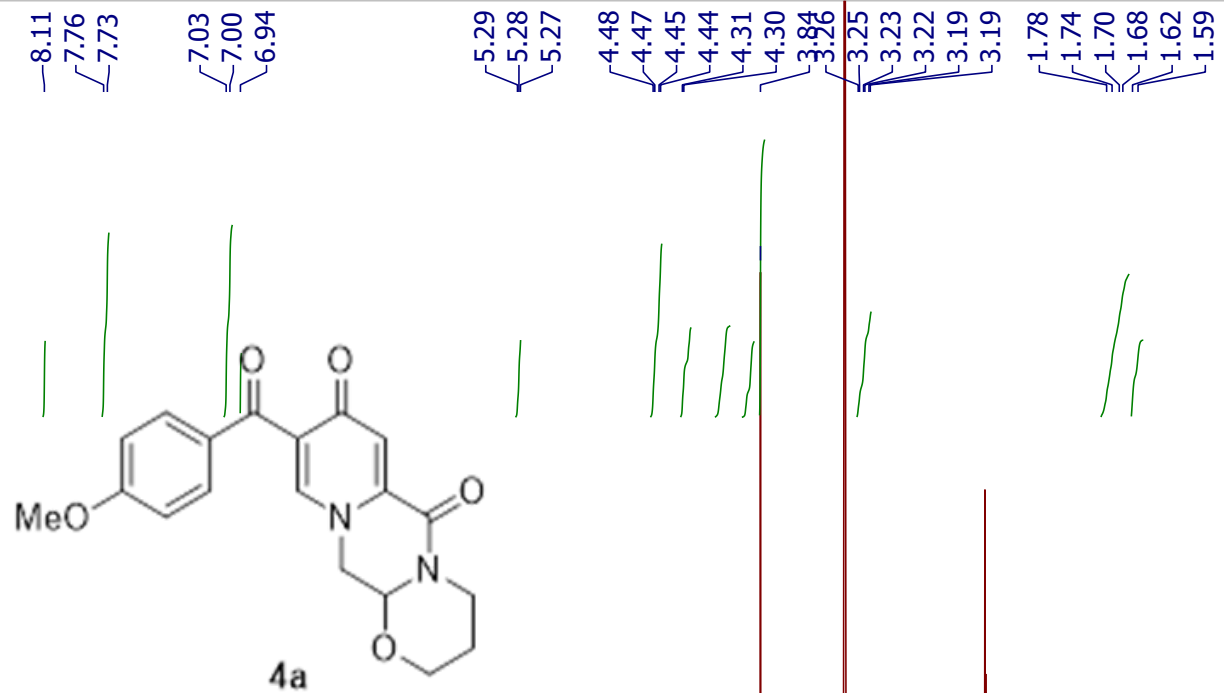

$^1\text{H}$  NMR (400 MHz, DMSO- $d_6$ )

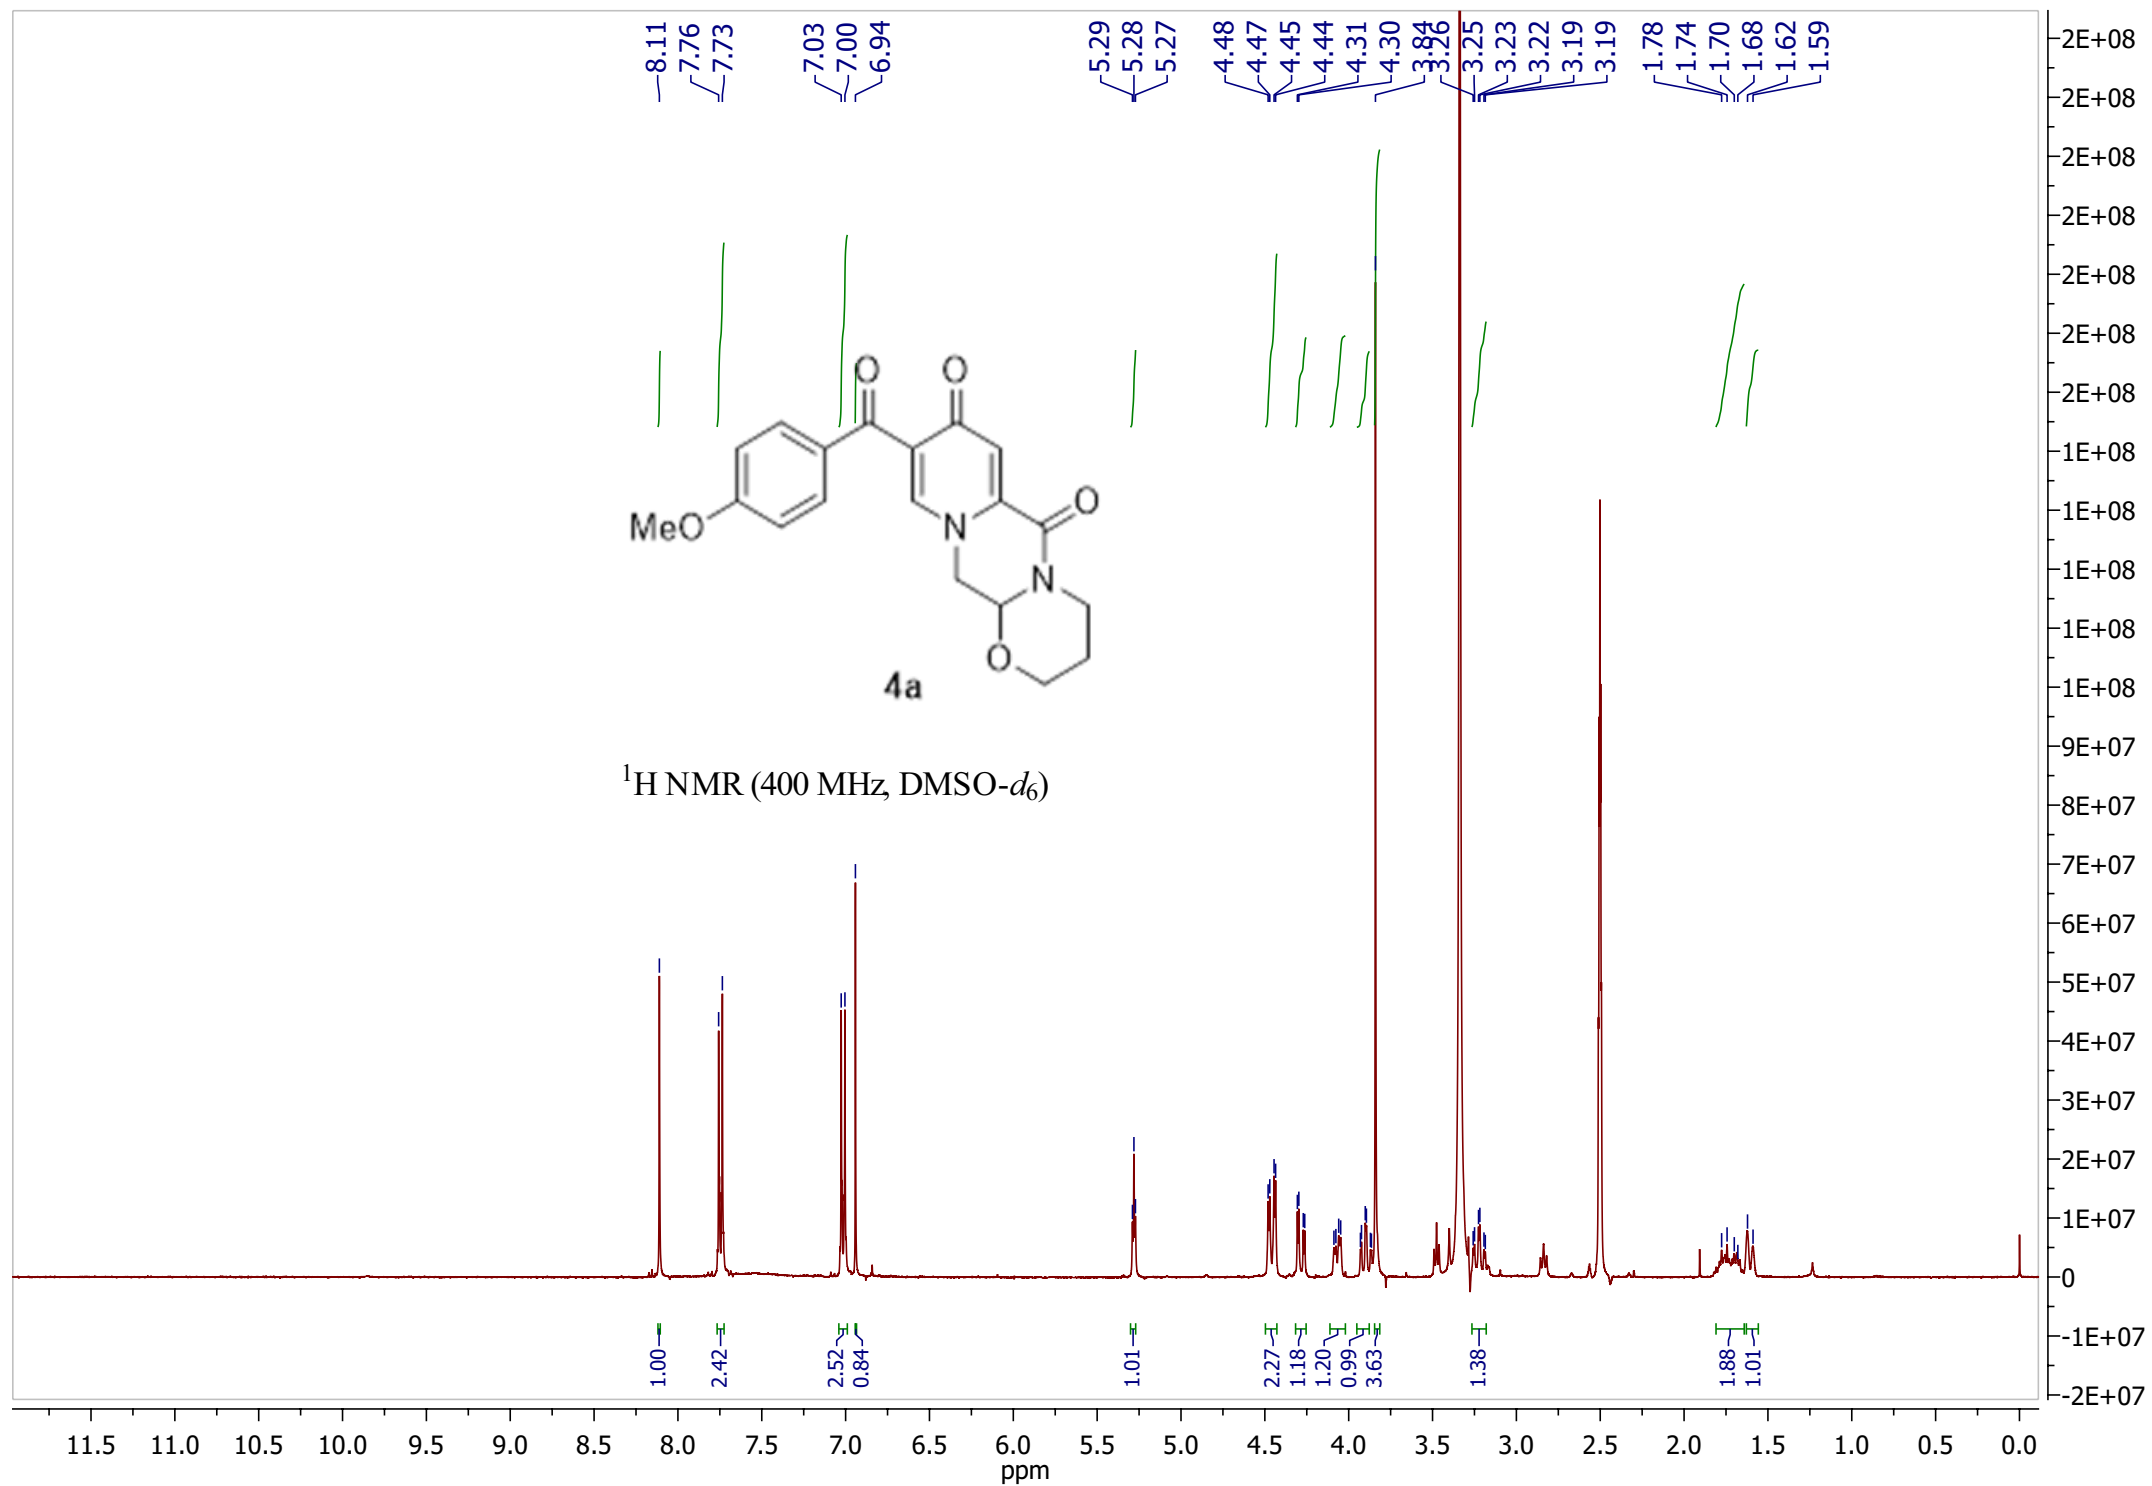

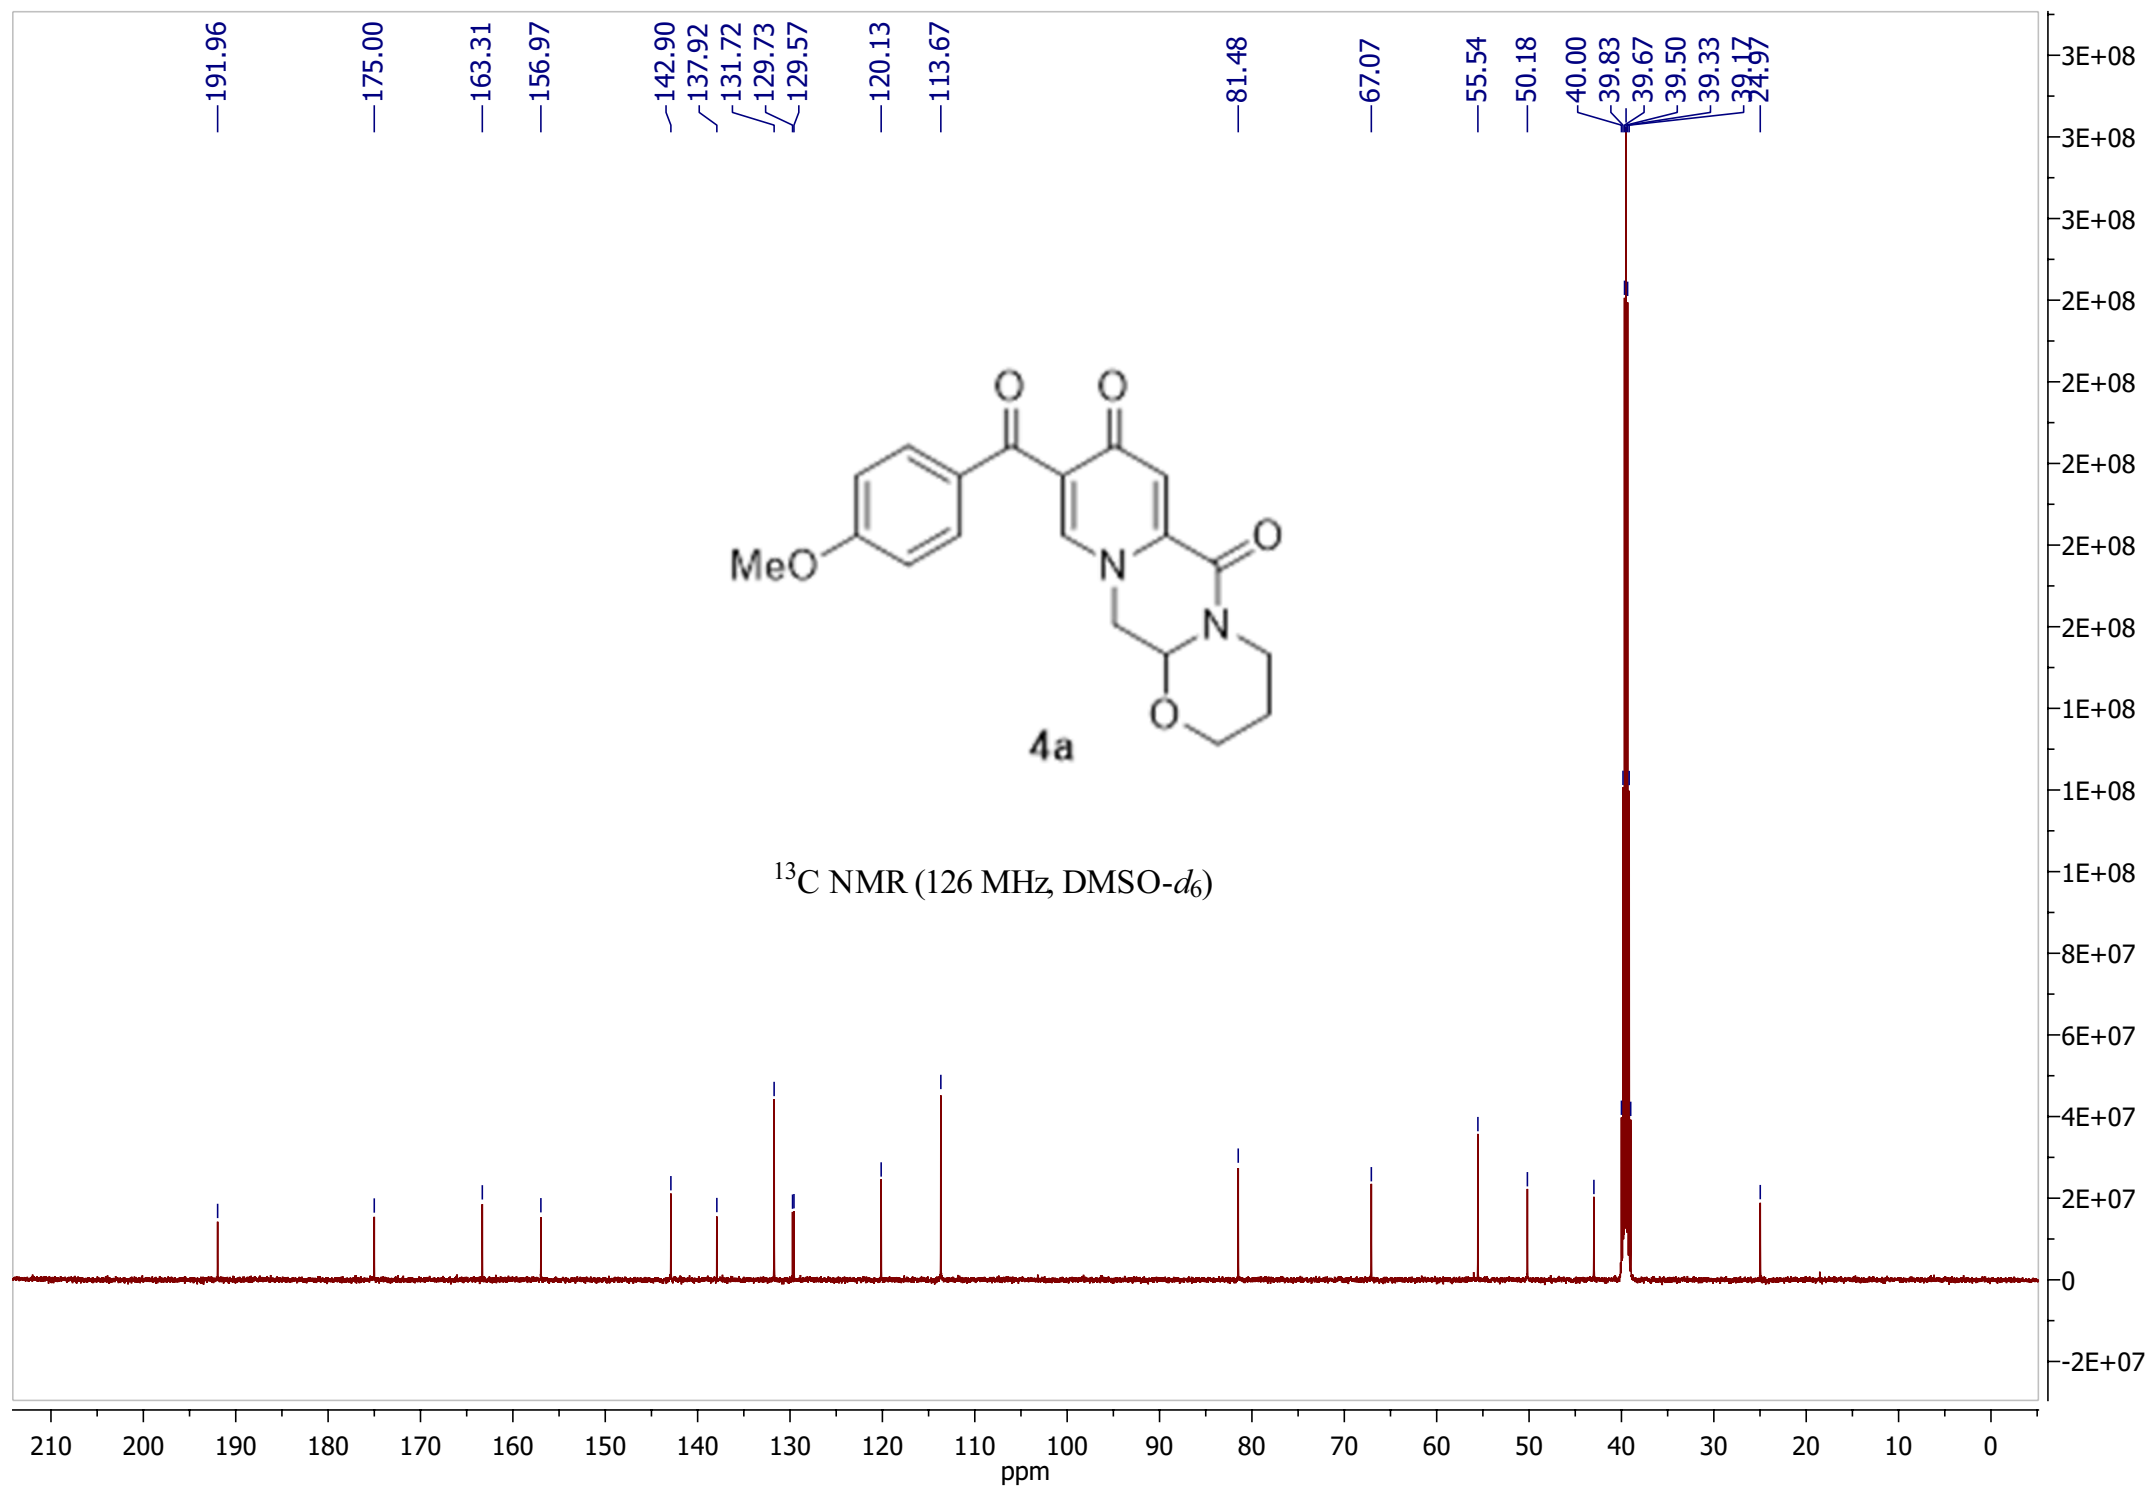



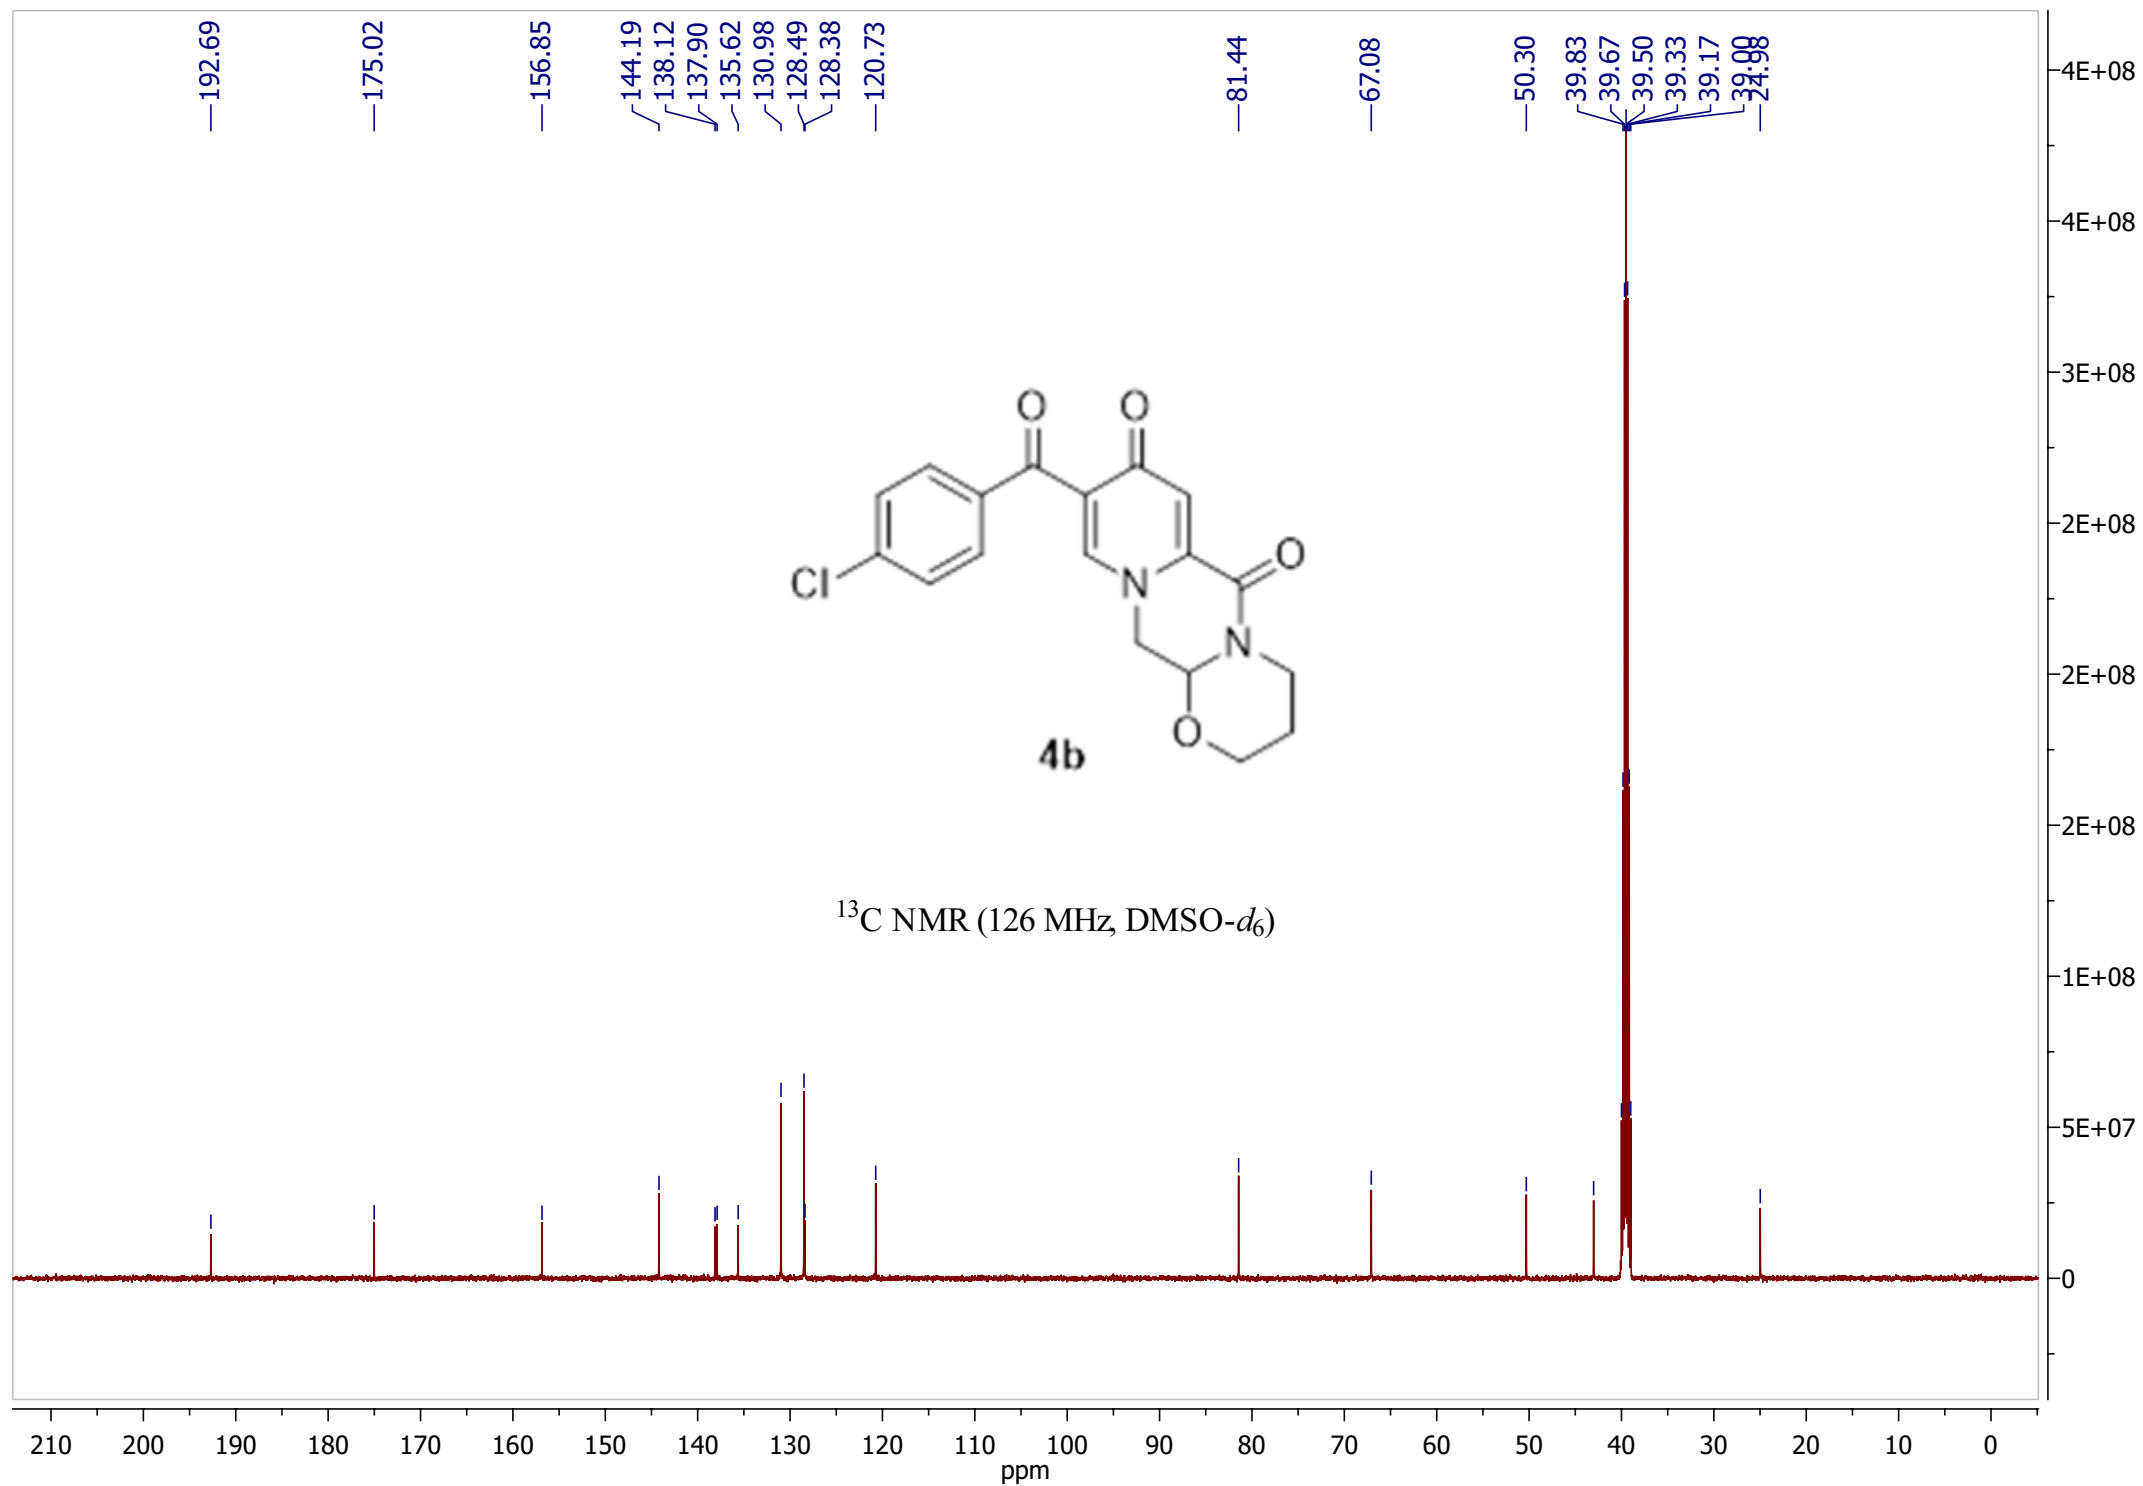



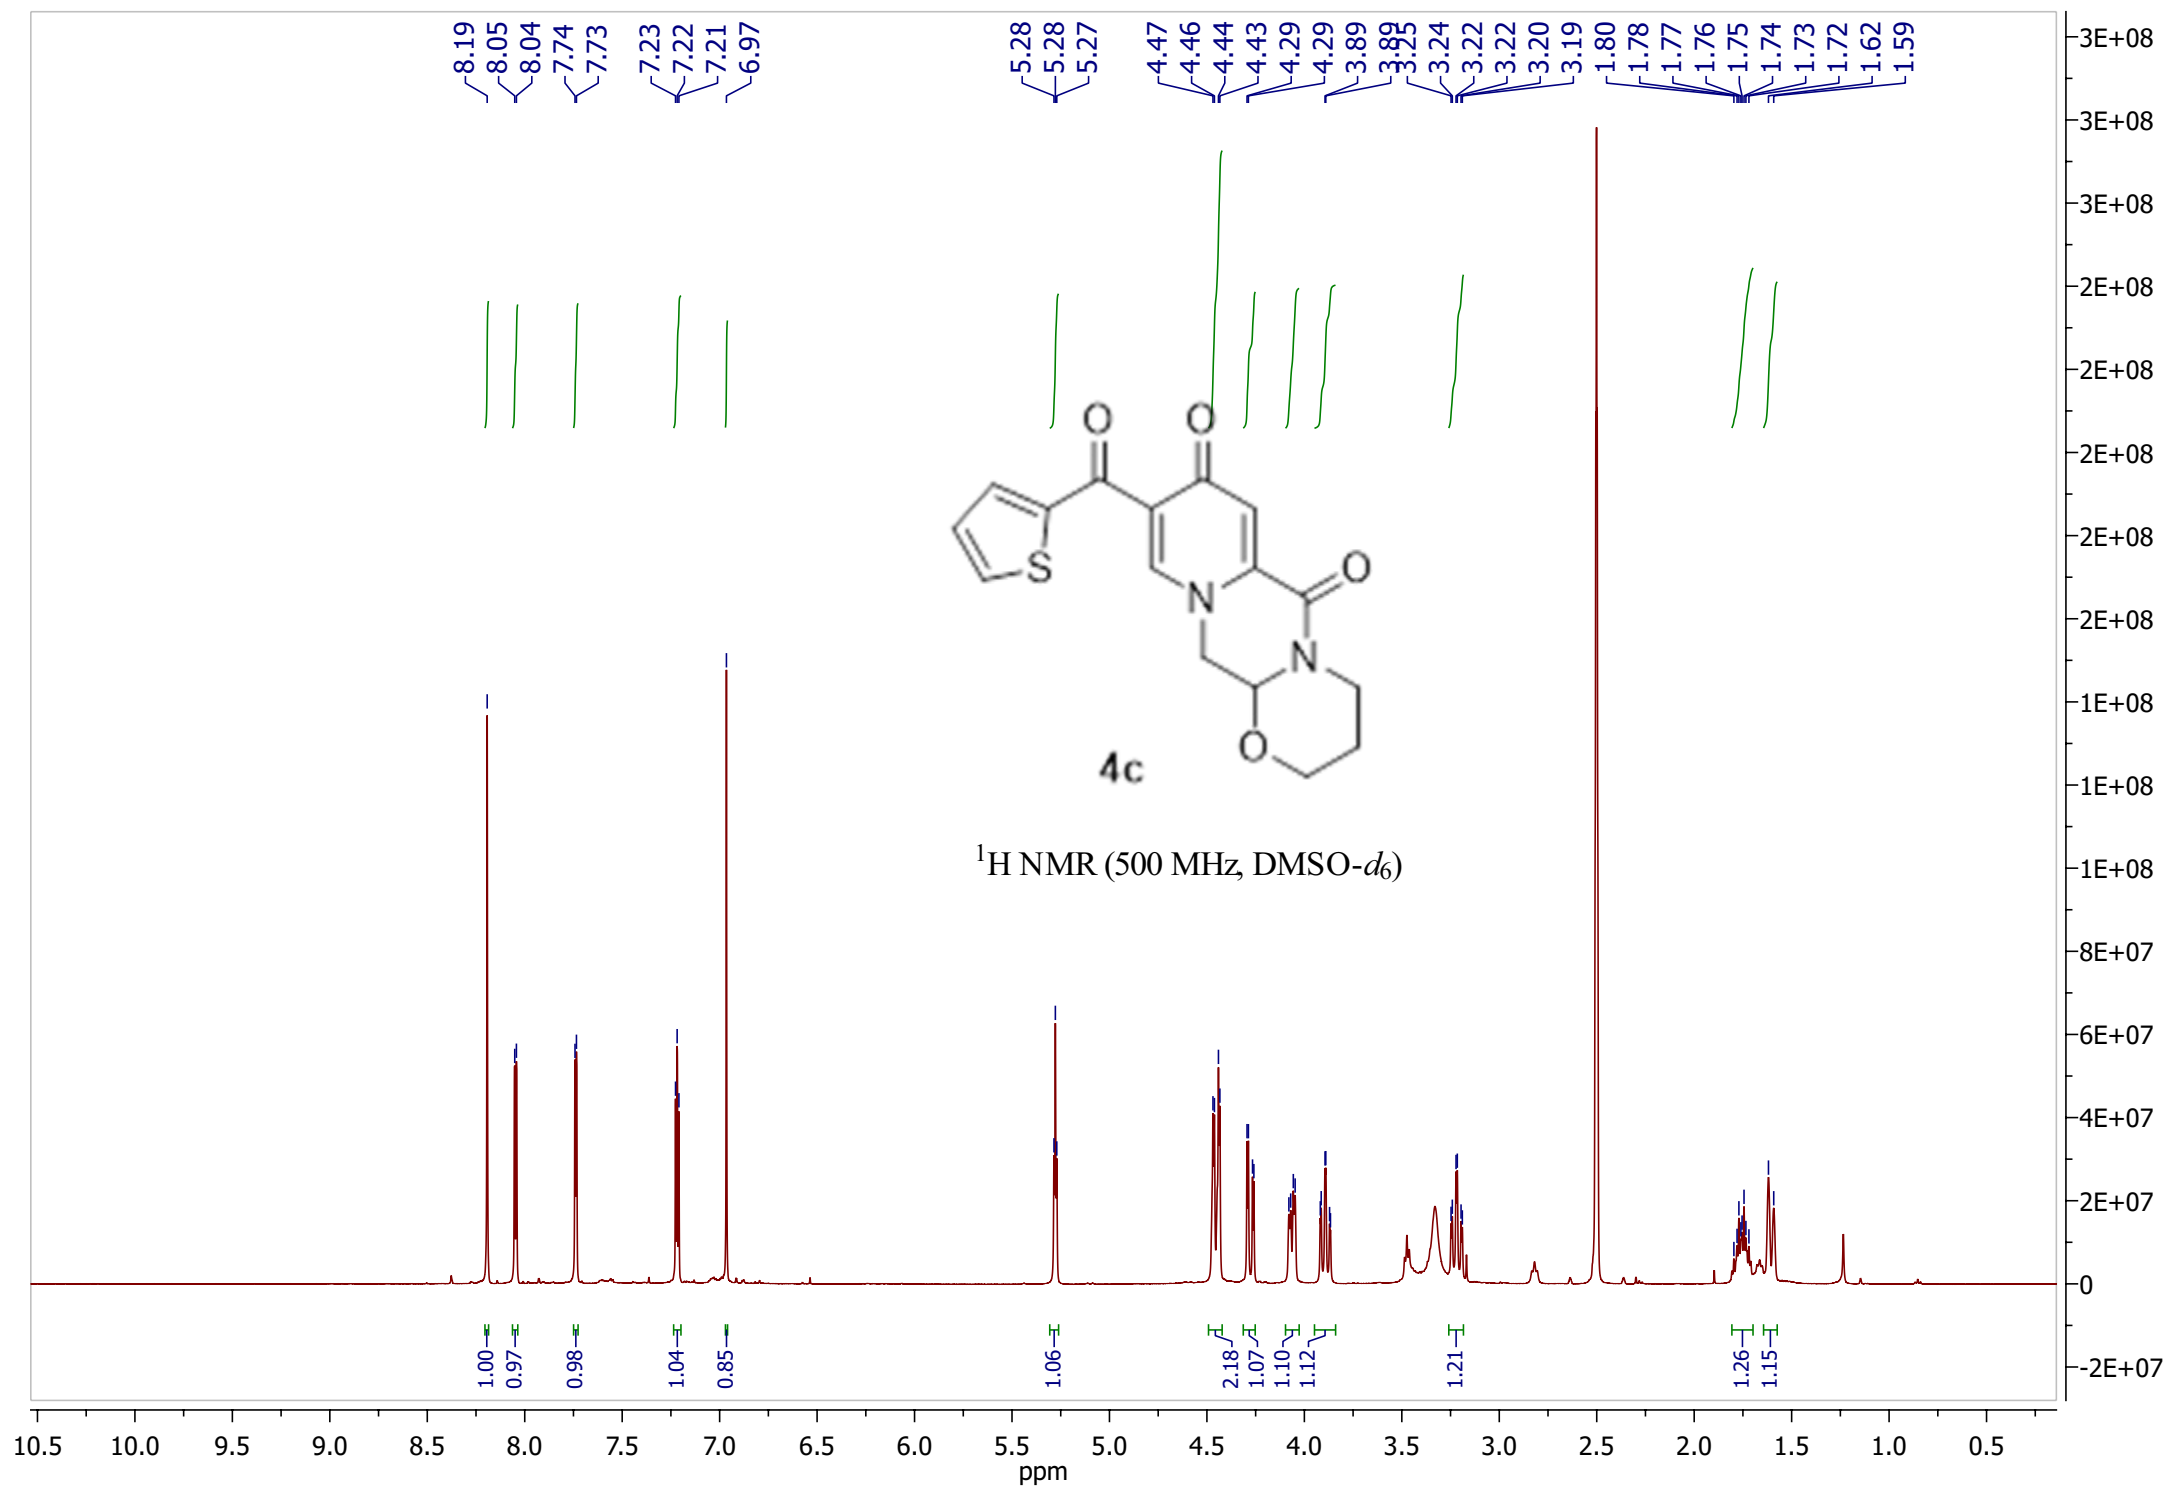

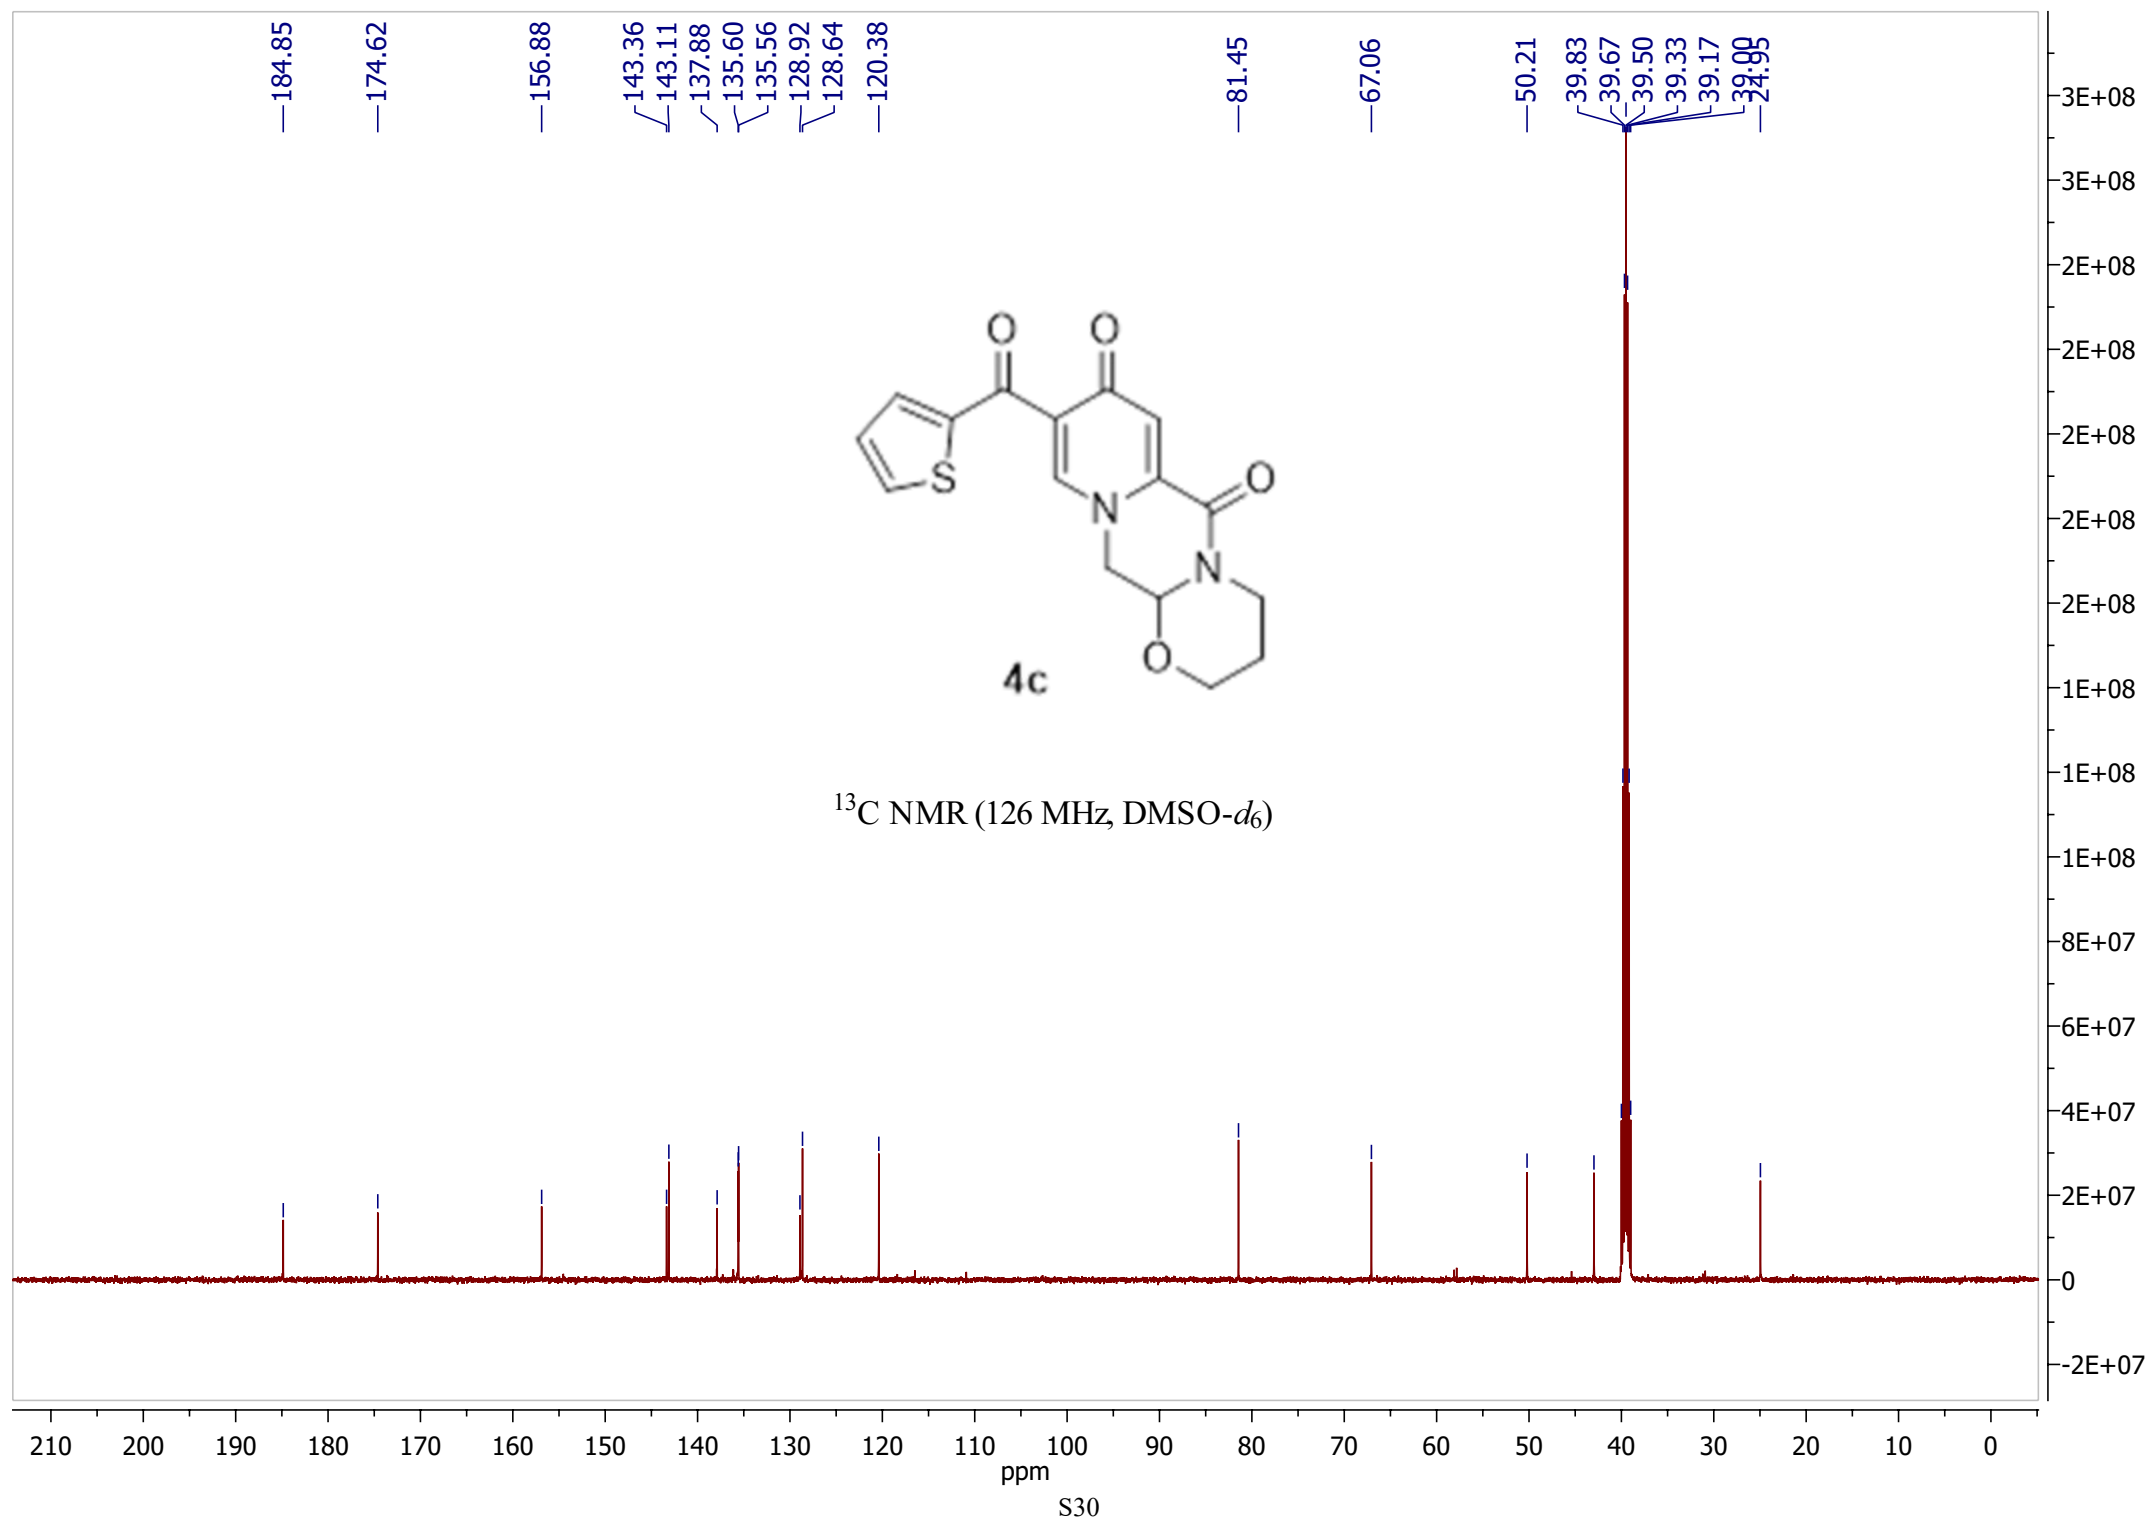

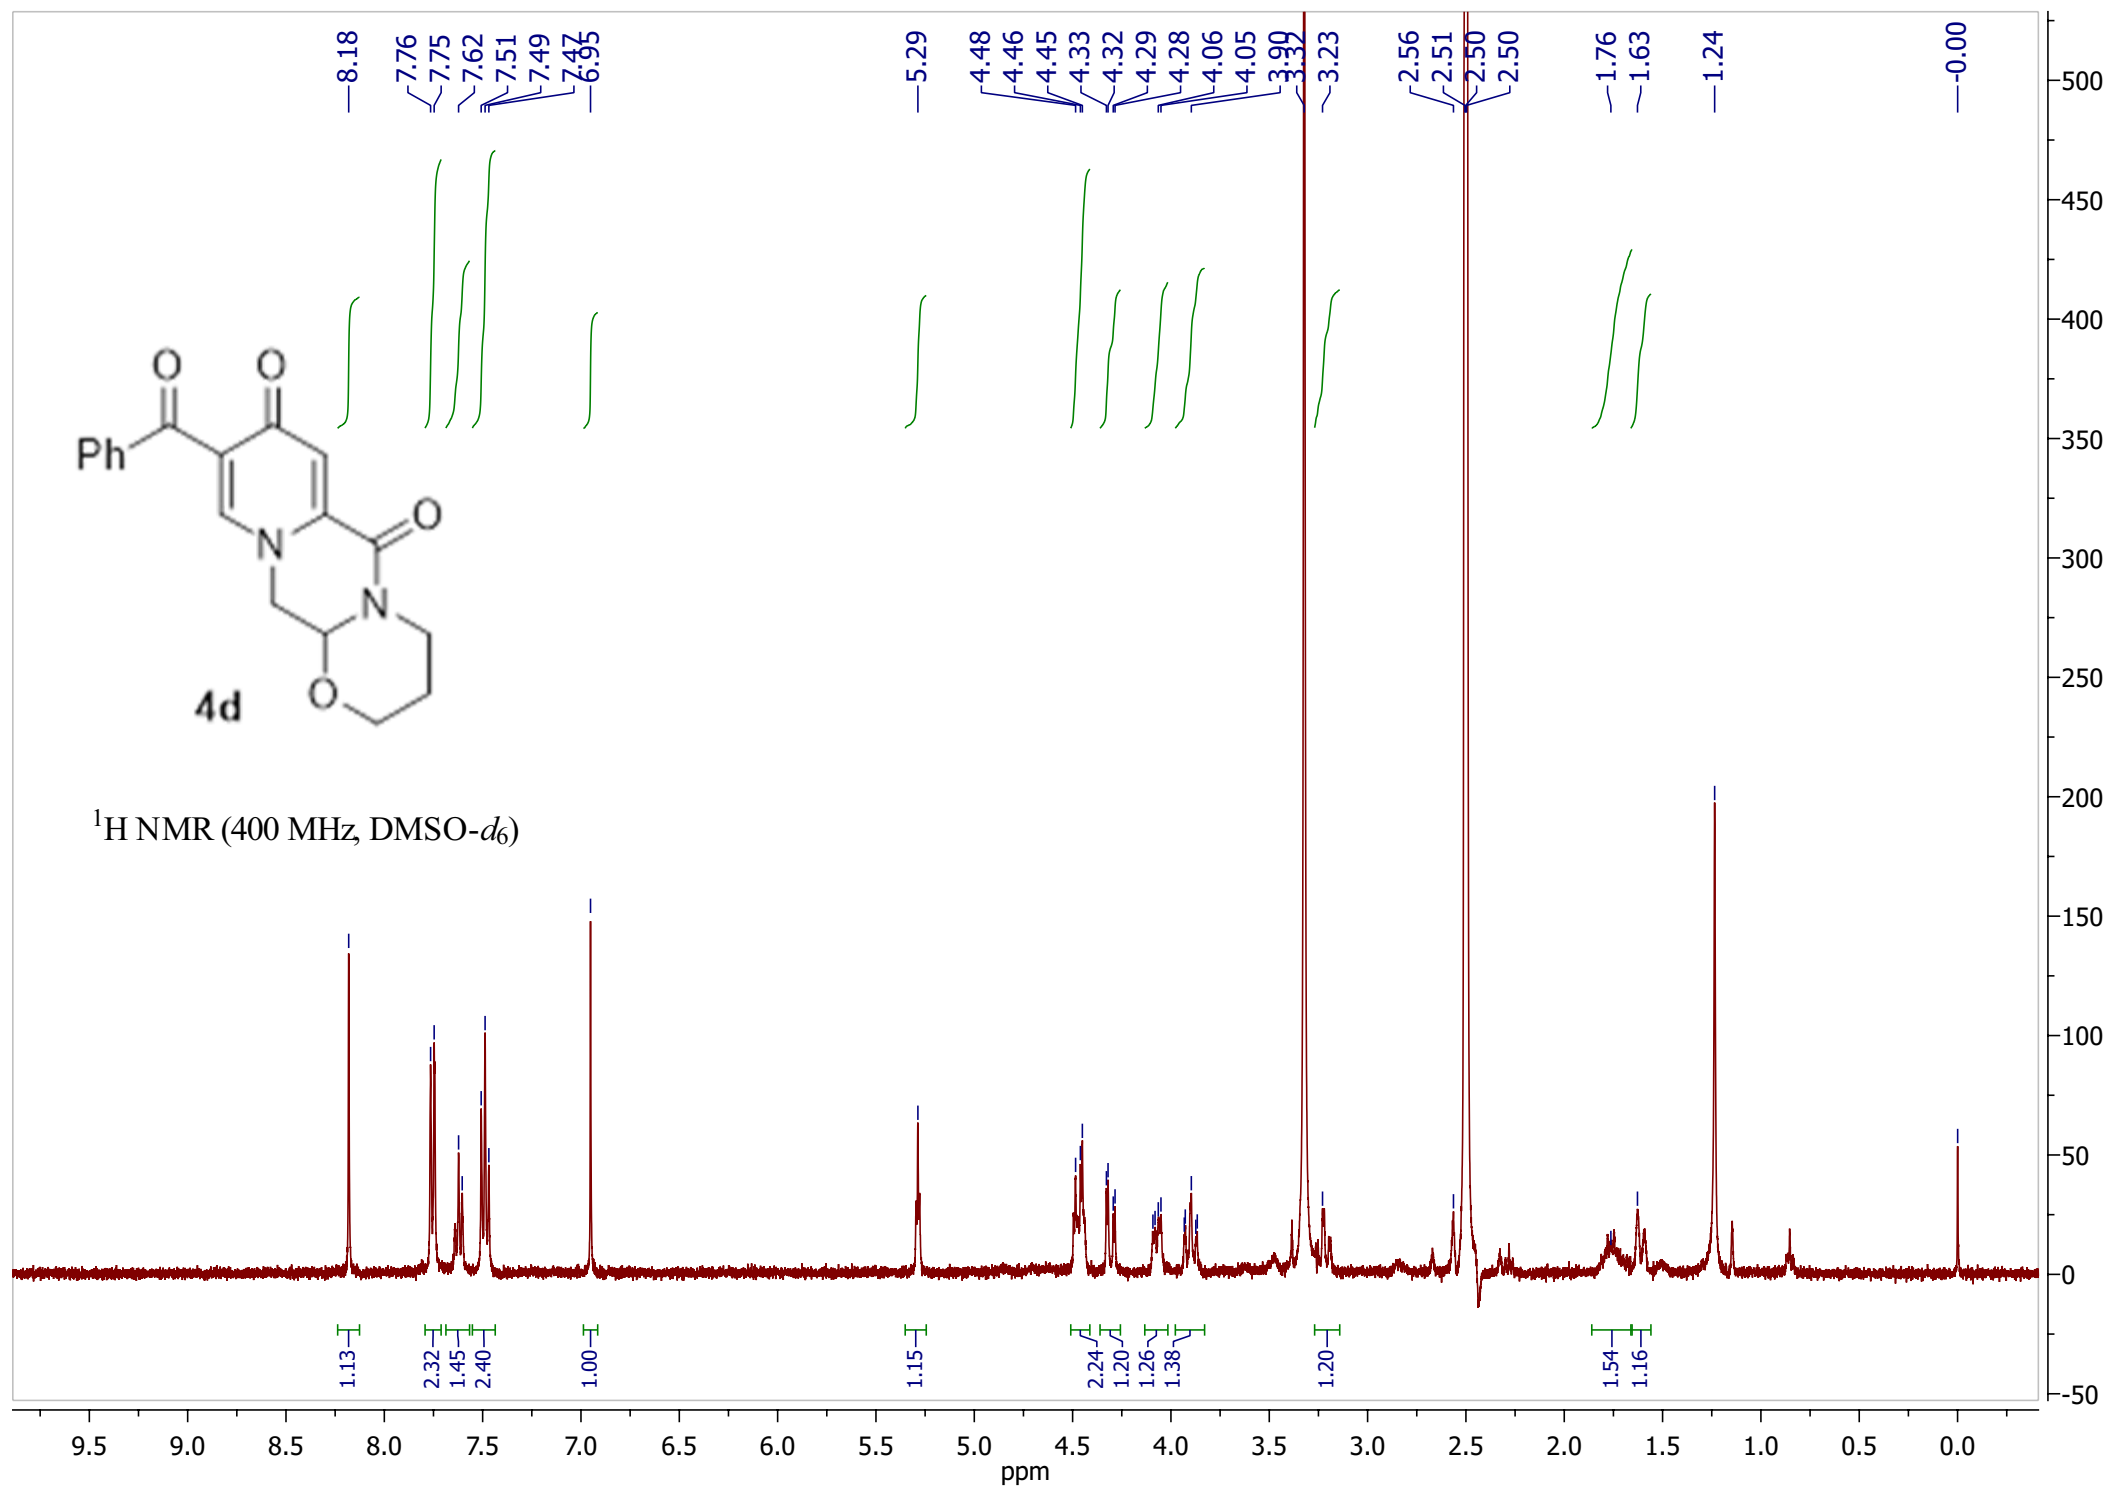

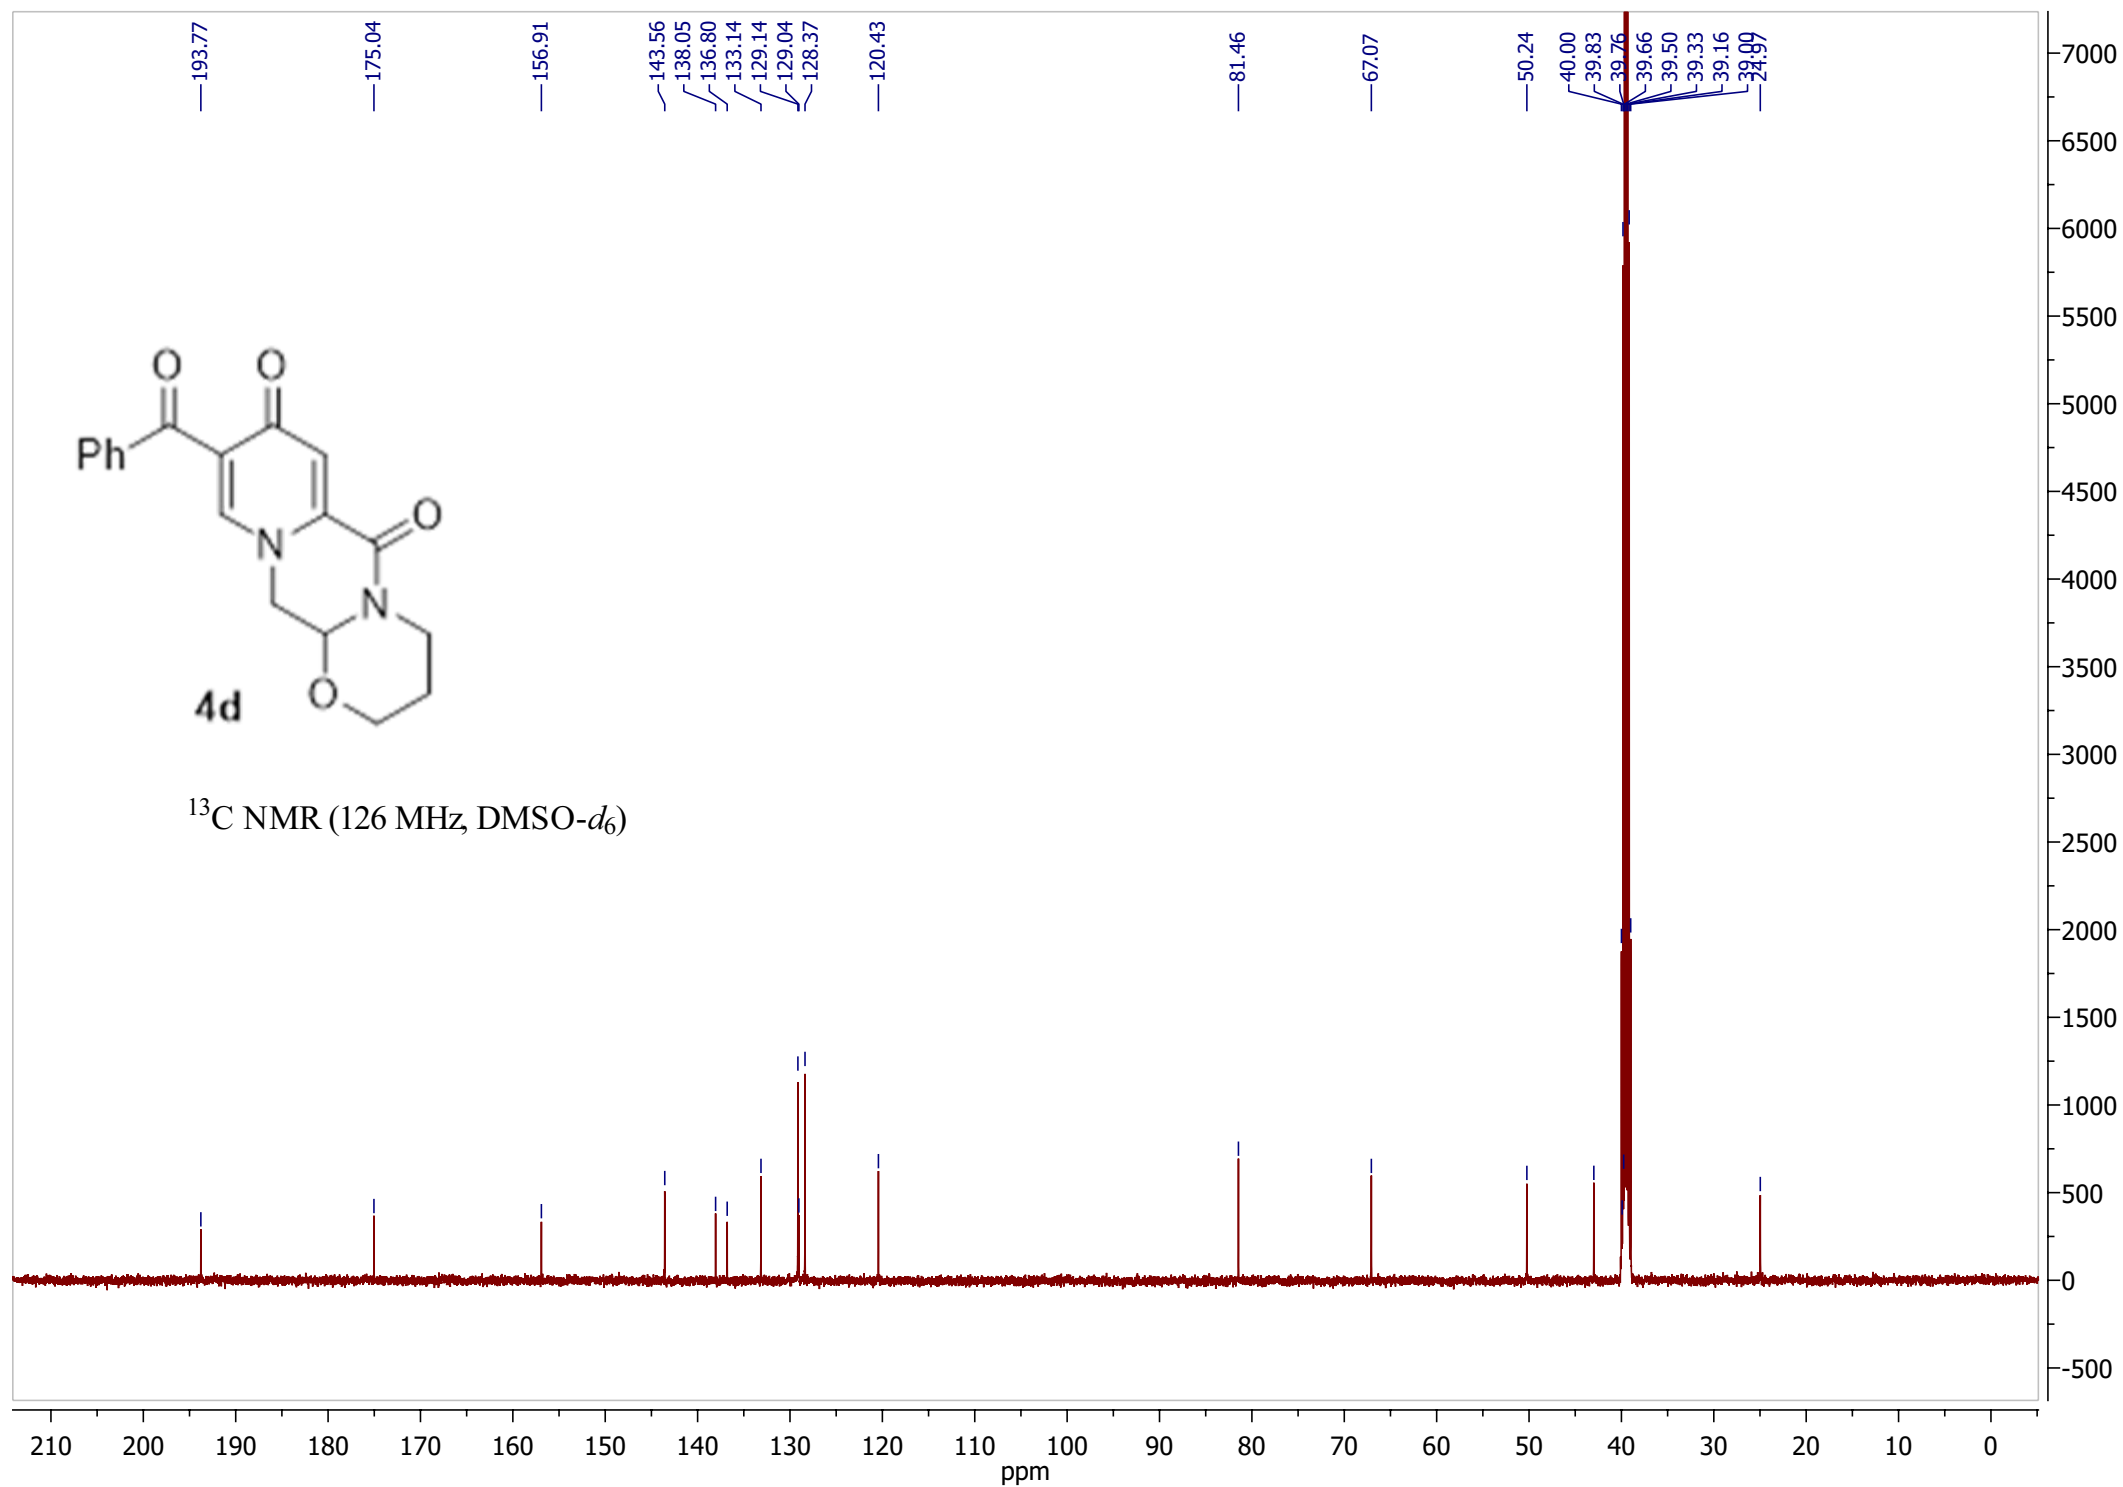

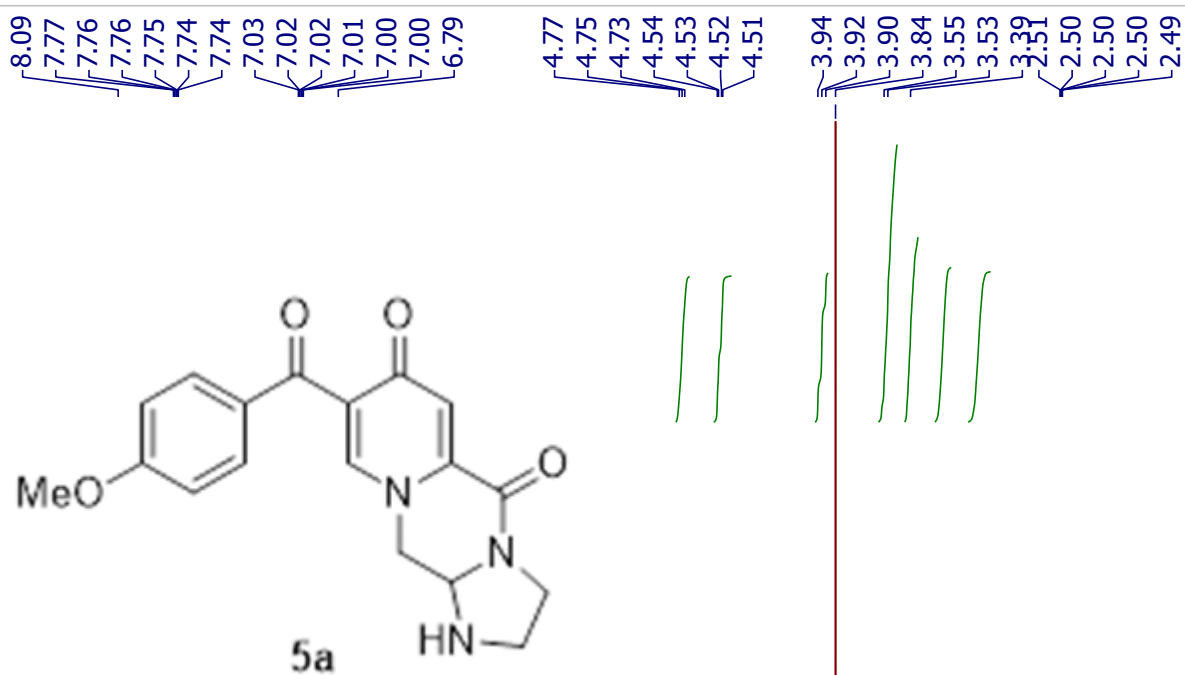

$^1\text{H}$  NMR (500 MHz, DMSO- $d_6$ )

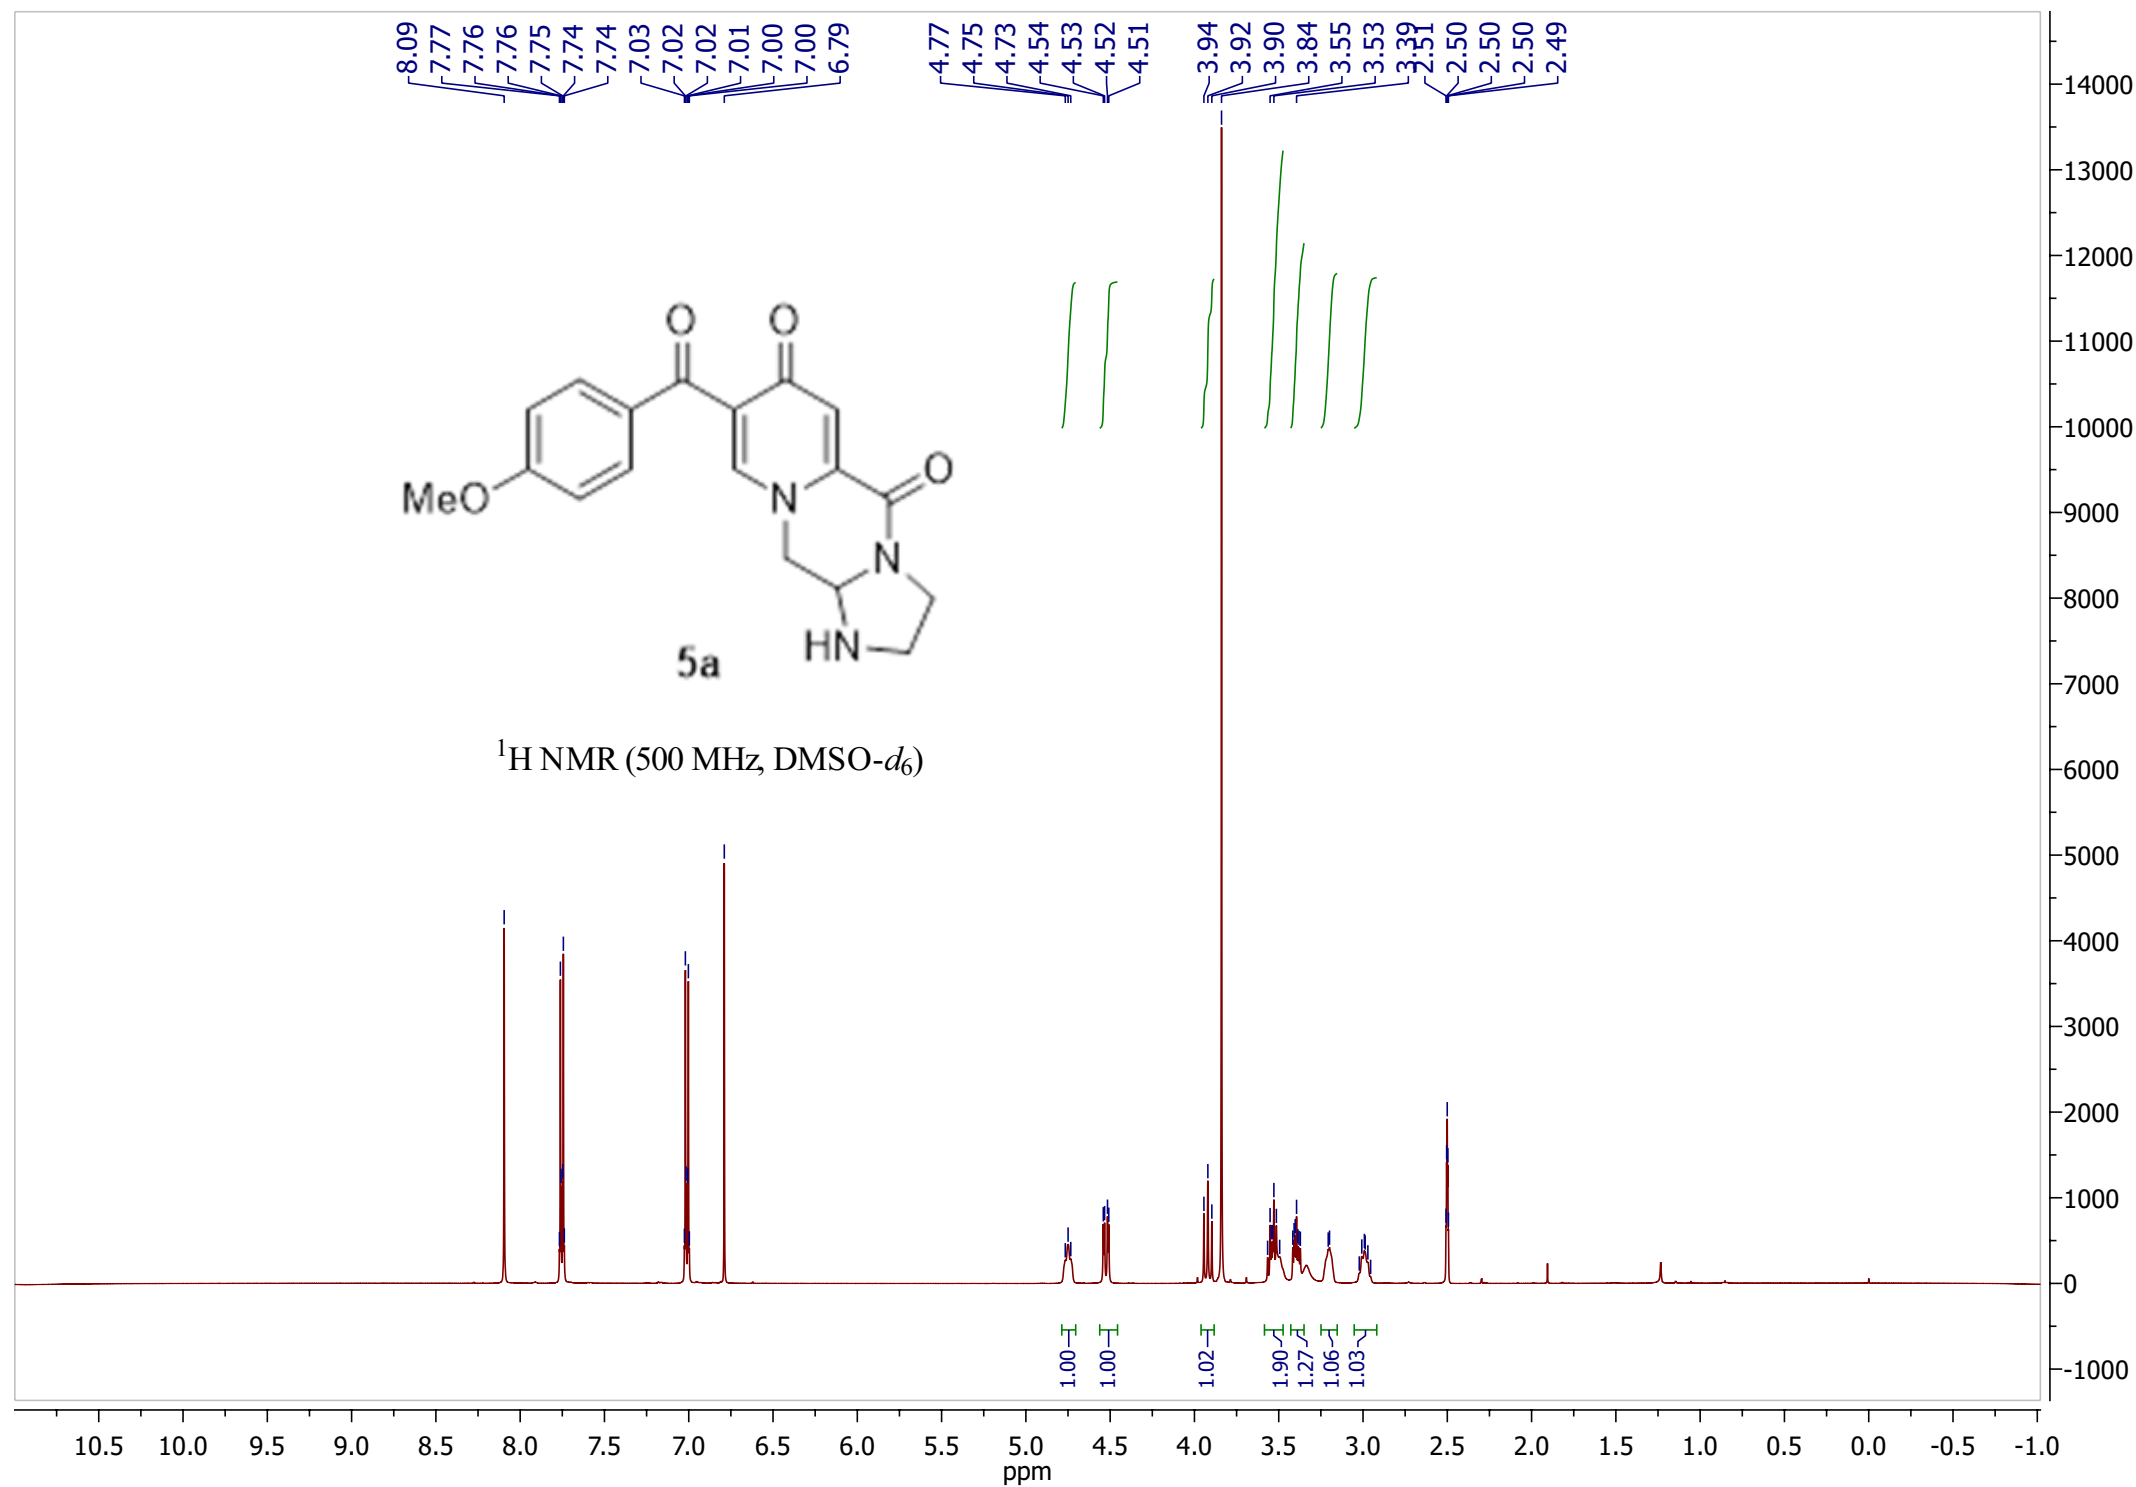

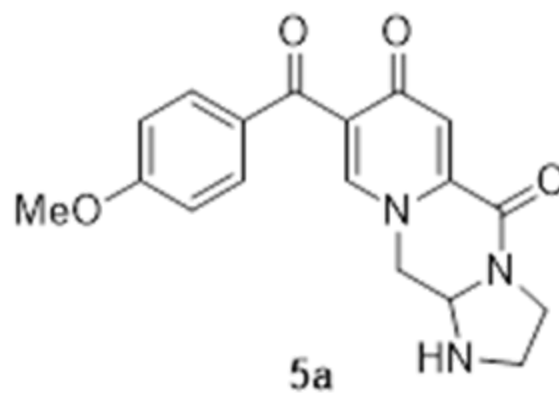

$^{13}\text{C}$  NMR (126 MHz, DMSO- $d_6$ )

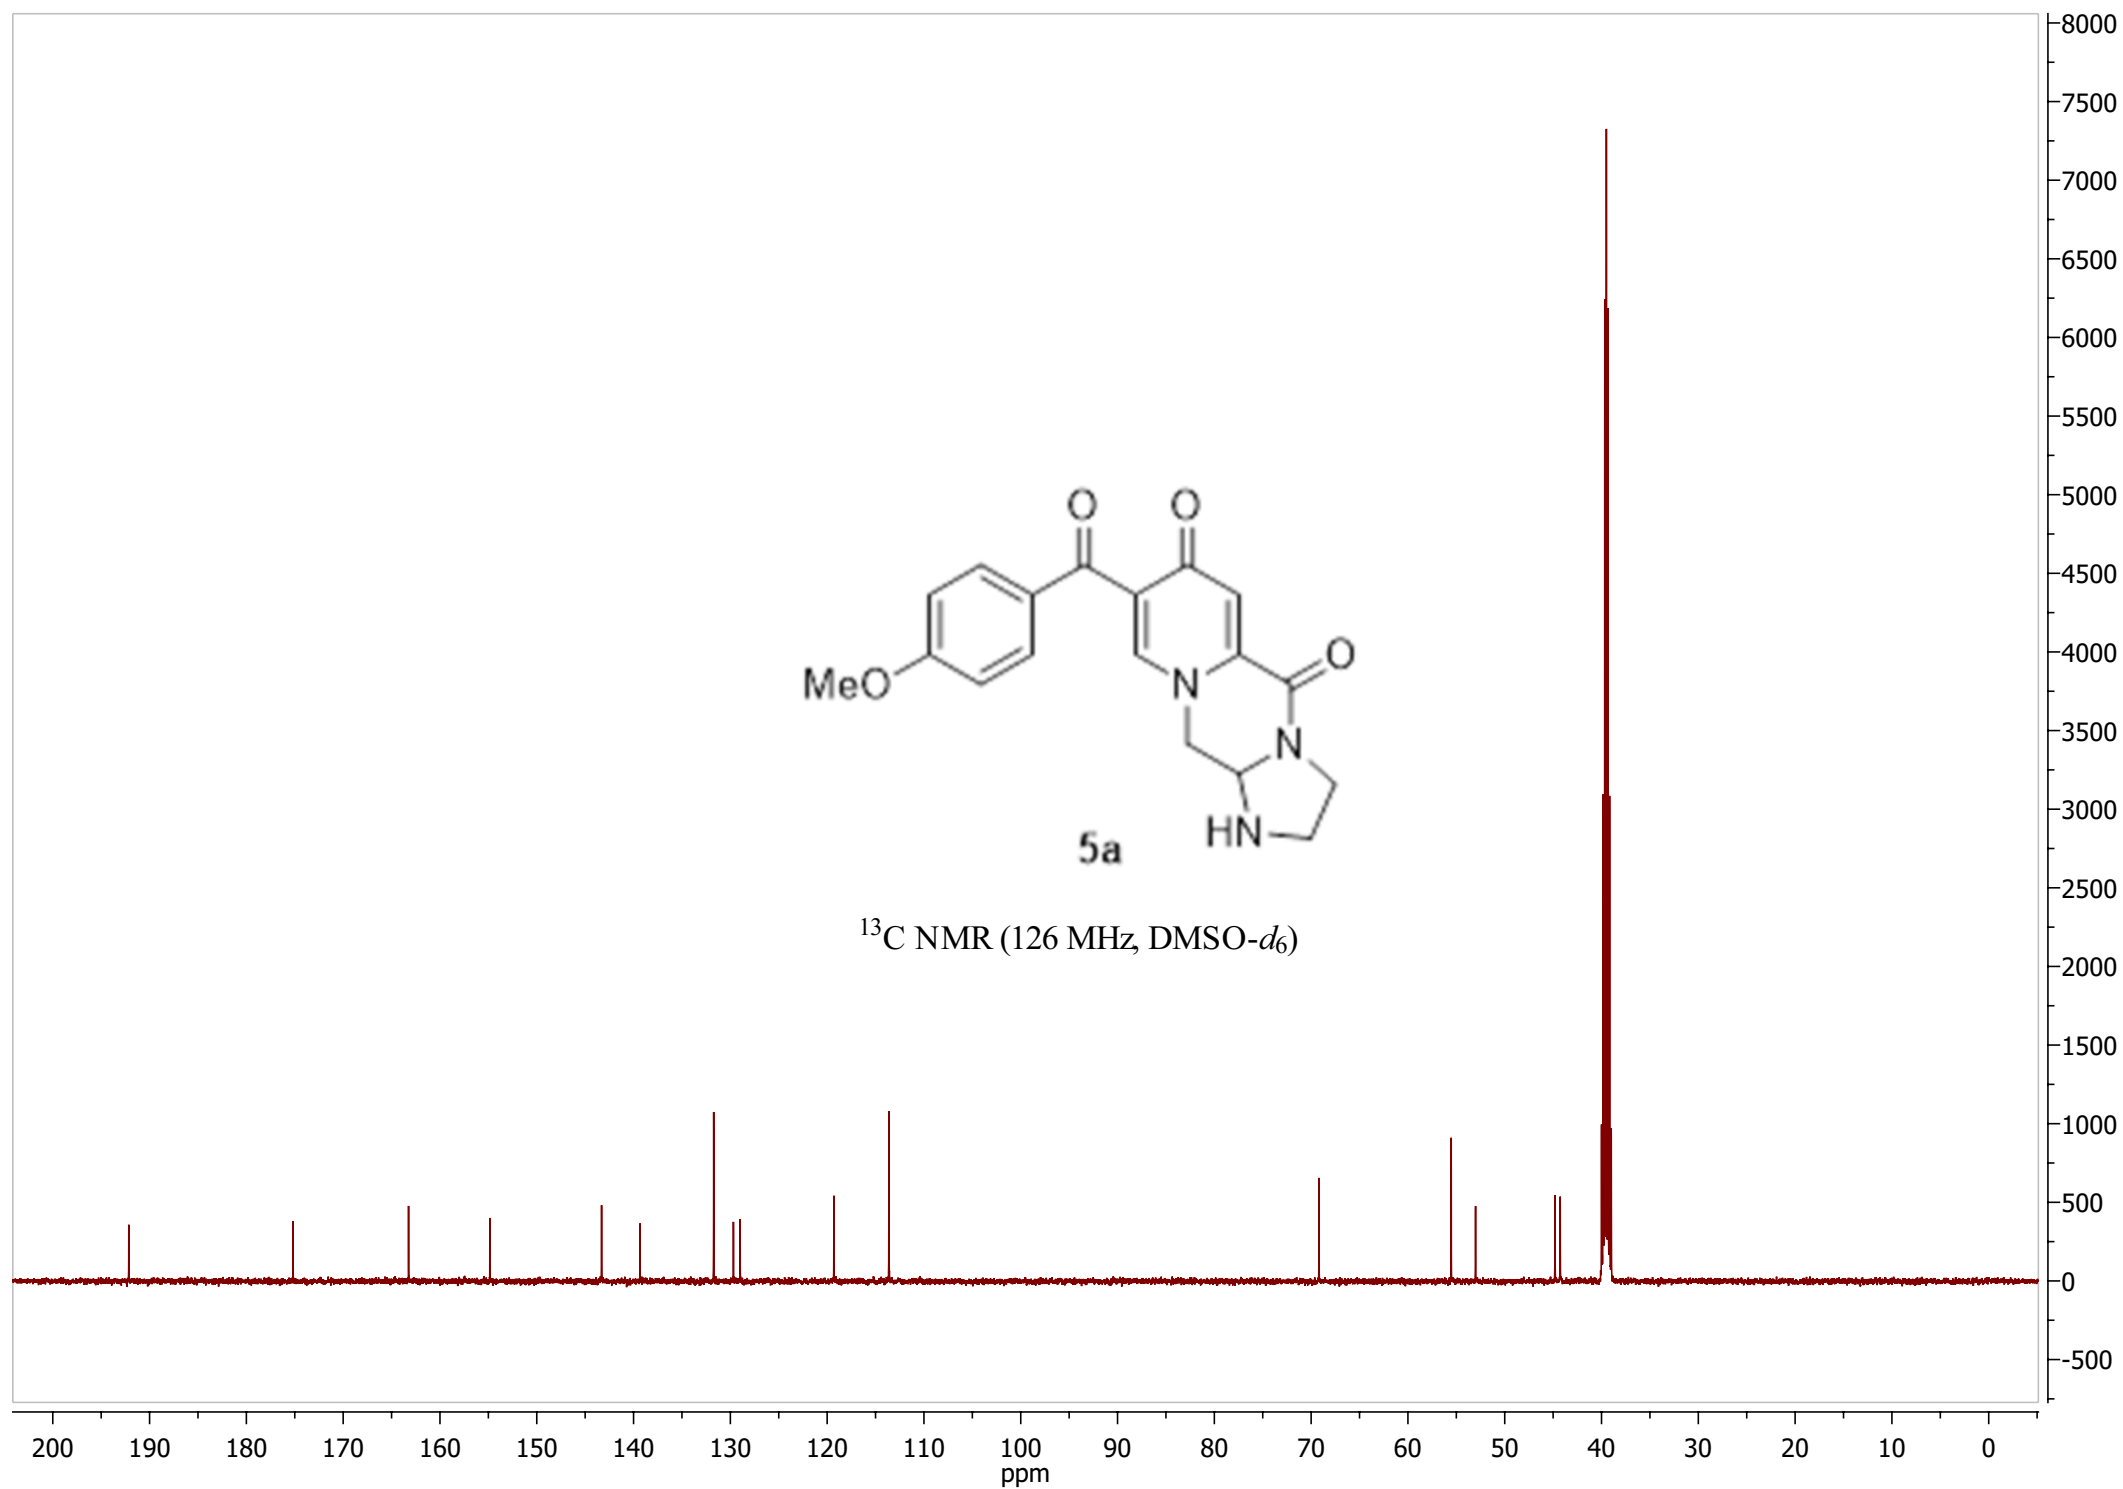

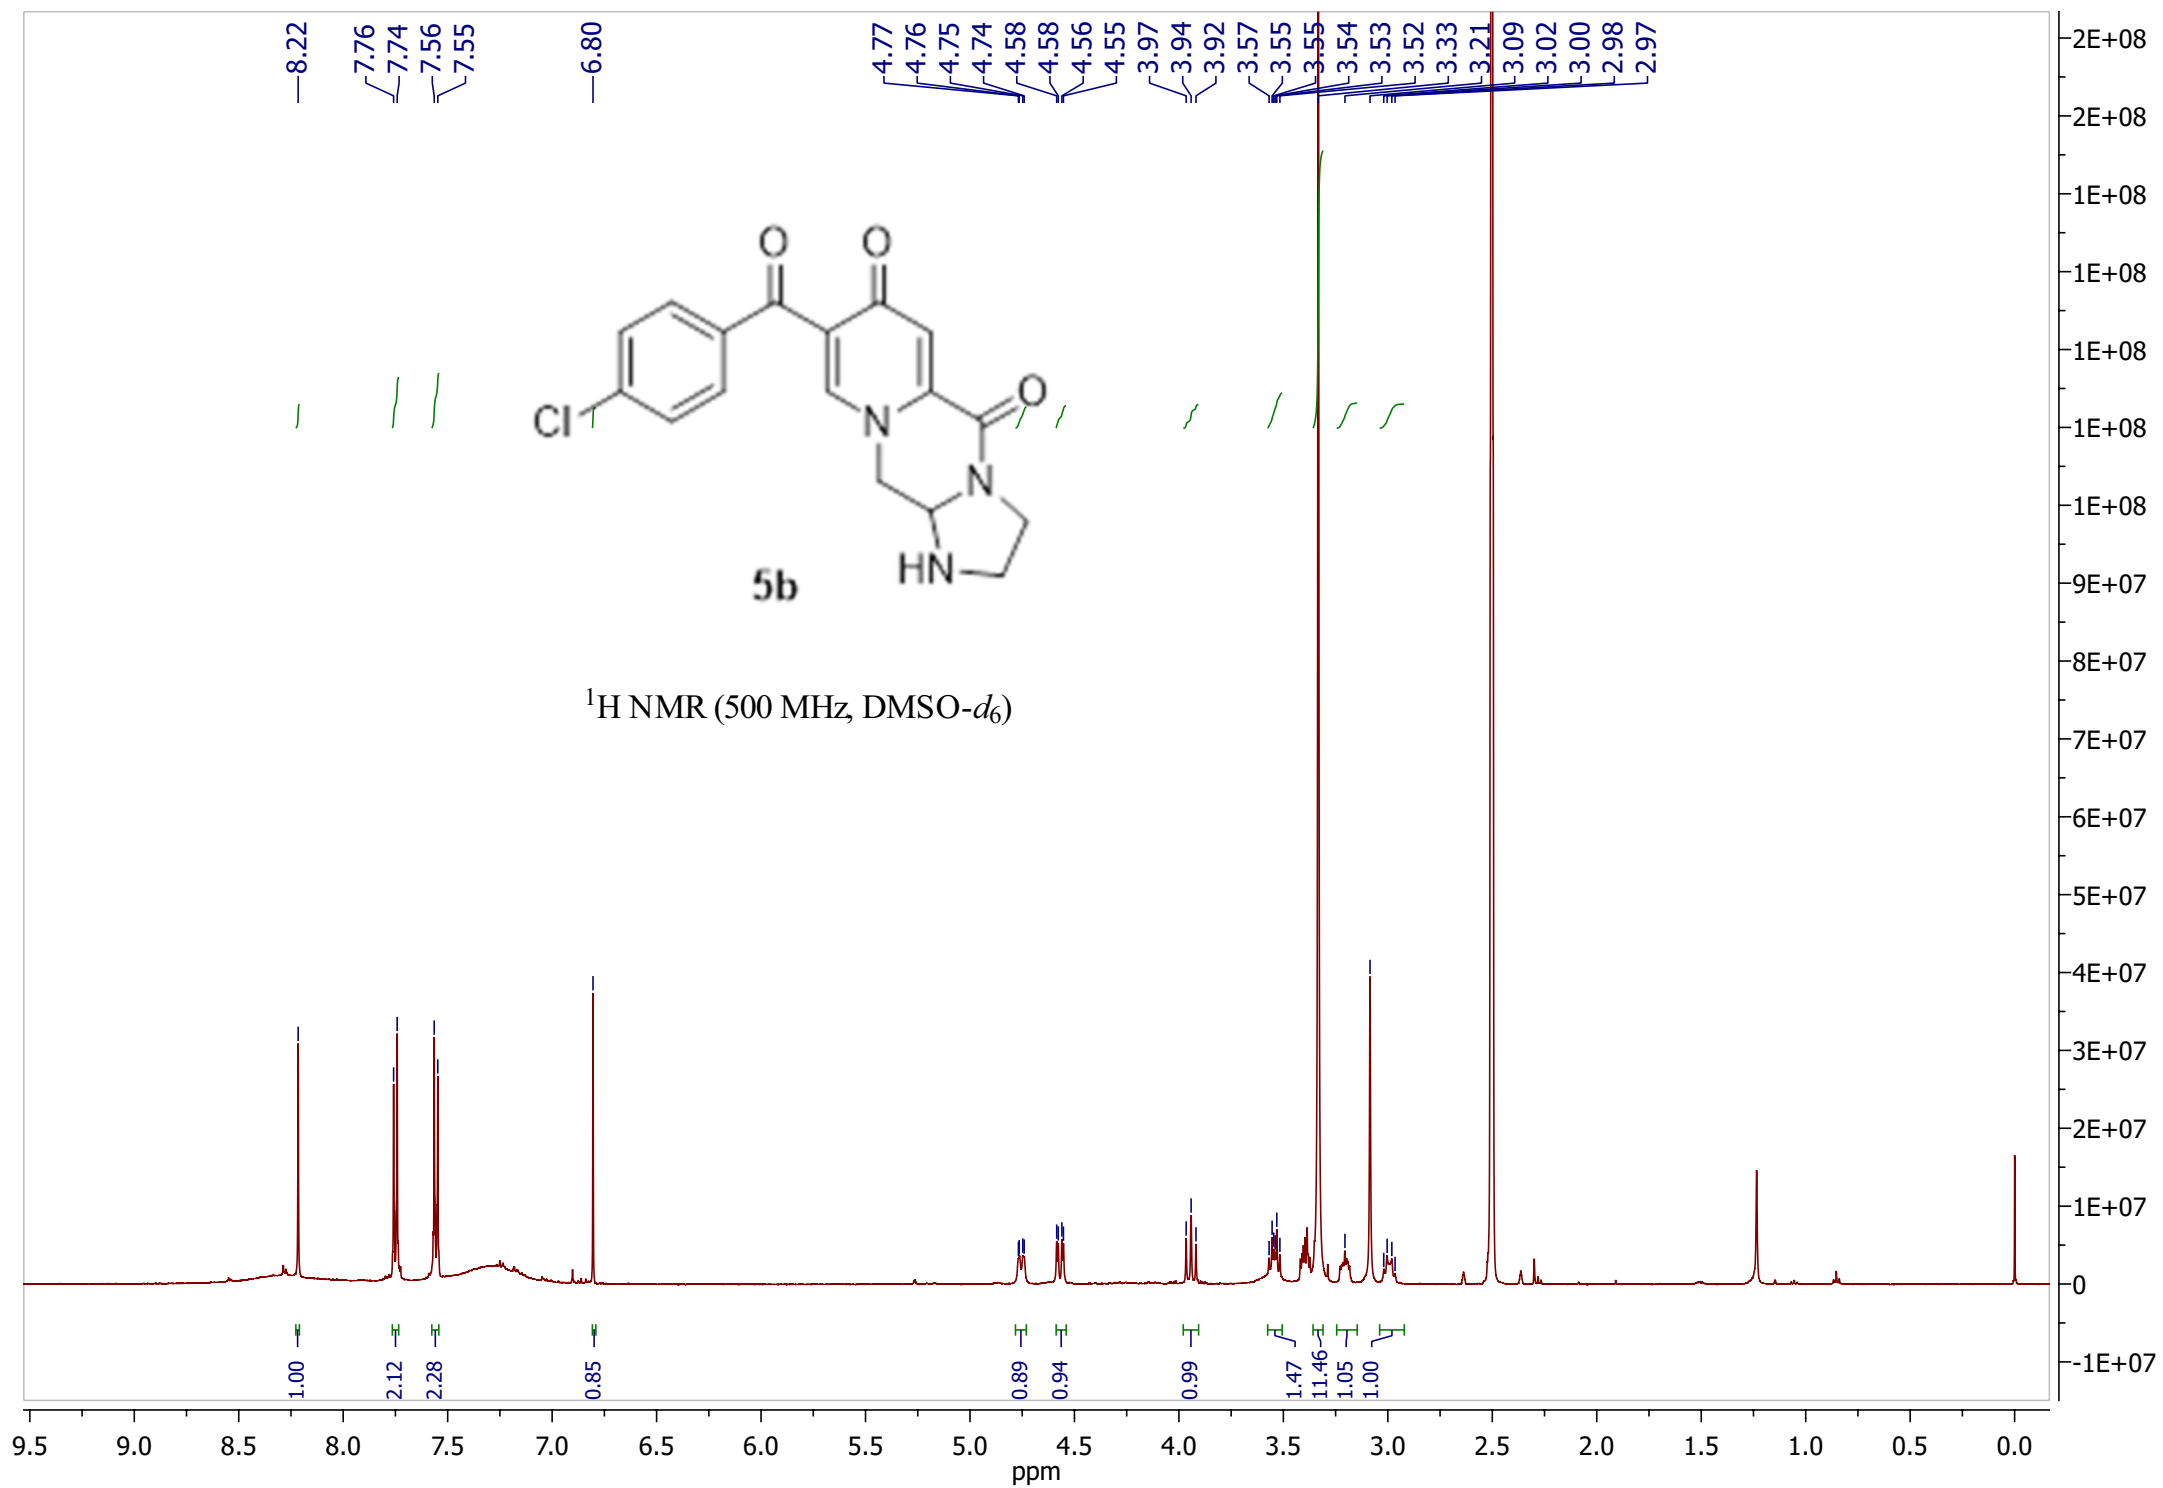

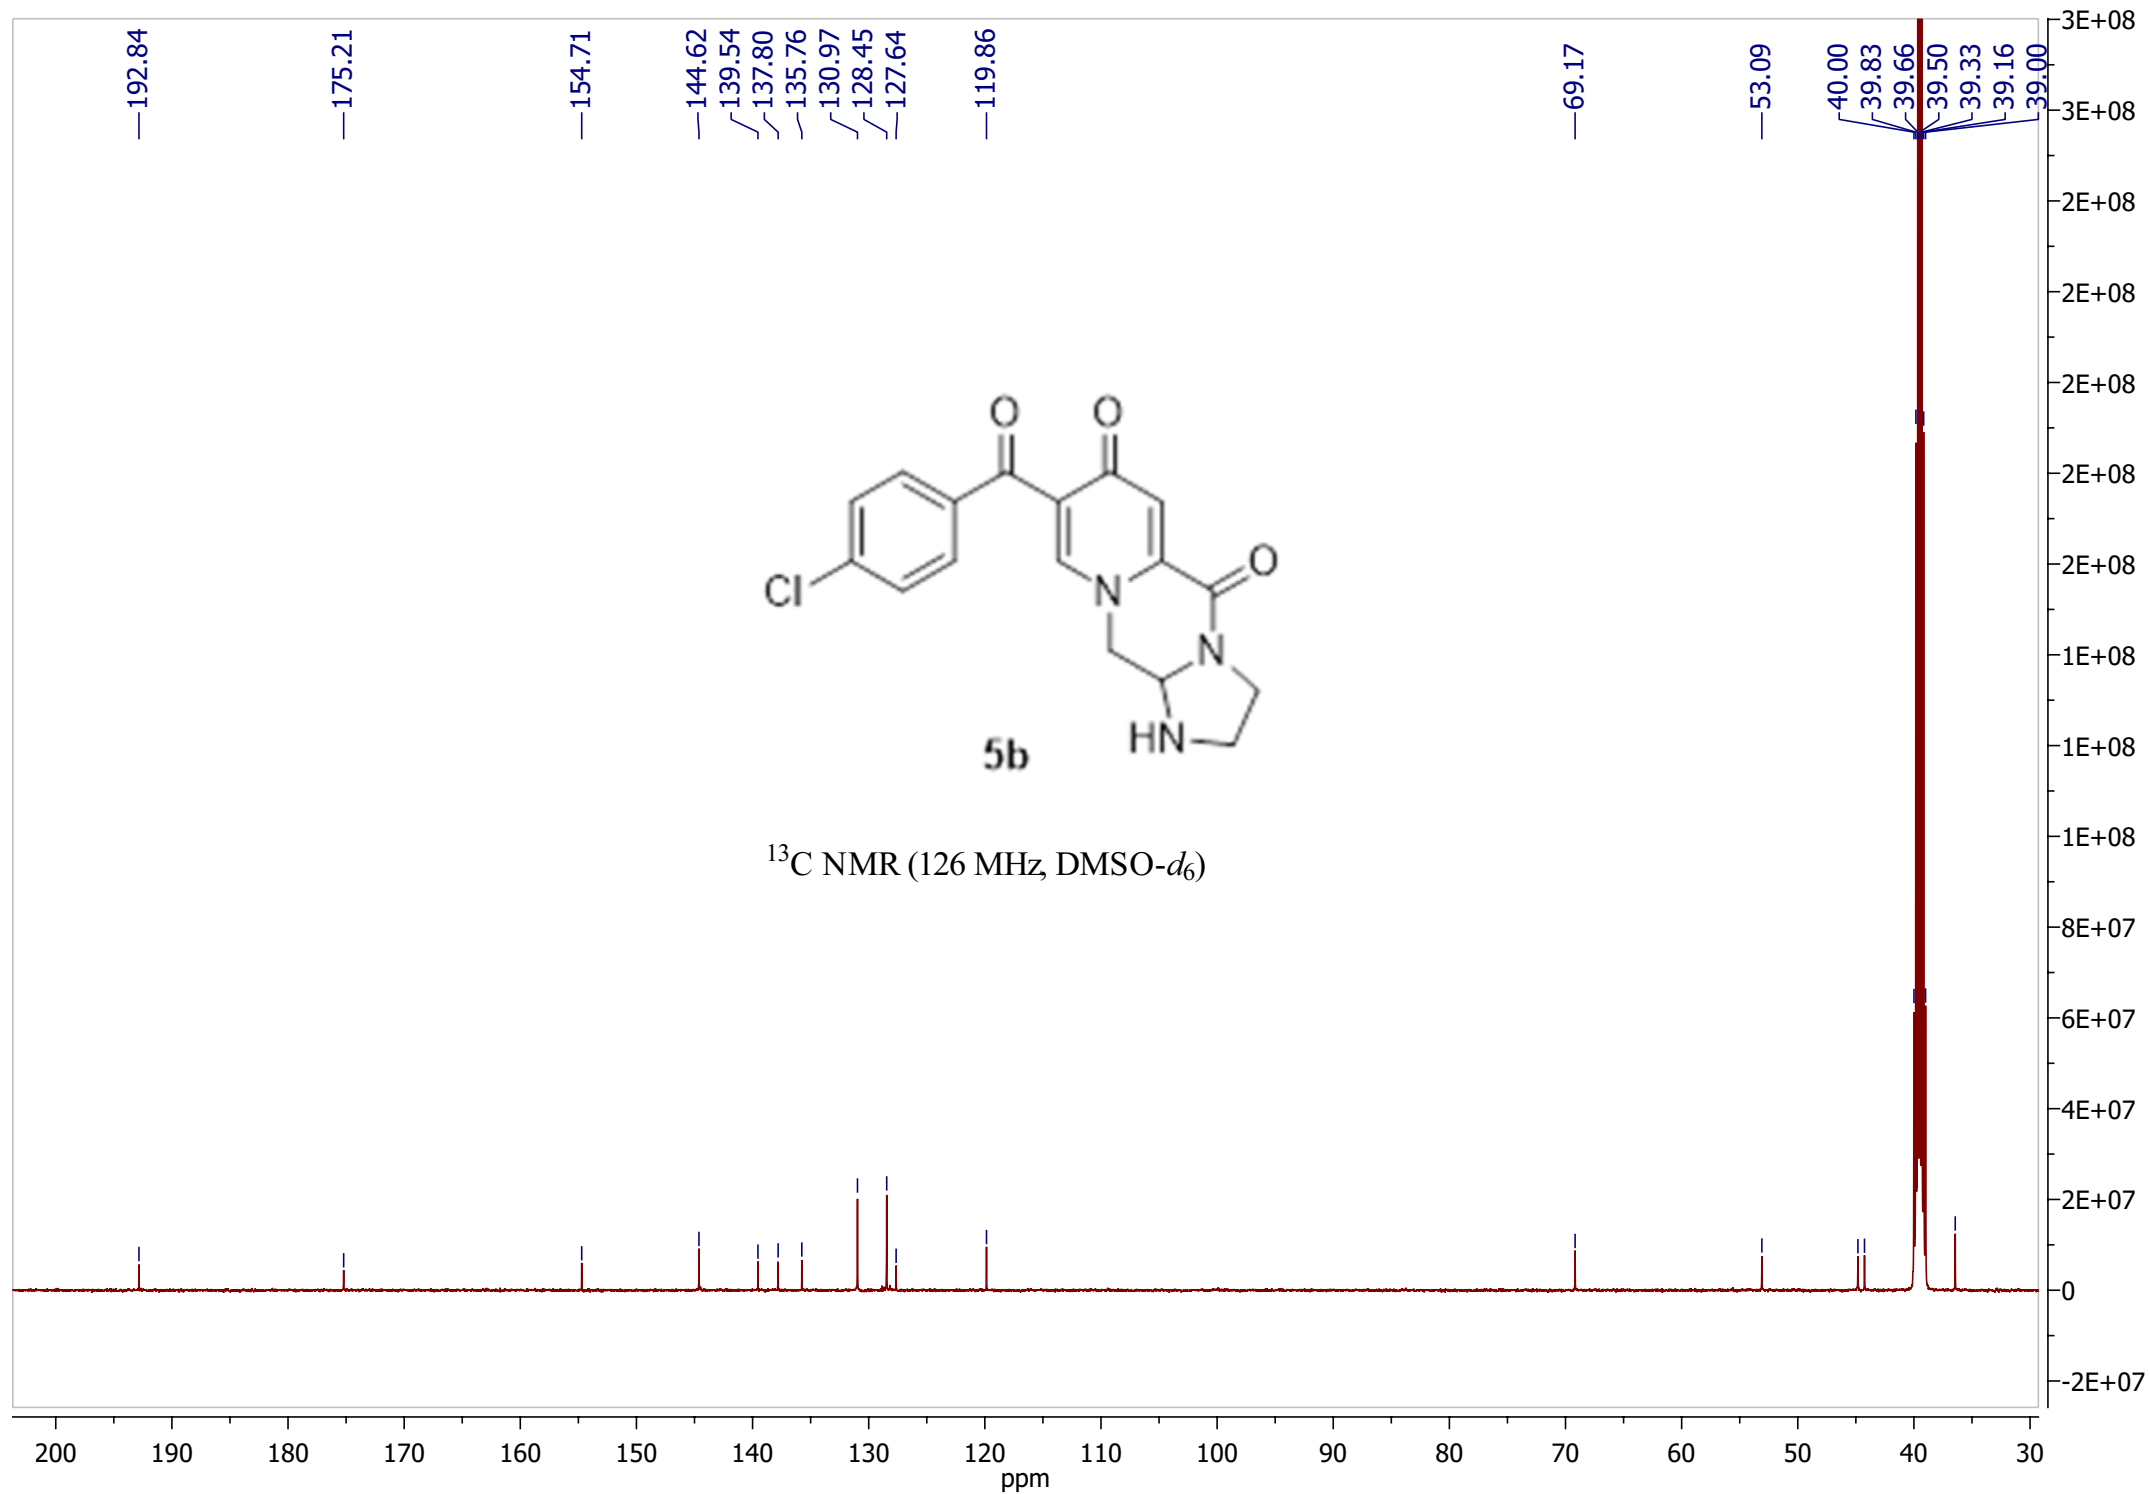



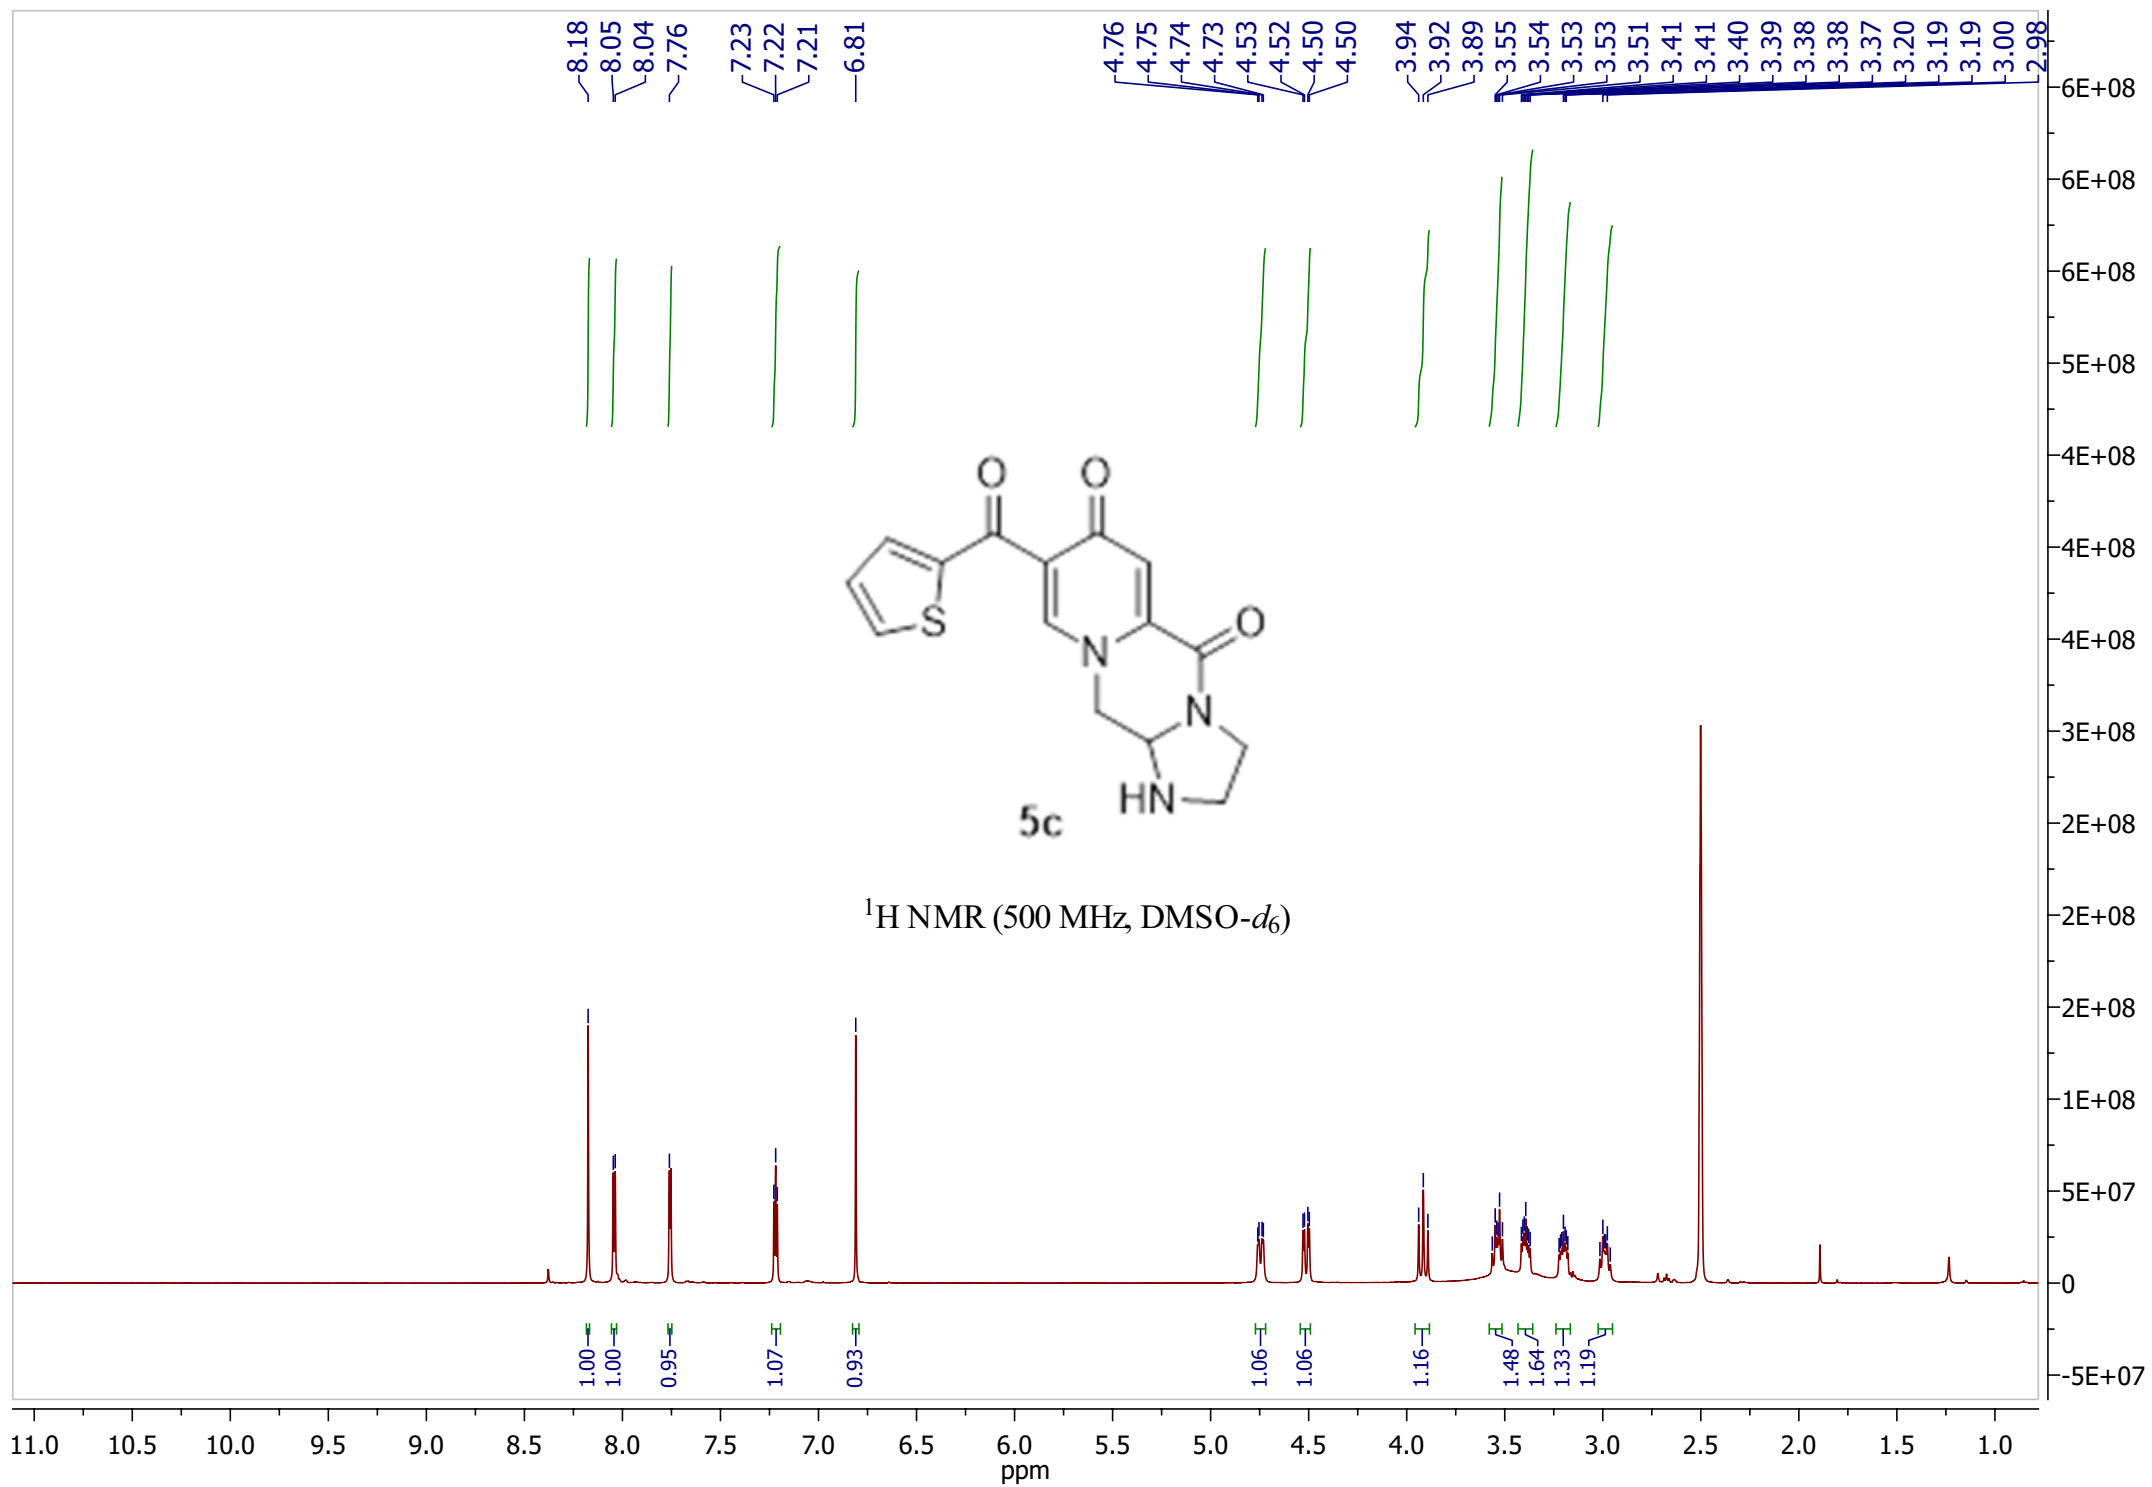

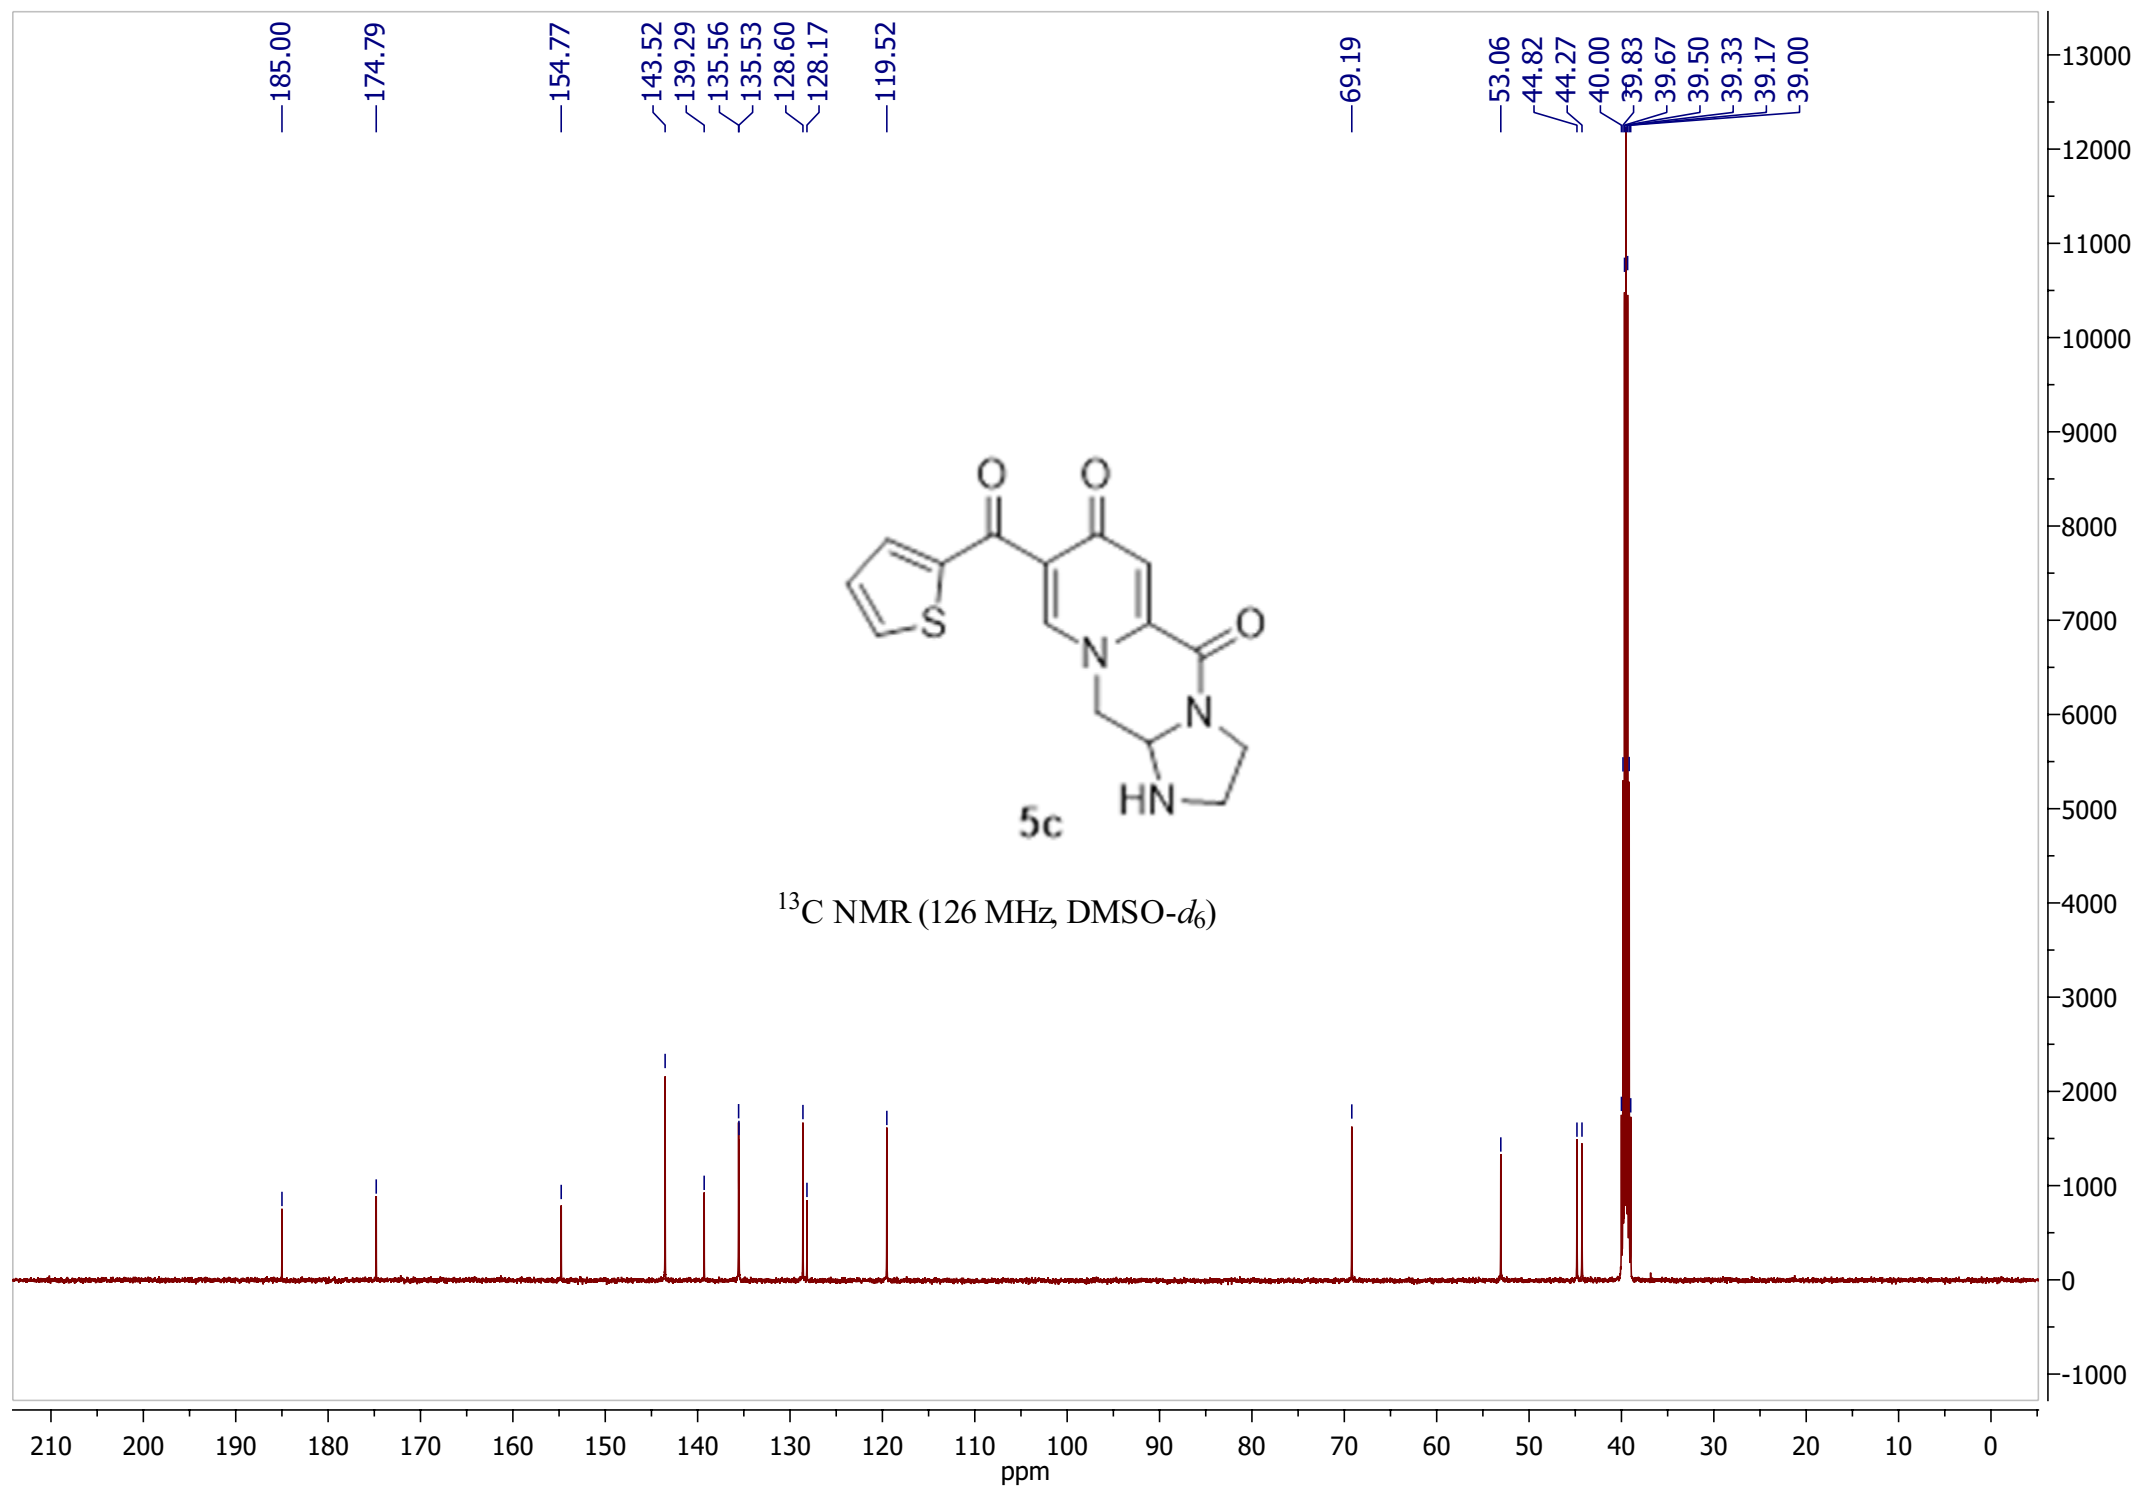

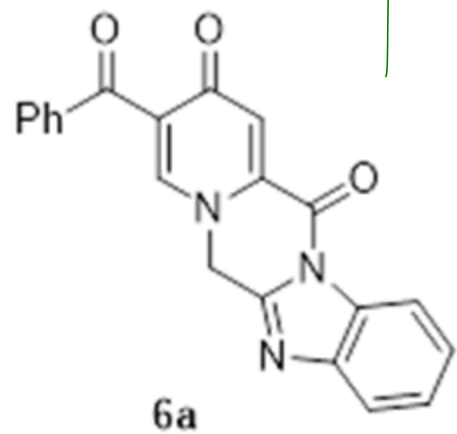

$^1\text{H}$  NMR (500 MHz, DMSO- $d_6$ )

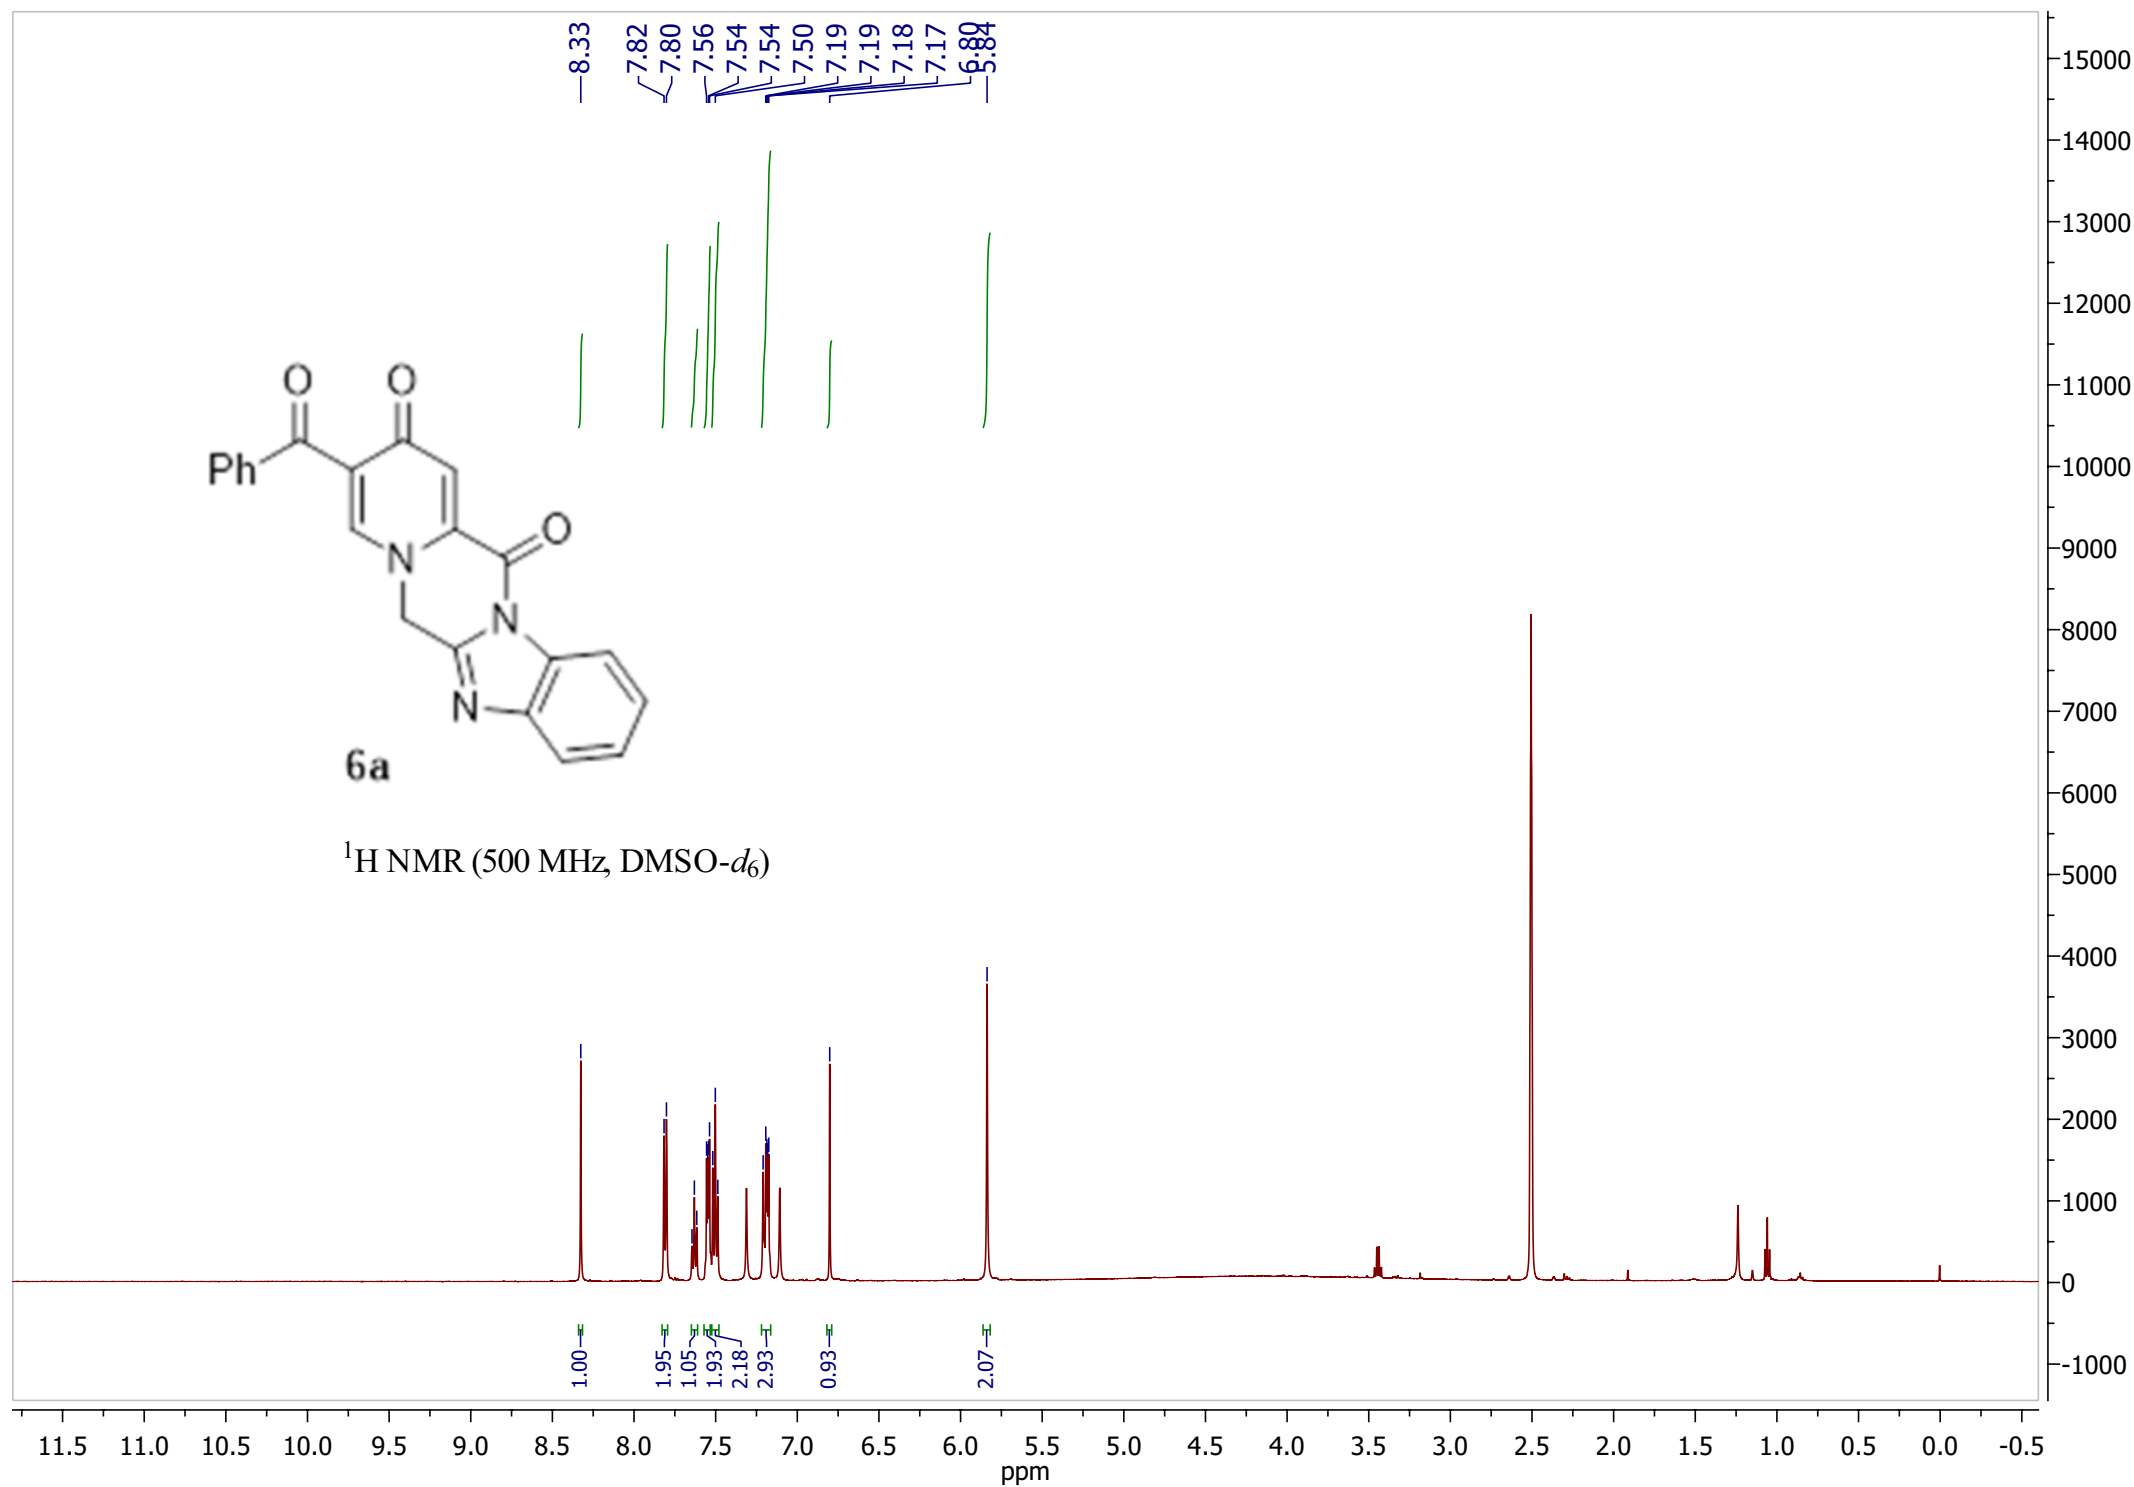

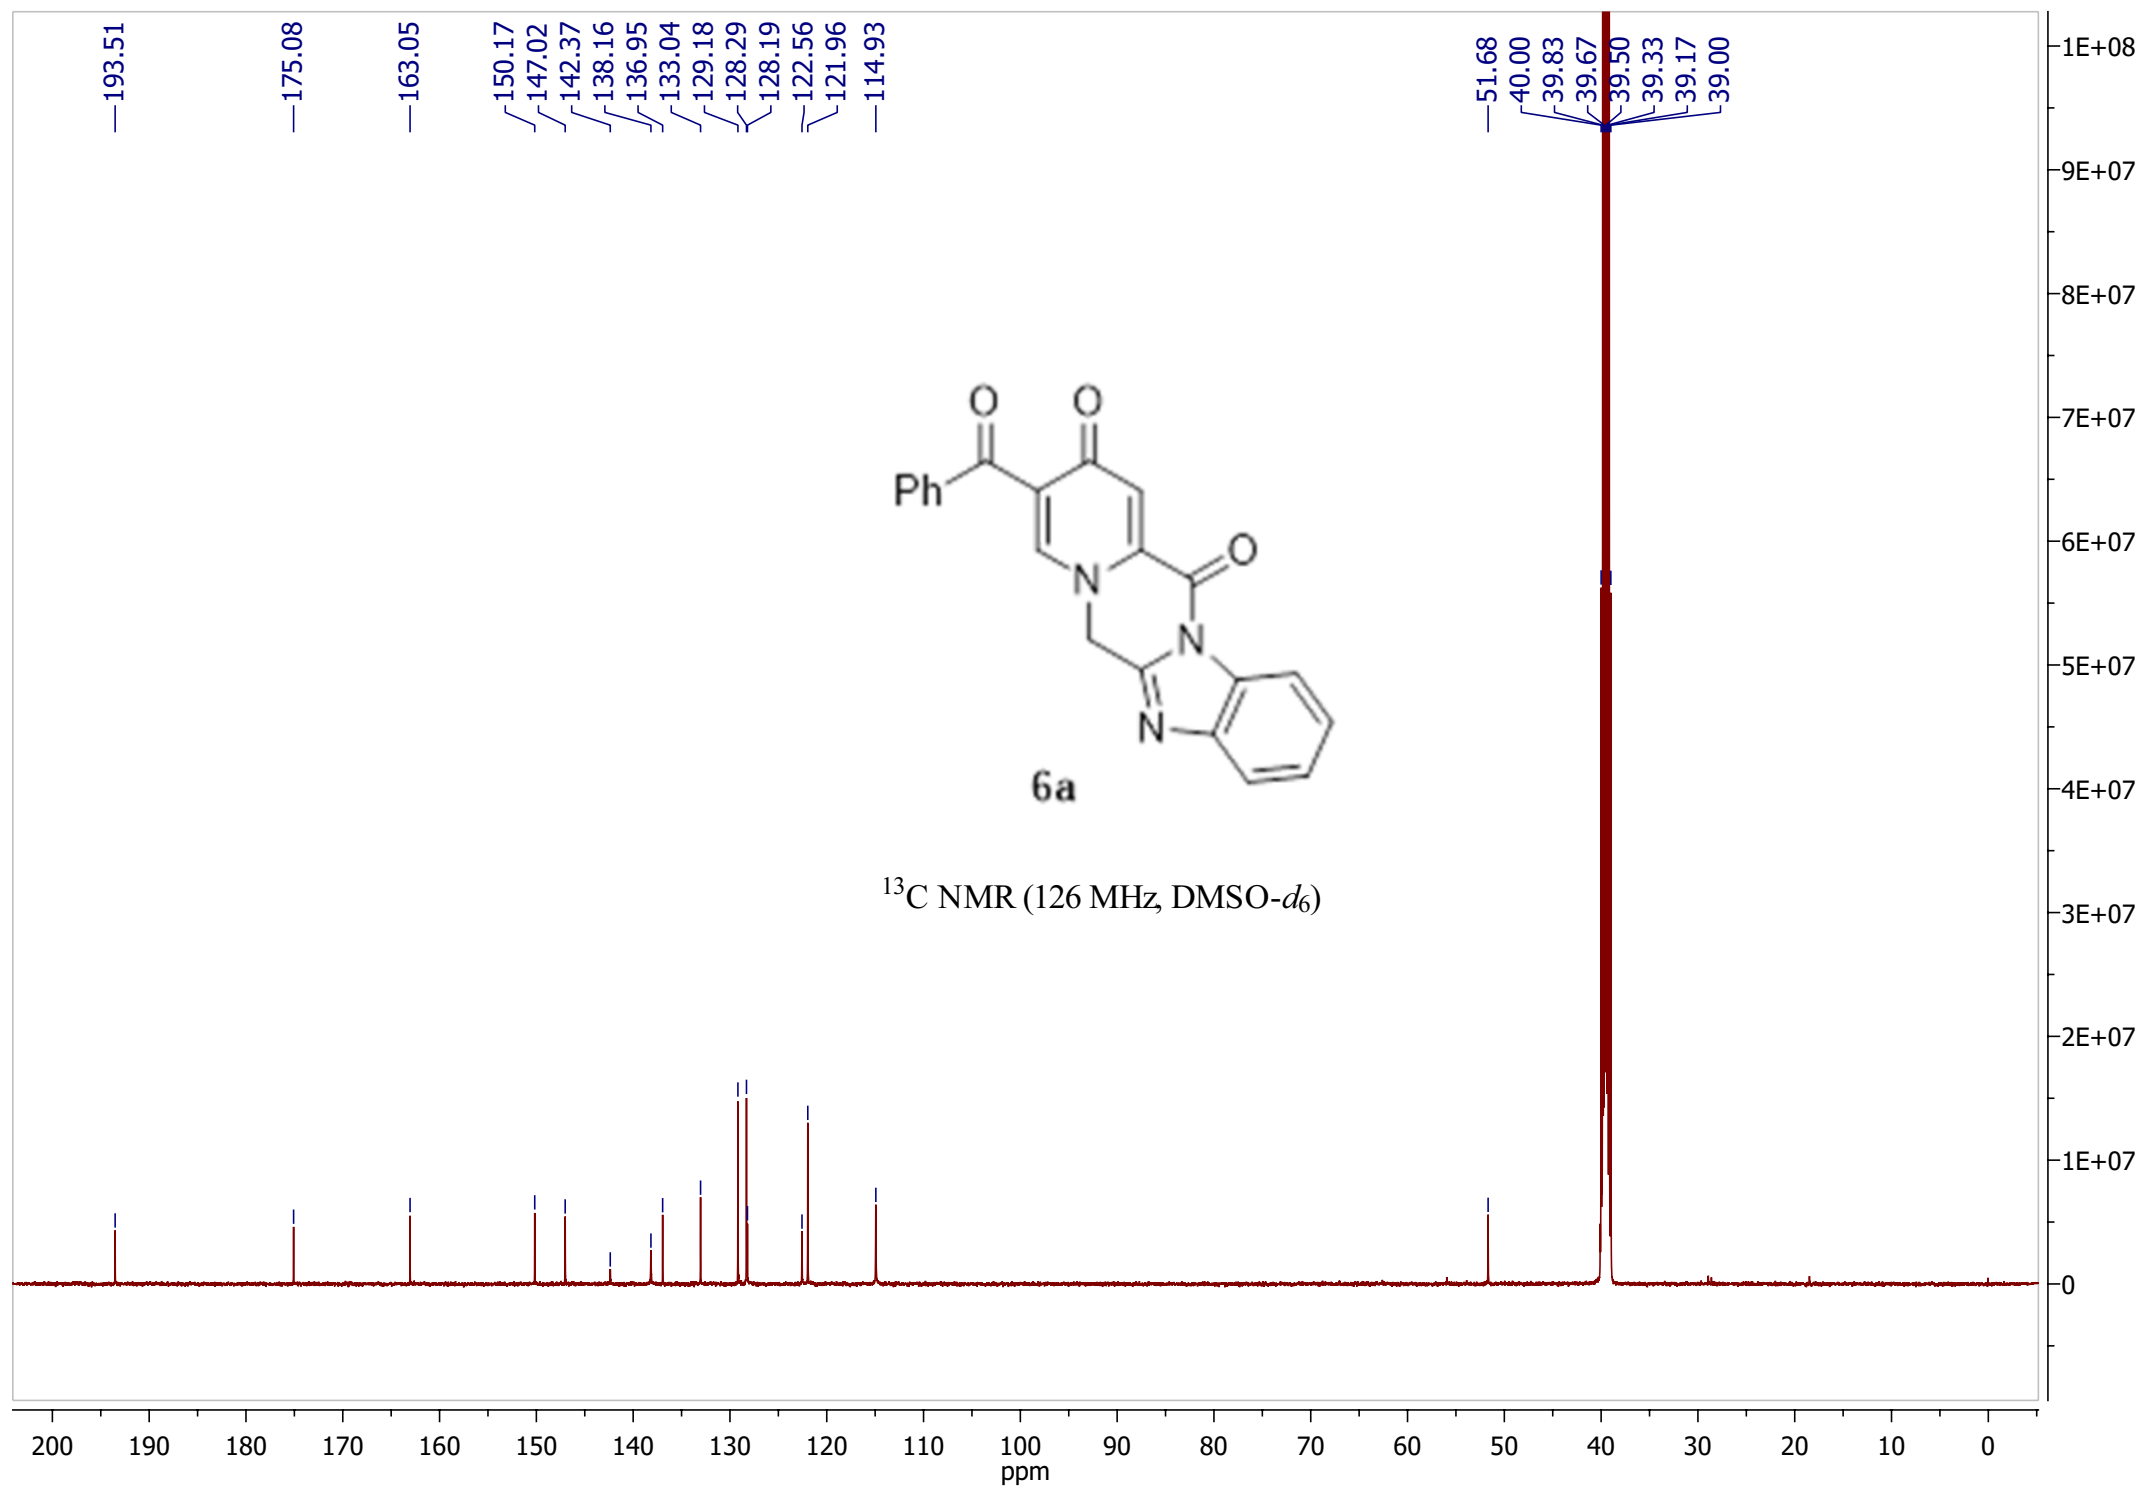

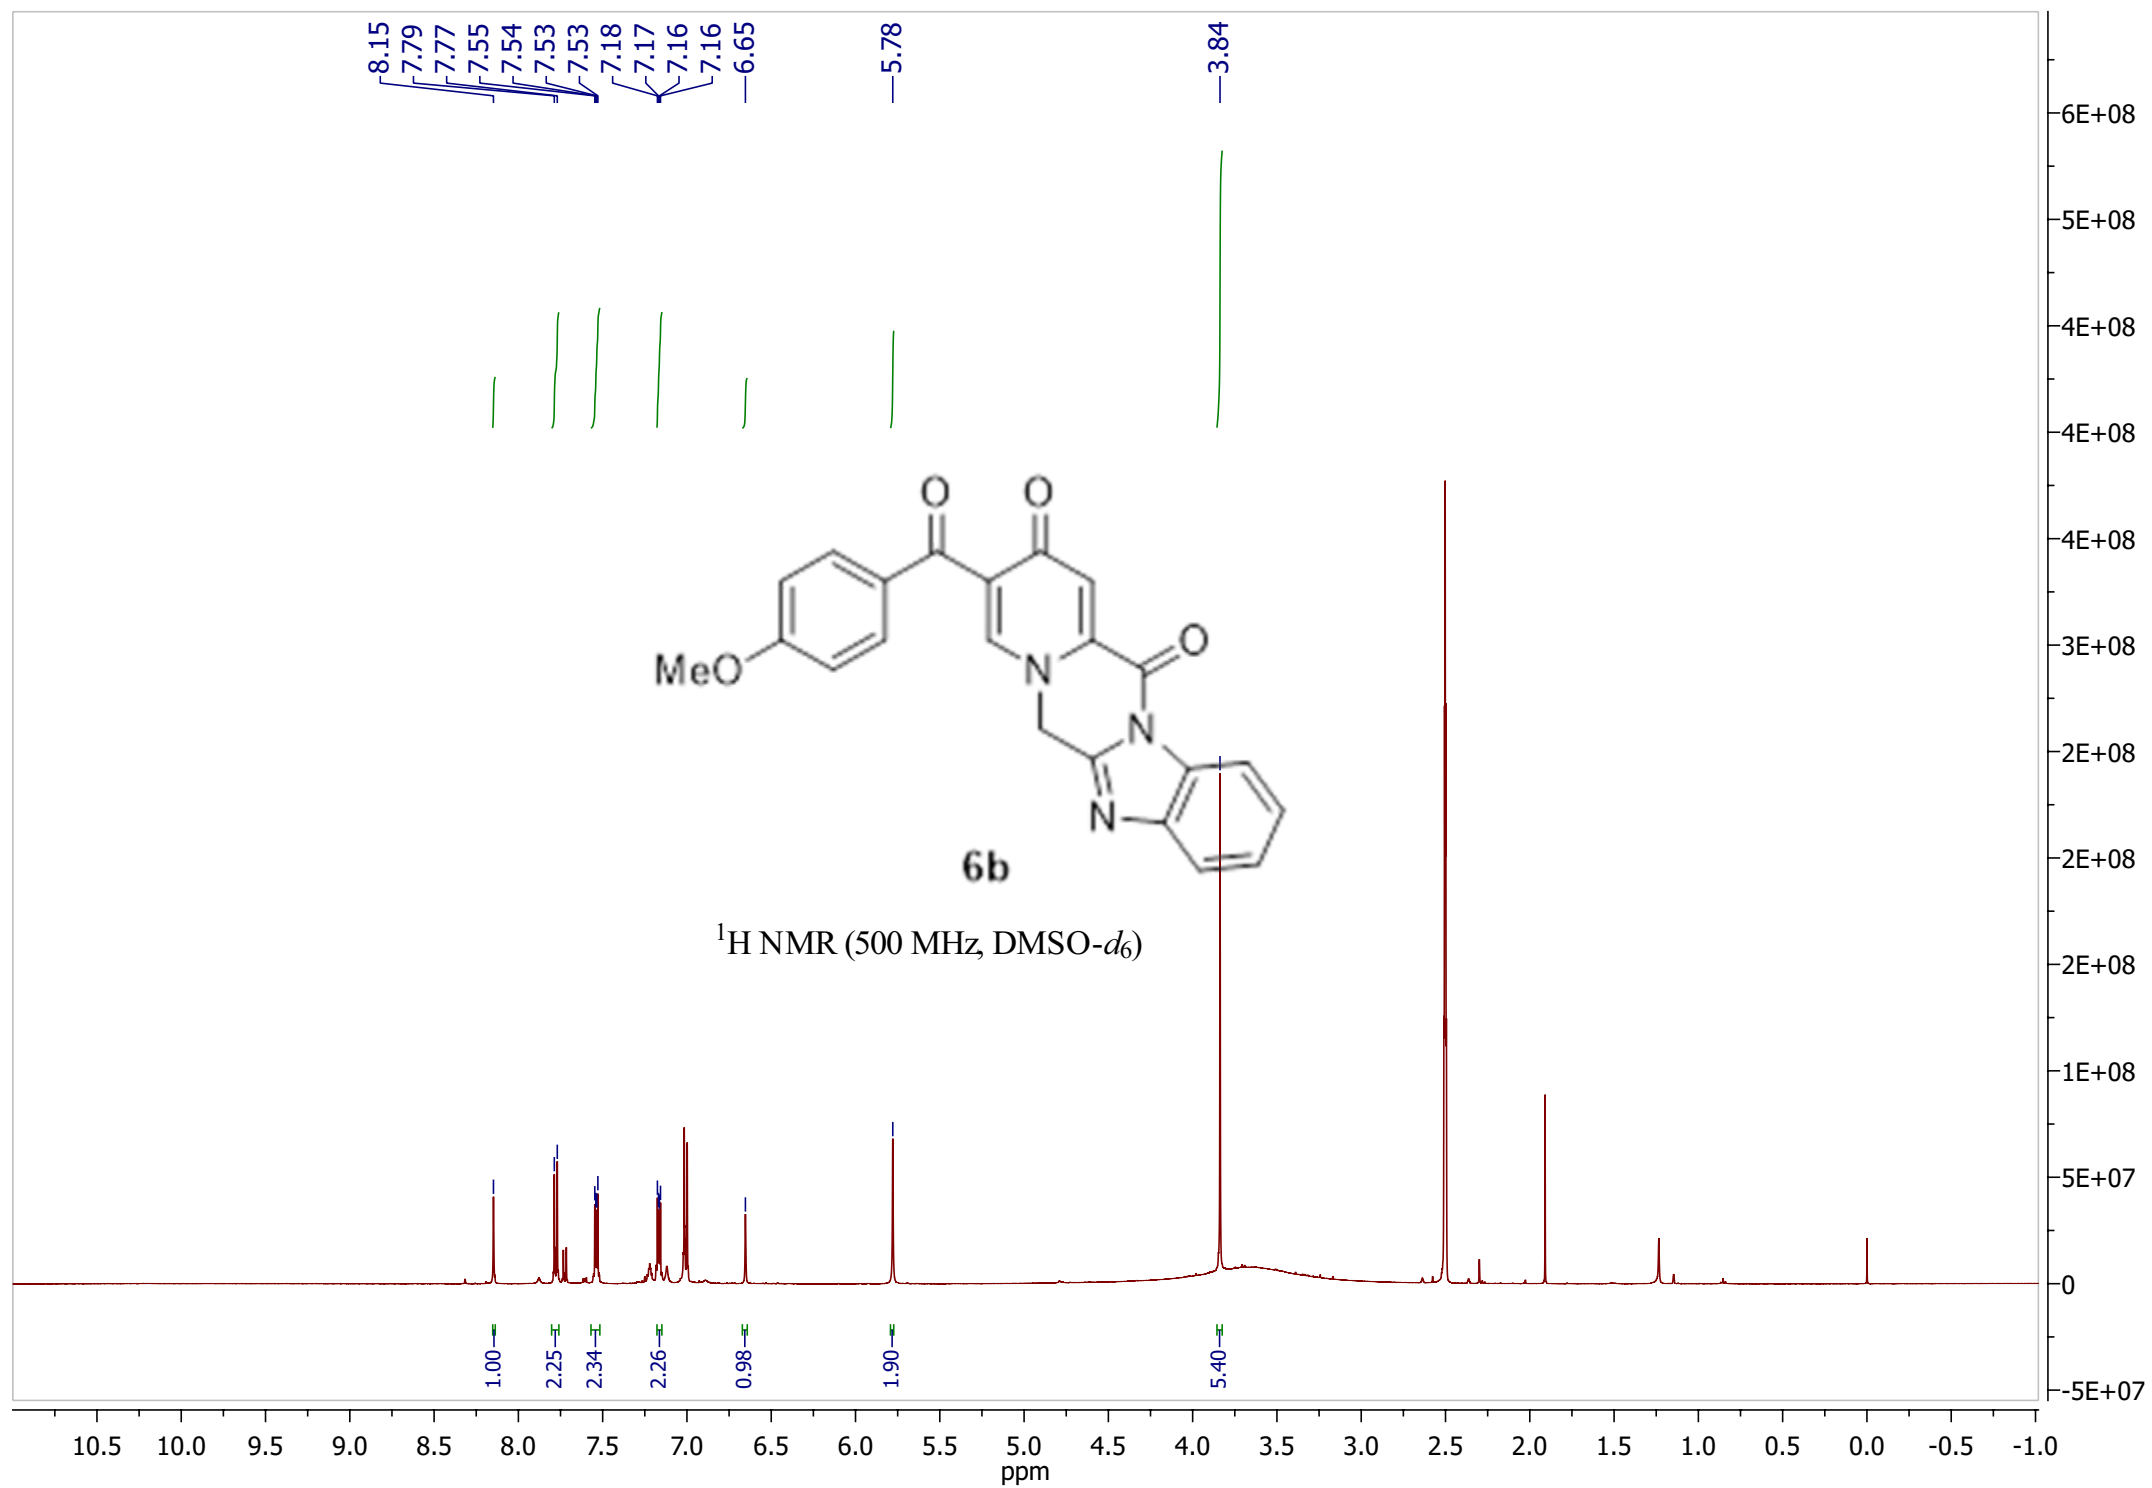

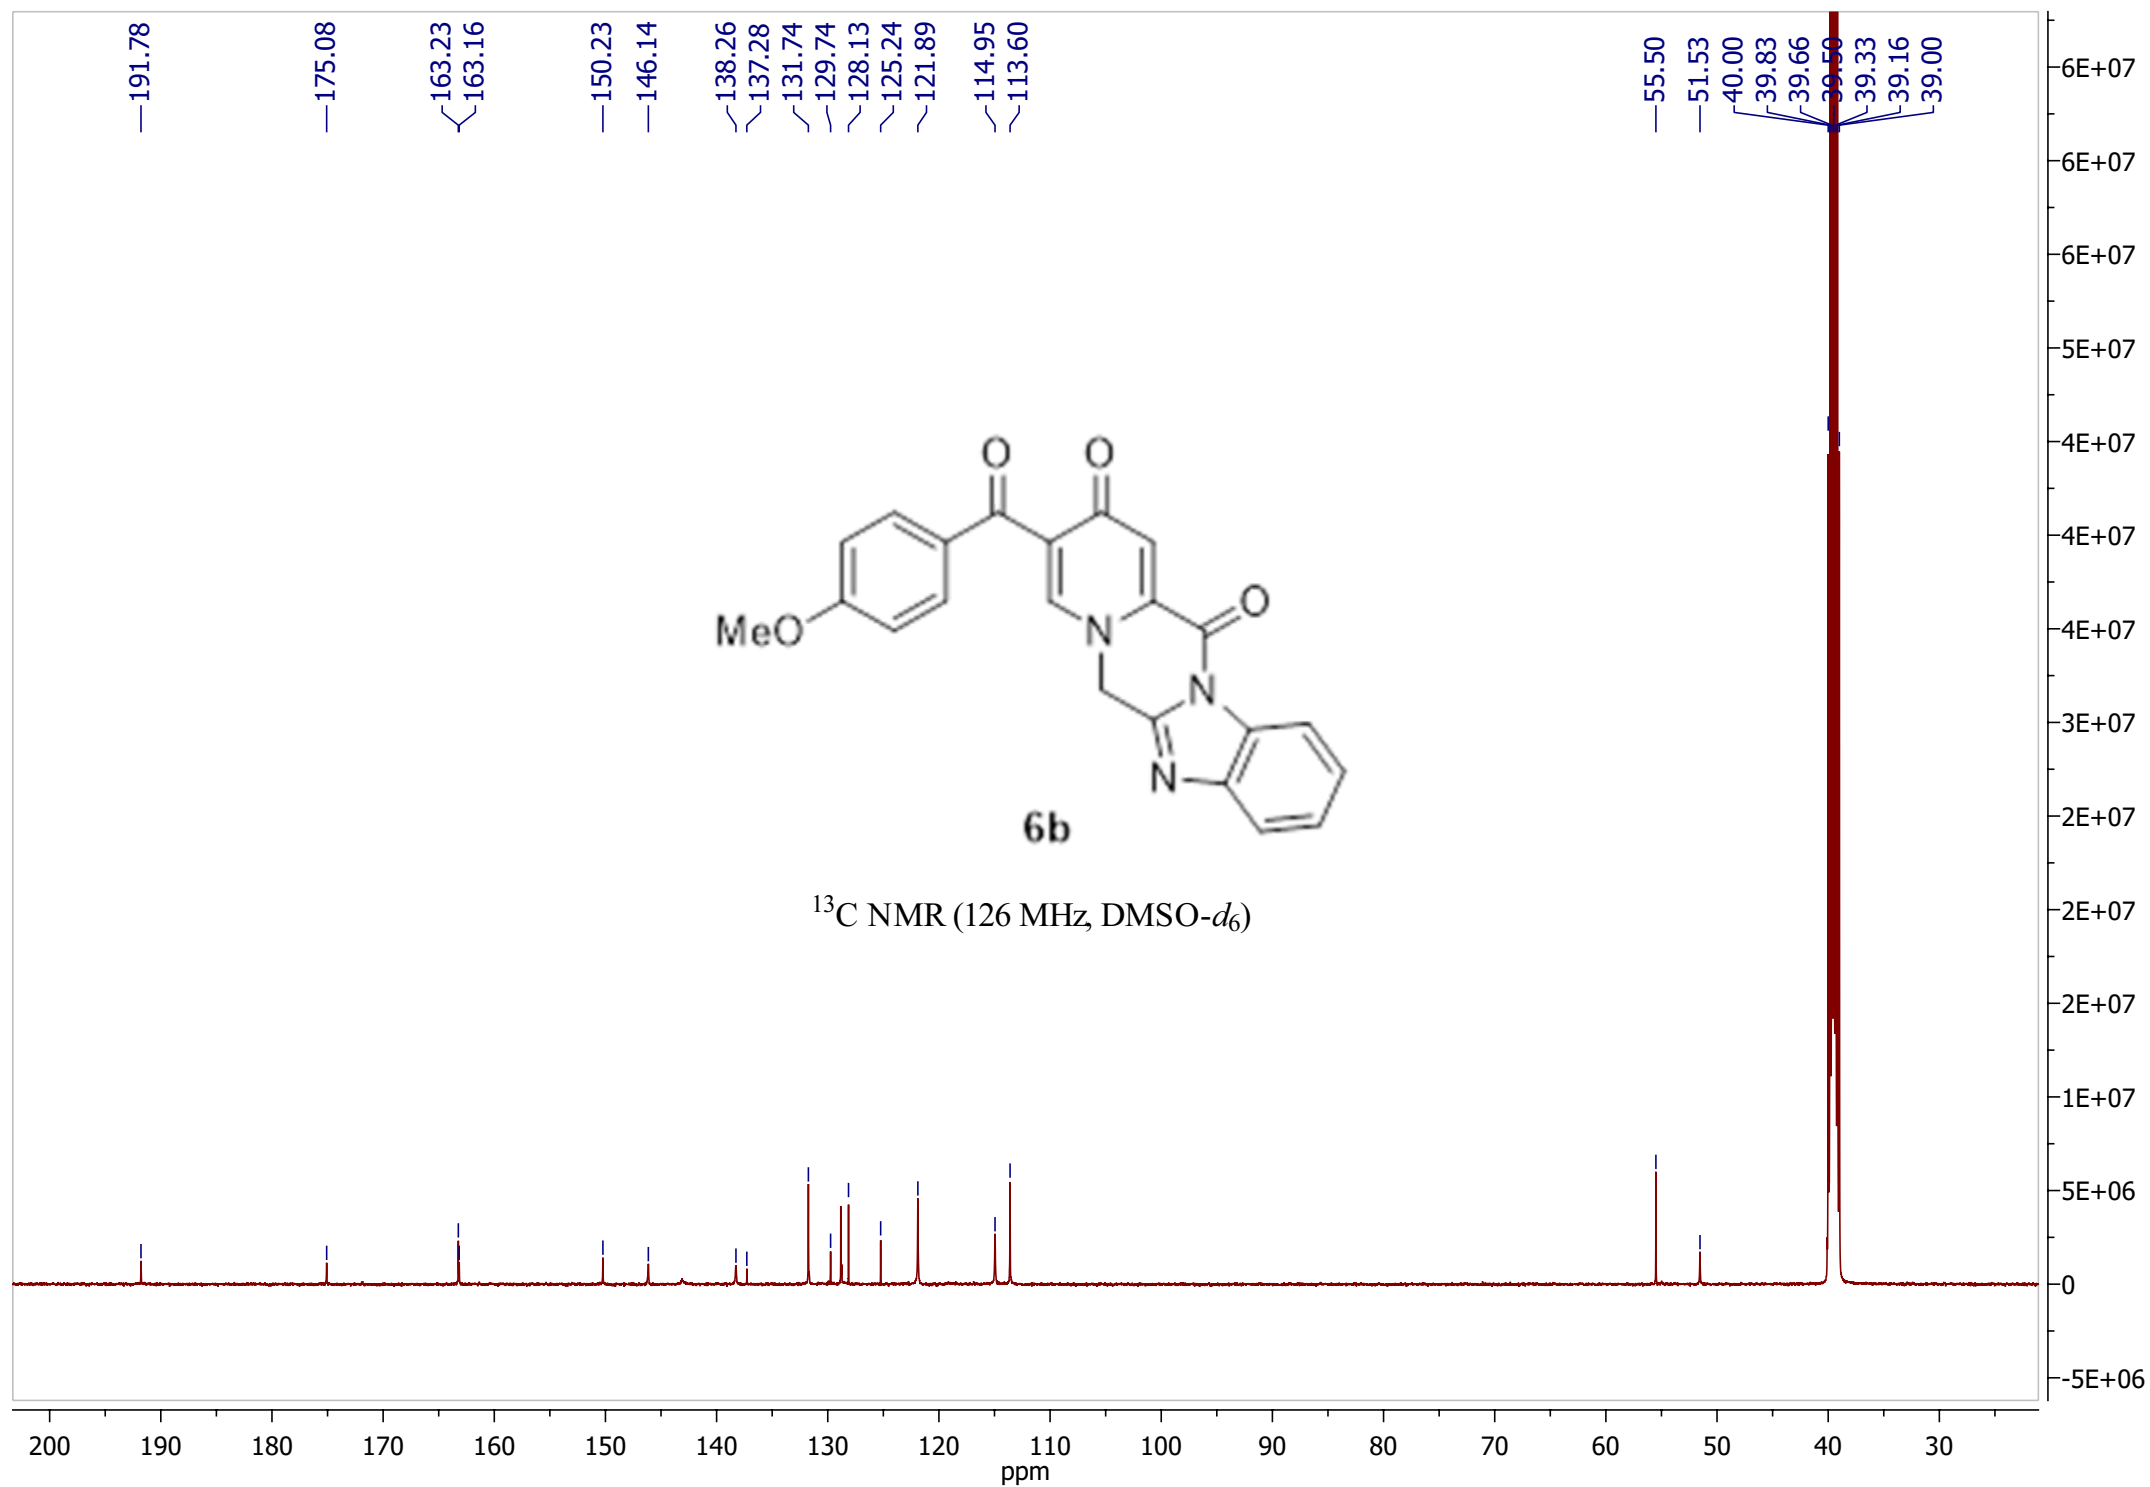

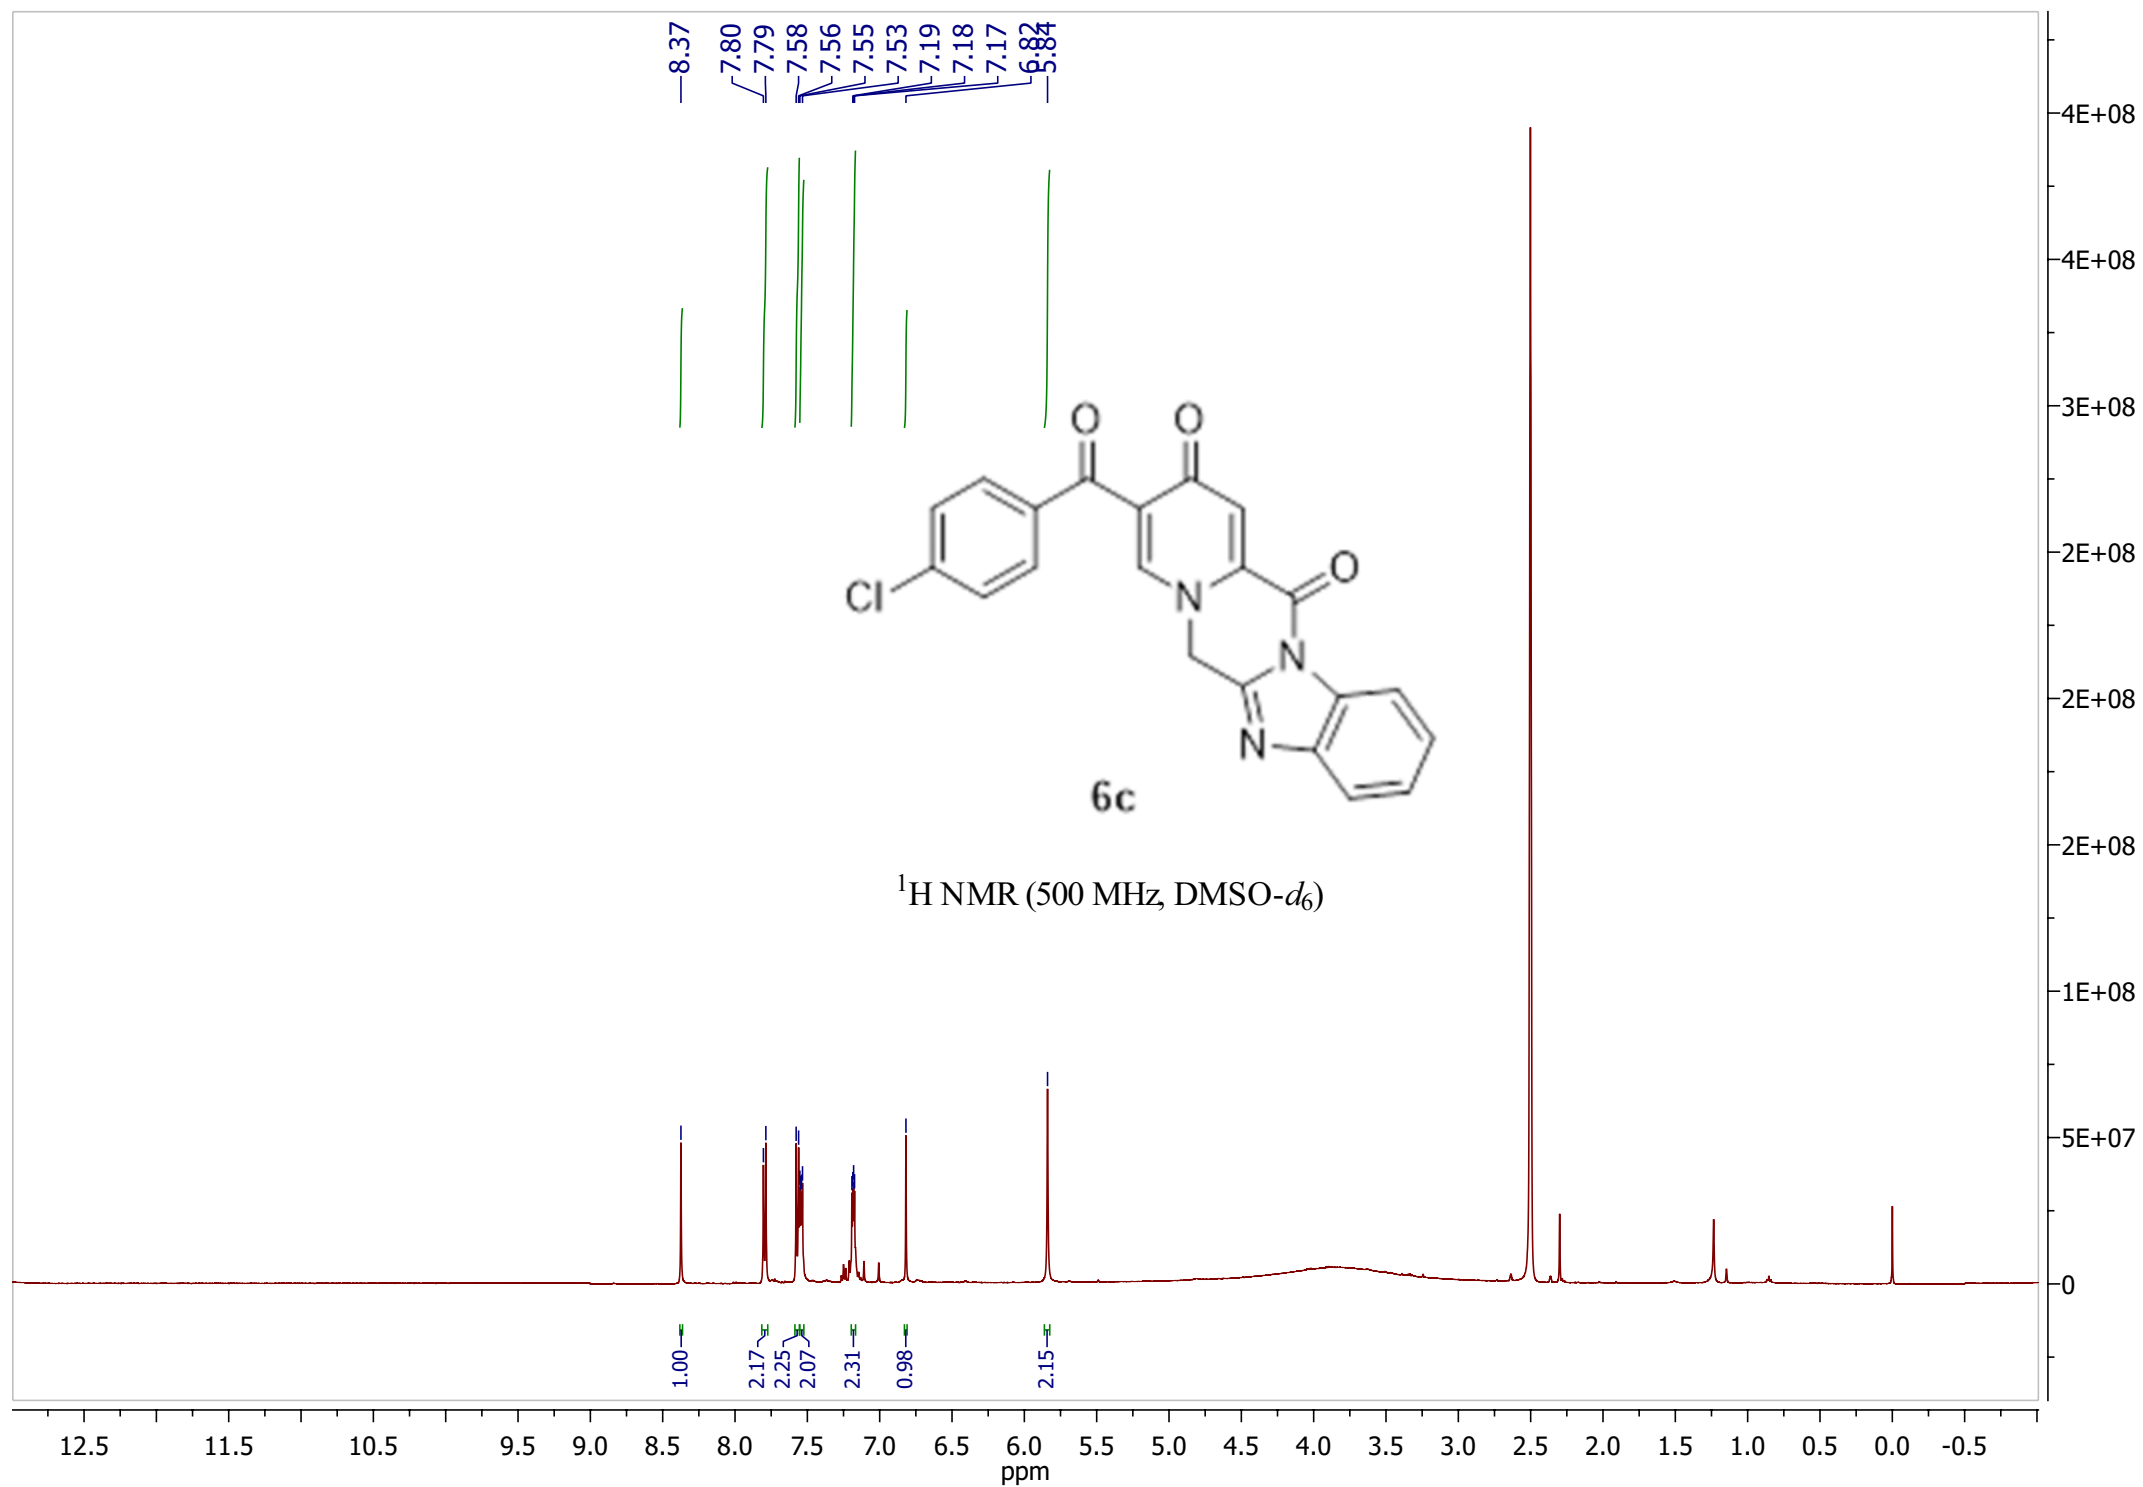

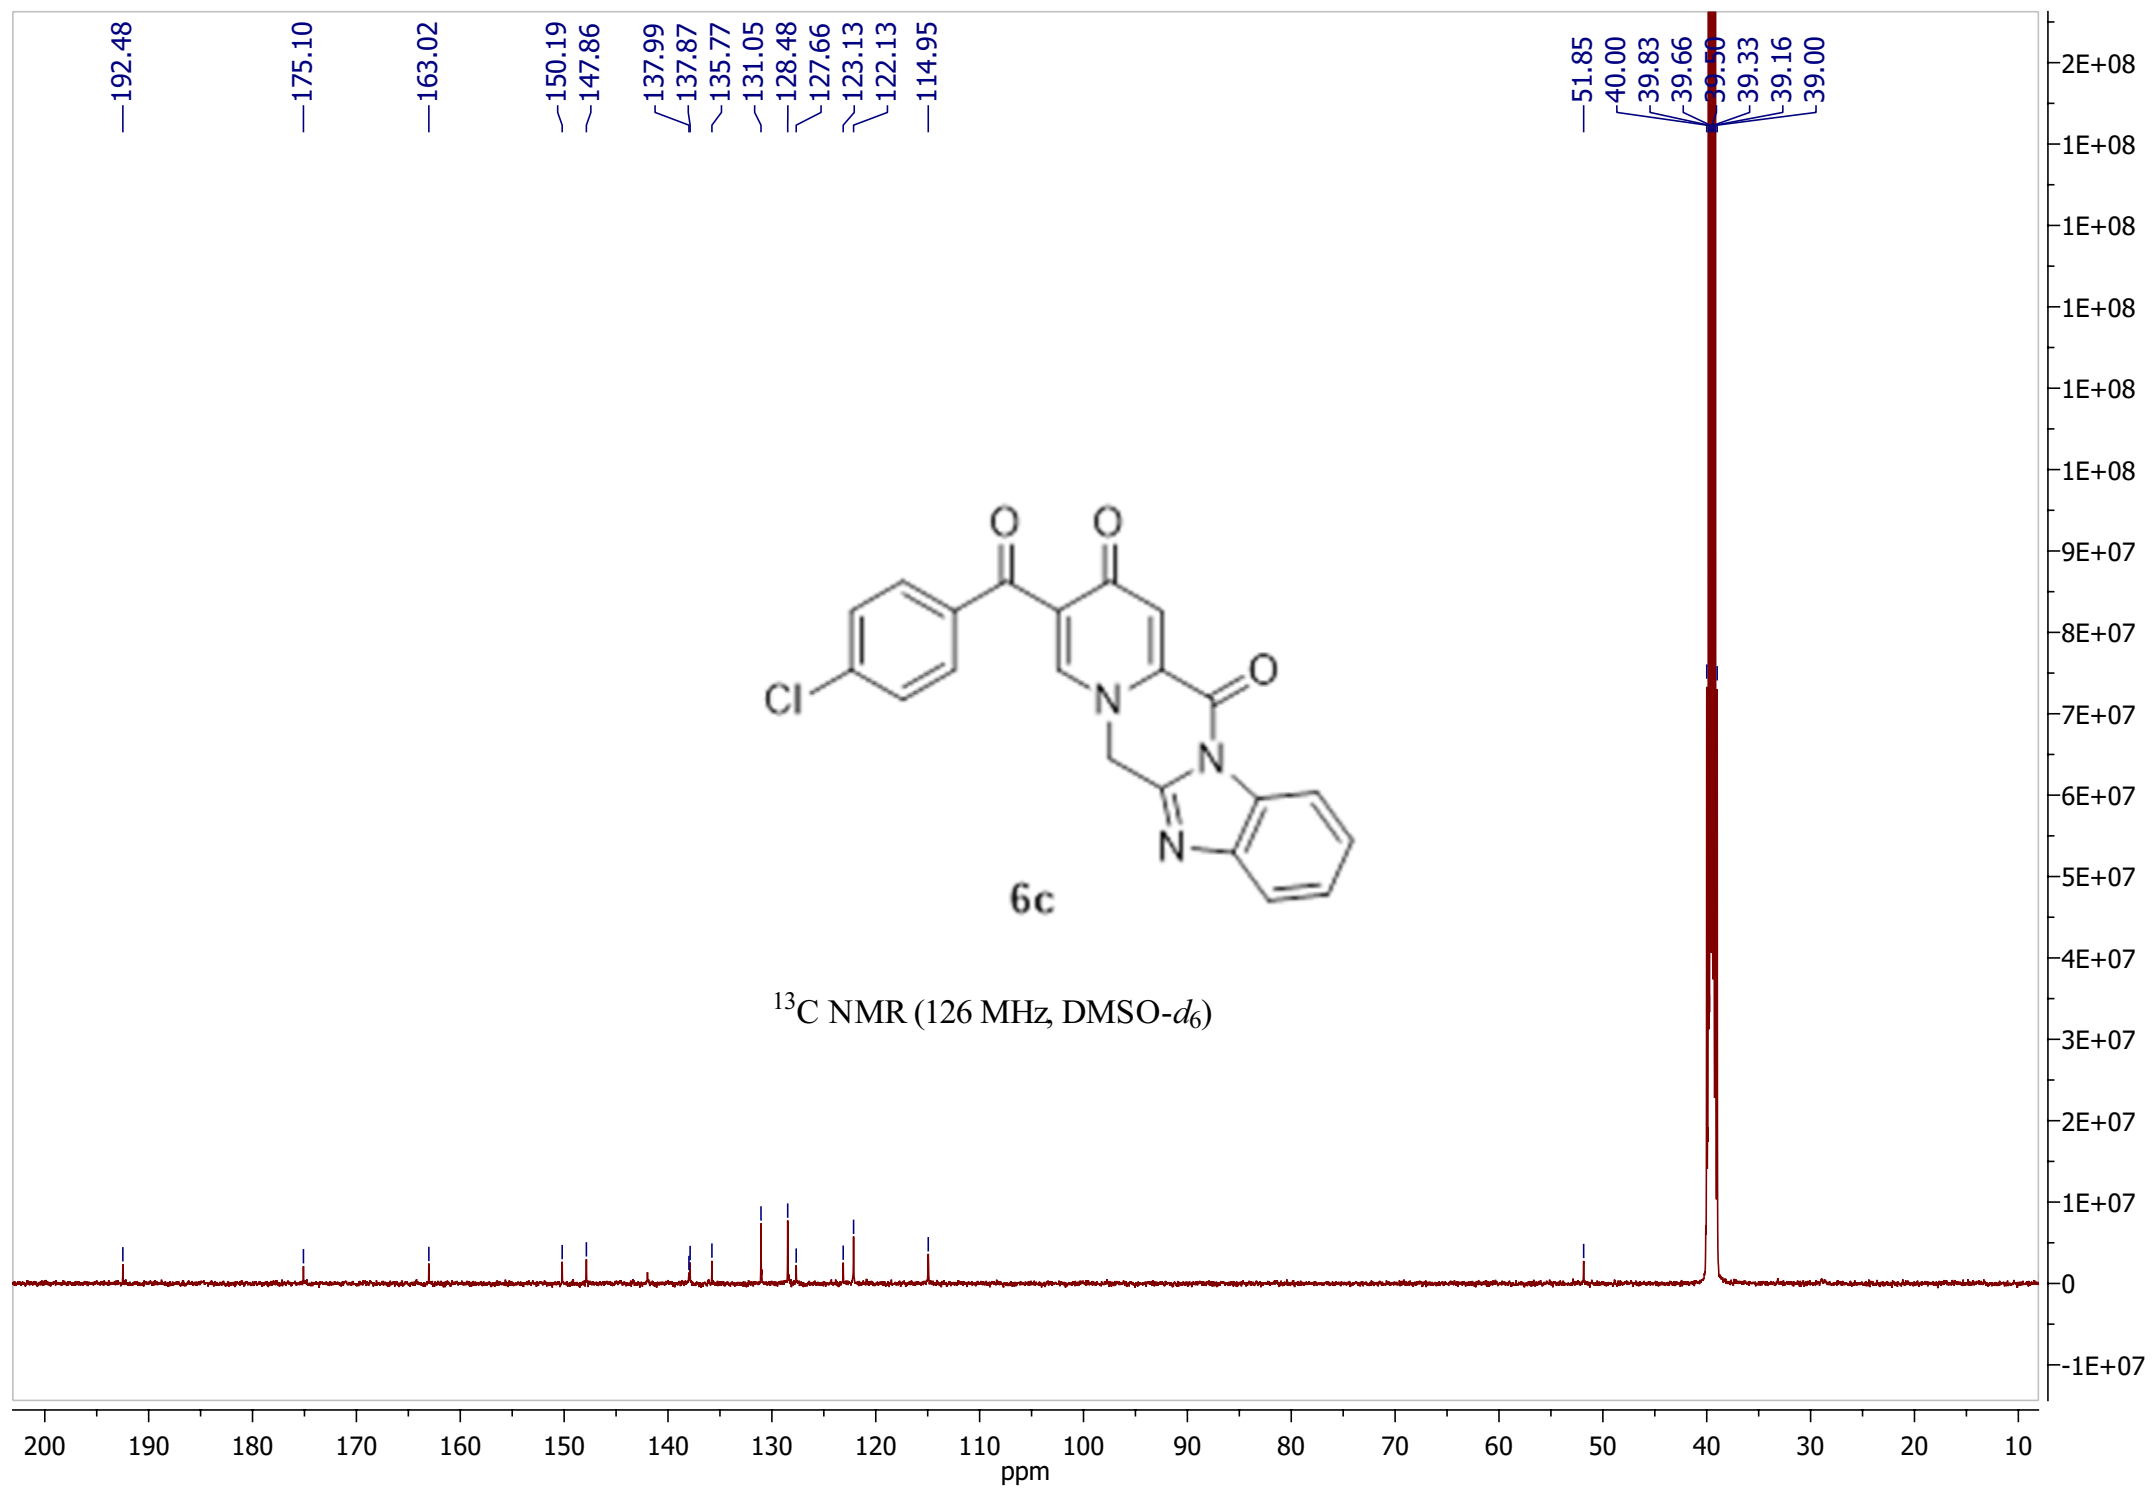



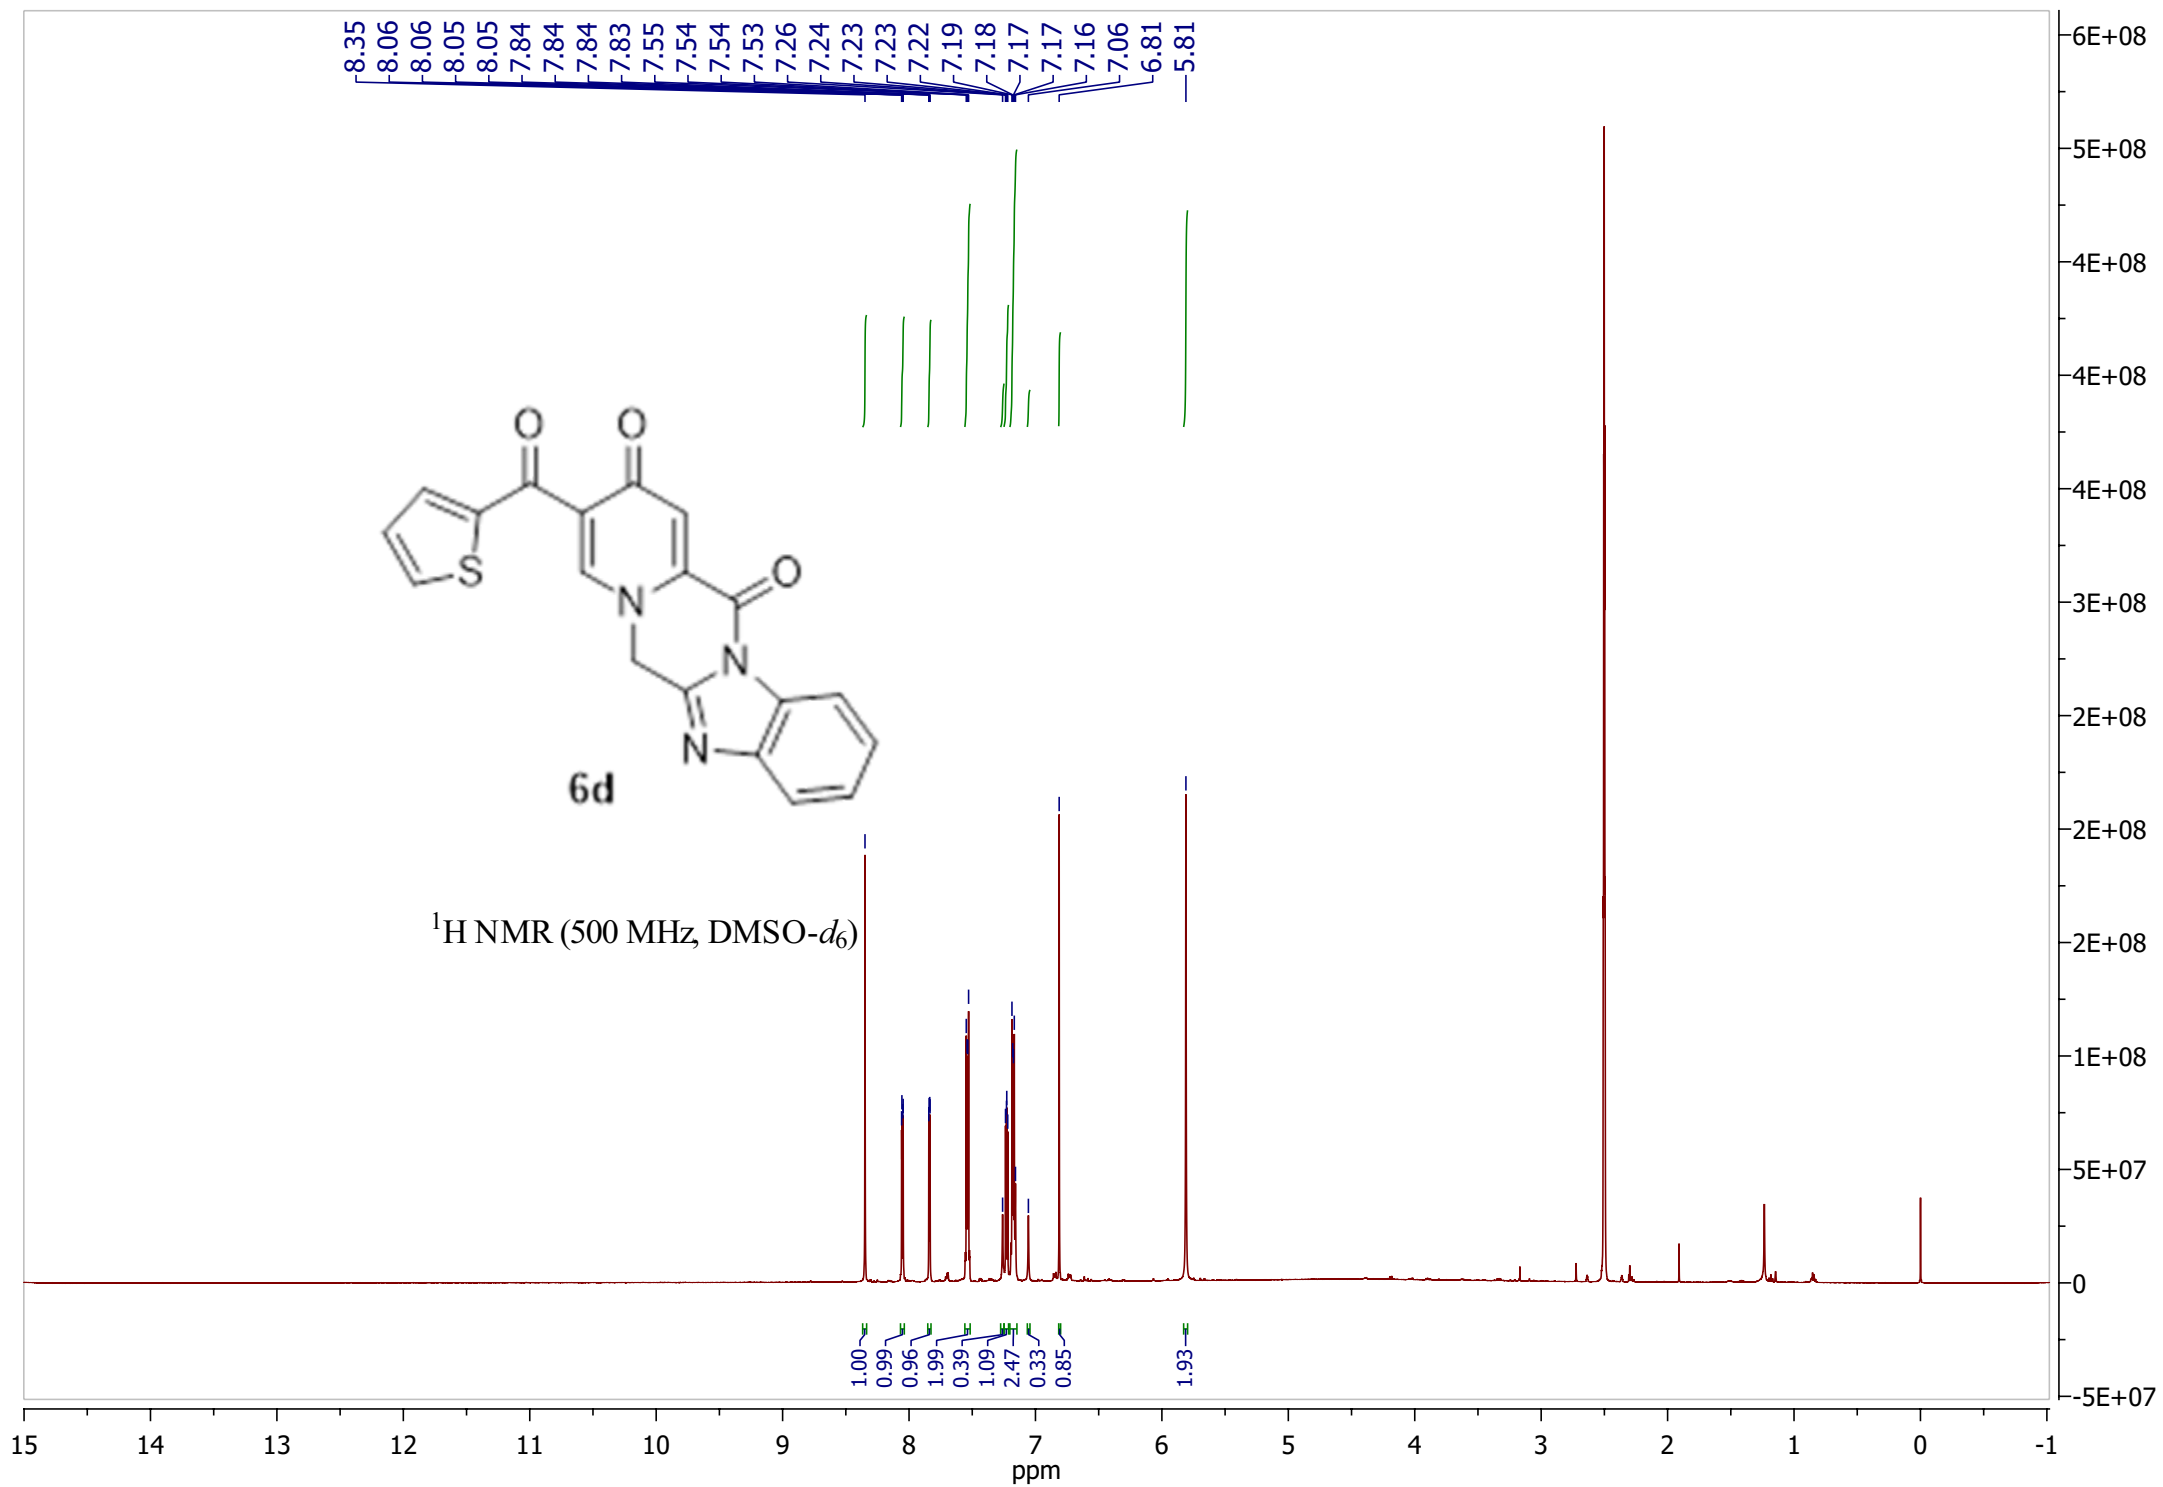

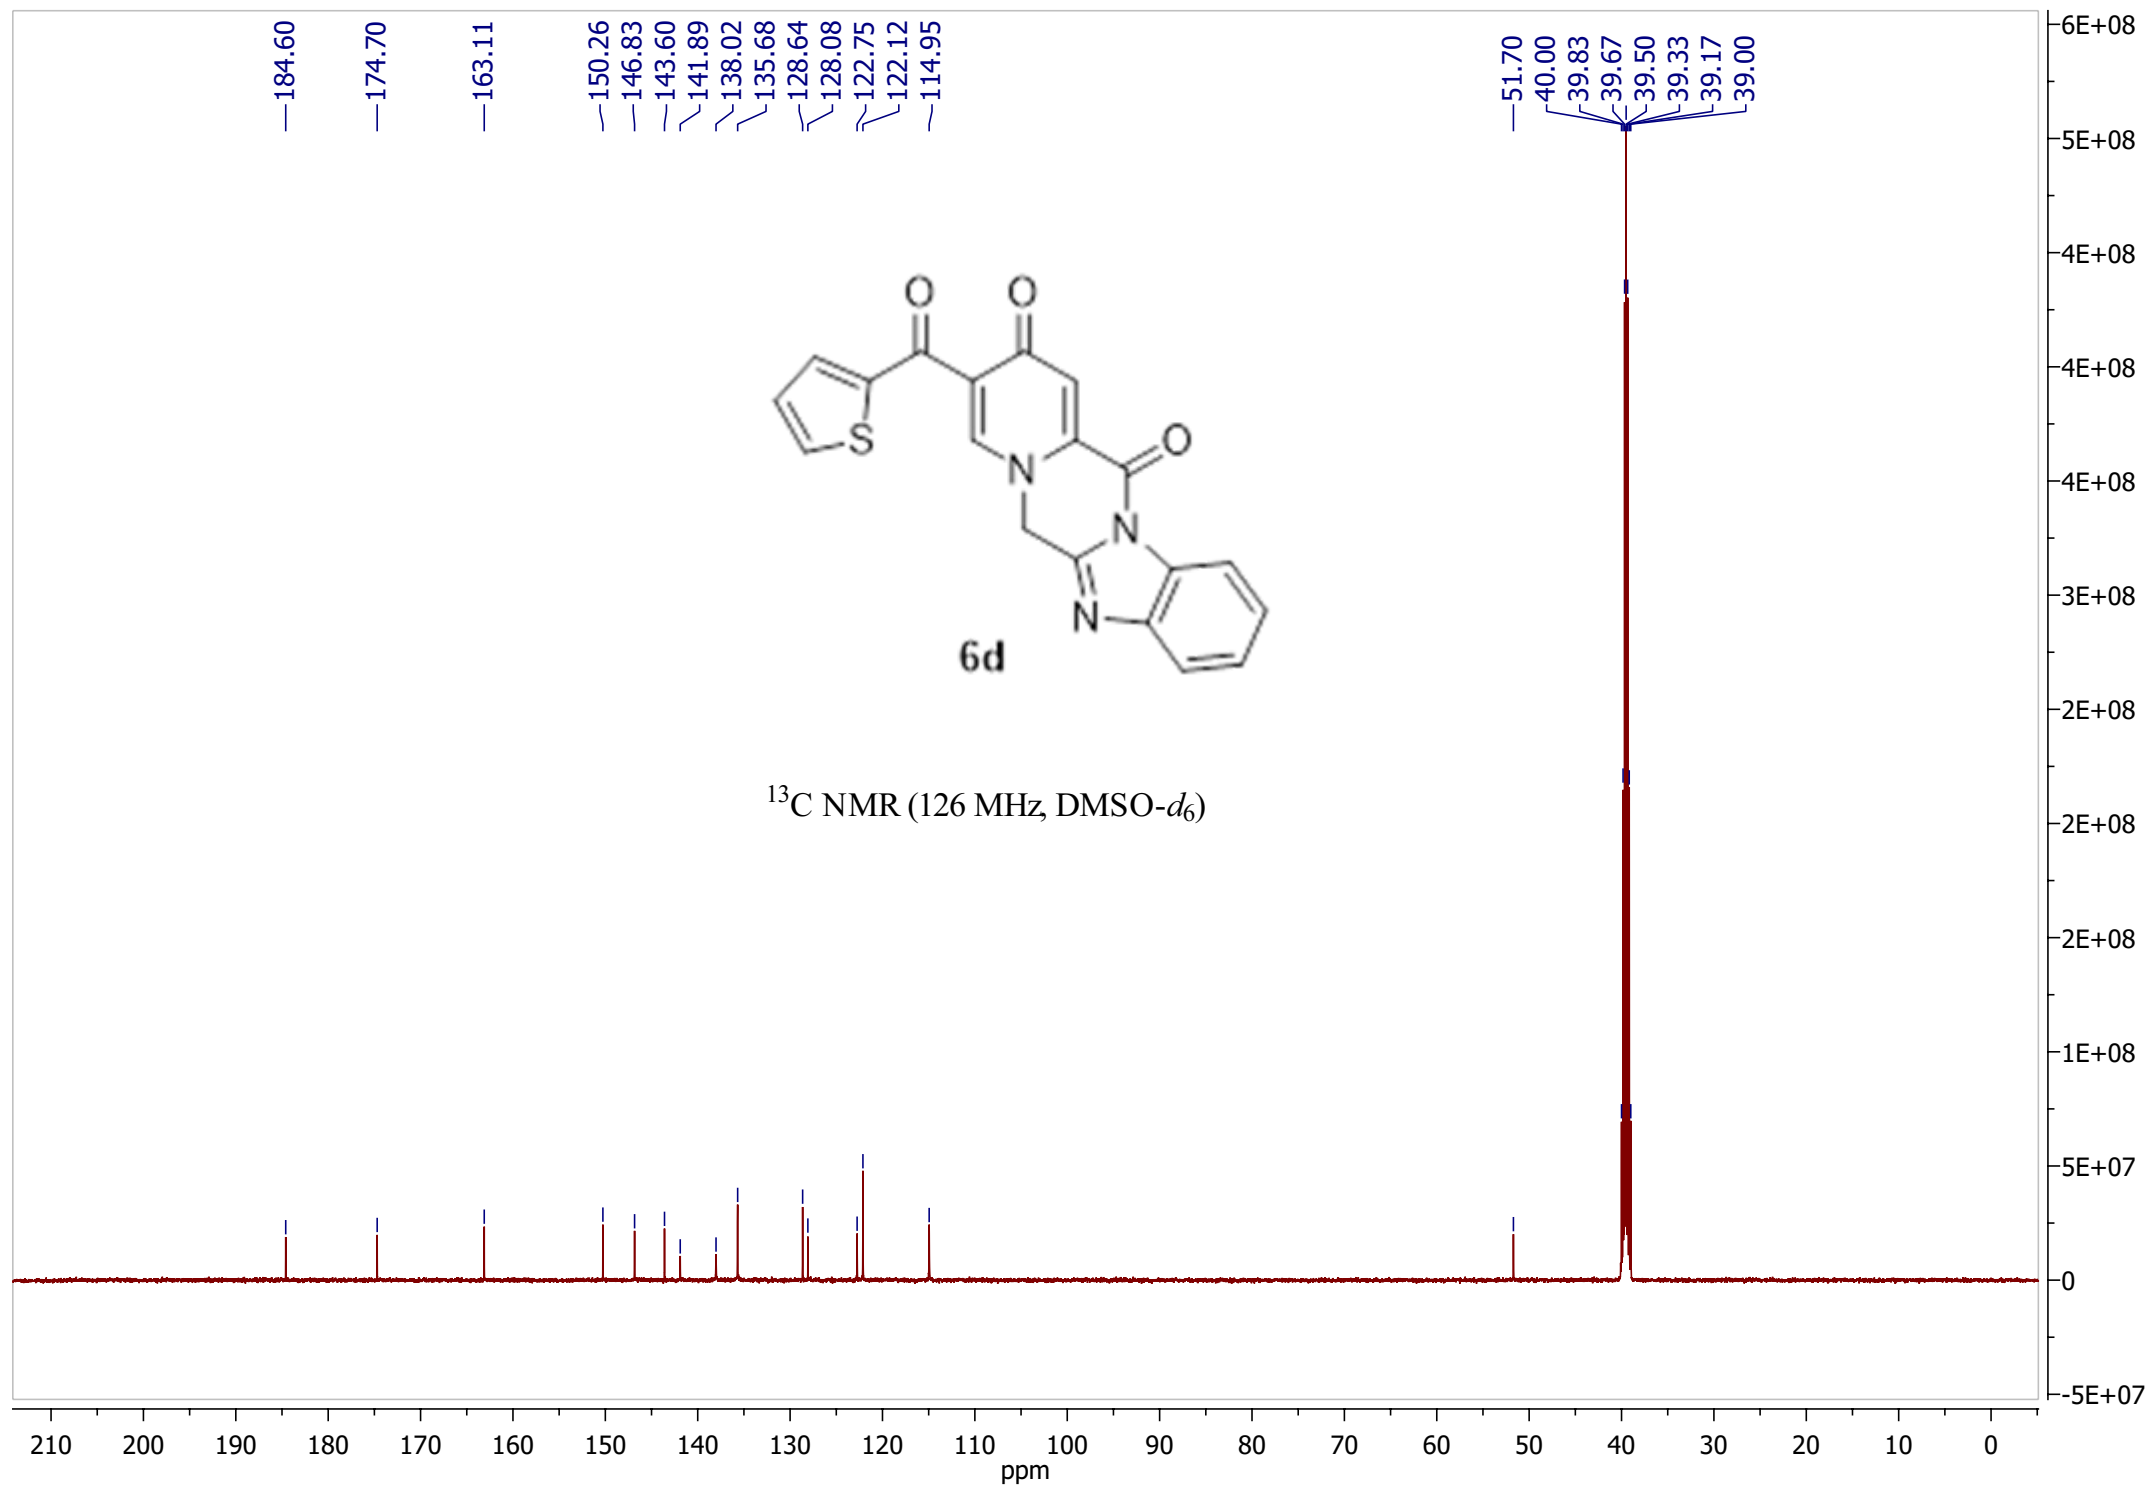

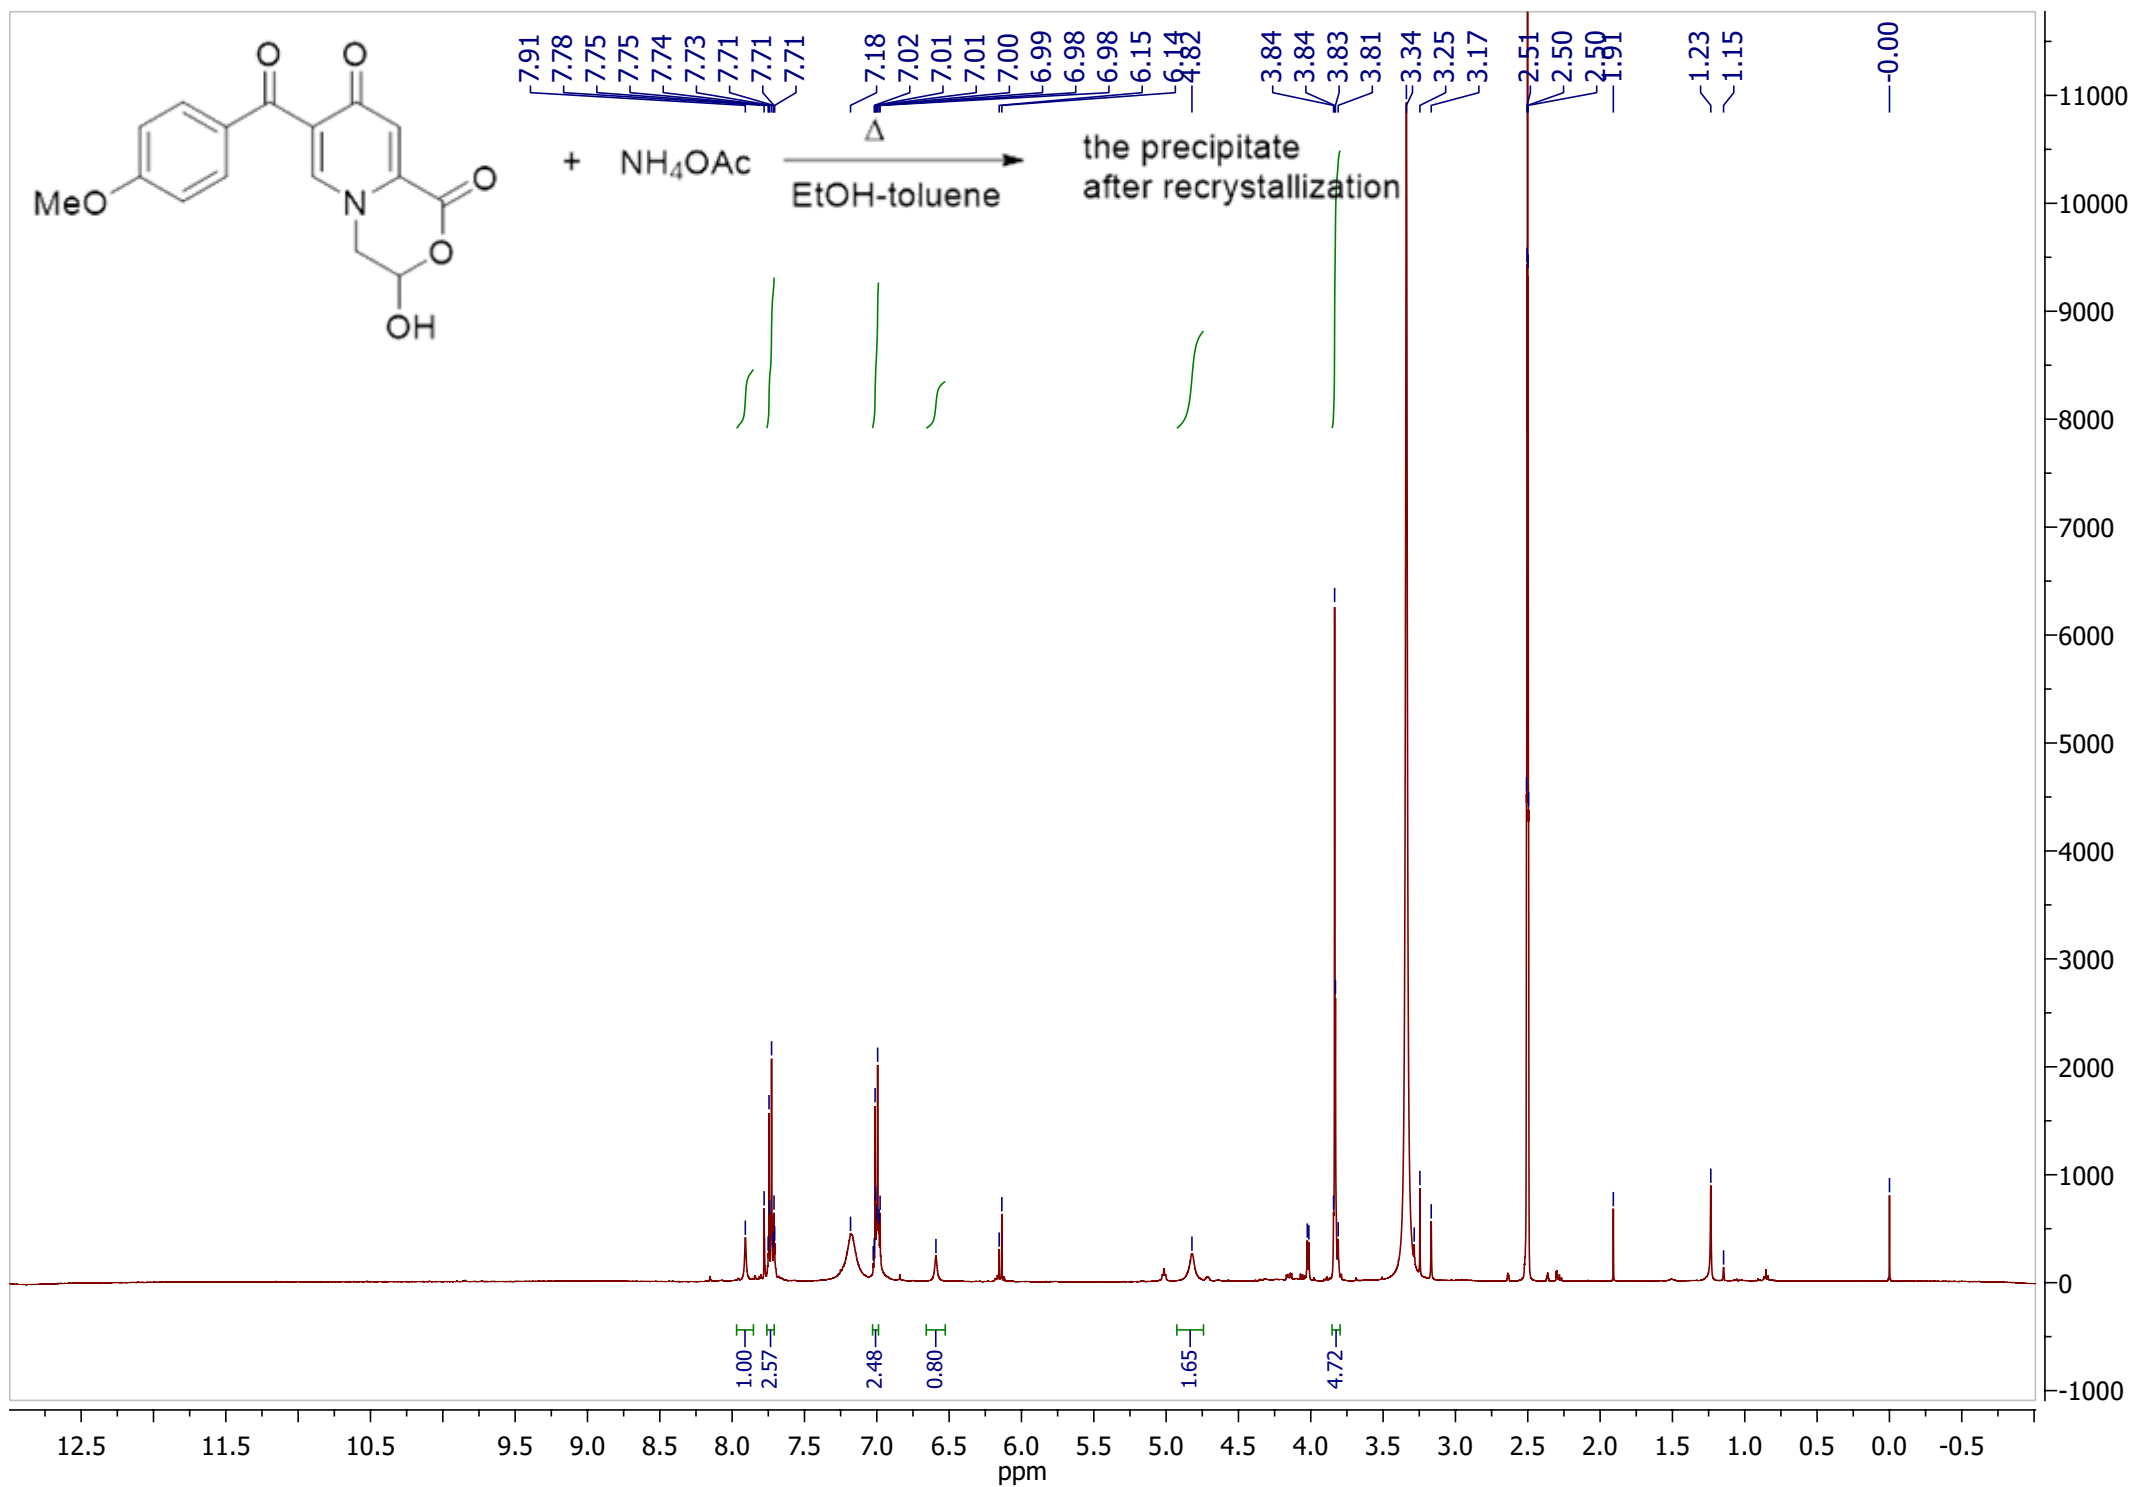

Single Mass Analysis

Tolerance = 5.0 PPM / DBE: min = -1.5, max = 50.0

Element prediction: Off

Number of isotope peaks used for i-FIT = 3

Monoisotopic Mass, Even Electron Ions

476 formula(e) evaluated with 2 results within limits (up to 50 closest results for each mass)

Elements Used:

C: 1-500 H: 1-1000 N: 1-10 O: 1-200

OD 25.10.2022

HRMS-CB-273 29 (0.136)

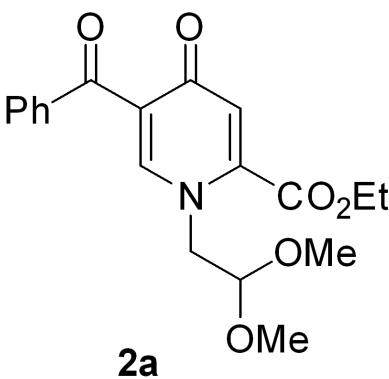

25-Oct-2022 12:42:53  
TOF MS ES+  
1.10e+004

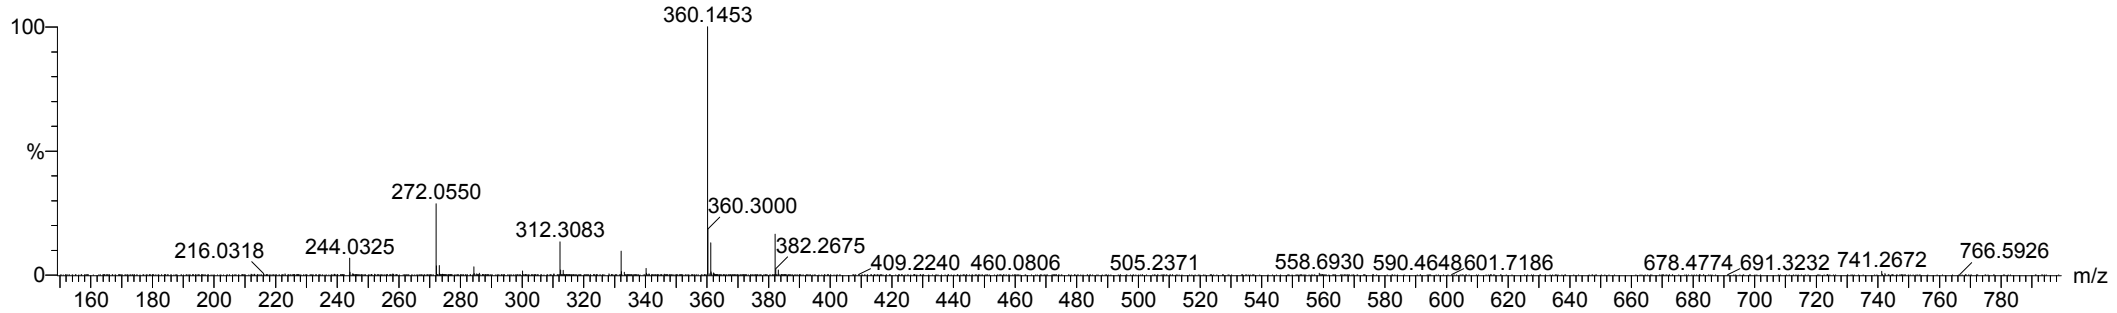

Minimum: -1.5  
Maximum: 5.0 5.0 50.0

| Mass     | Calc. Mass | mDa  | PPM  | DBE  | i-FIT | i-FIT (Norm) | Formula |     |    |    |
|----------|------------|------|------|------|-------|--------------|---------|-----|----|----|
| 360.1453 | 360.1447   | 0.6  | 1.7  | 9.5  | 94.1  | 0.6          | C19     | H22 | N  | O6 |
|          | 360.1461   | -0.8 | -2.2 | 14.5 | 94.2  | 0.7          | C20     | H18 | N5 | O2 |

Single Mass Analysis

Tolerance = 5.0 PPM / DBE: min = -1.5, max = 50.0

Element prediction: Off

Number of isotope peaks used for i-FIT = 3

Monoisotopic Mass, Even Electron Ions  
421 formula(e) evaluated with 2 results within limits (up to 50 closest results for each mass)

Elements Used:  
C: 1-500 H: 1-1000 N: 1-10 O: 1-200

OD 25.10.2022  
HRMS-CB-274 29 (0.136)

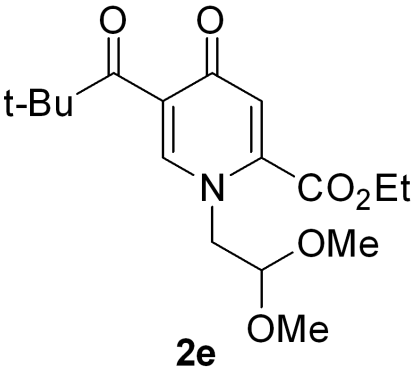

25-Oct-2022 12:47:40  
TOF MS ES+  
1.17e+004

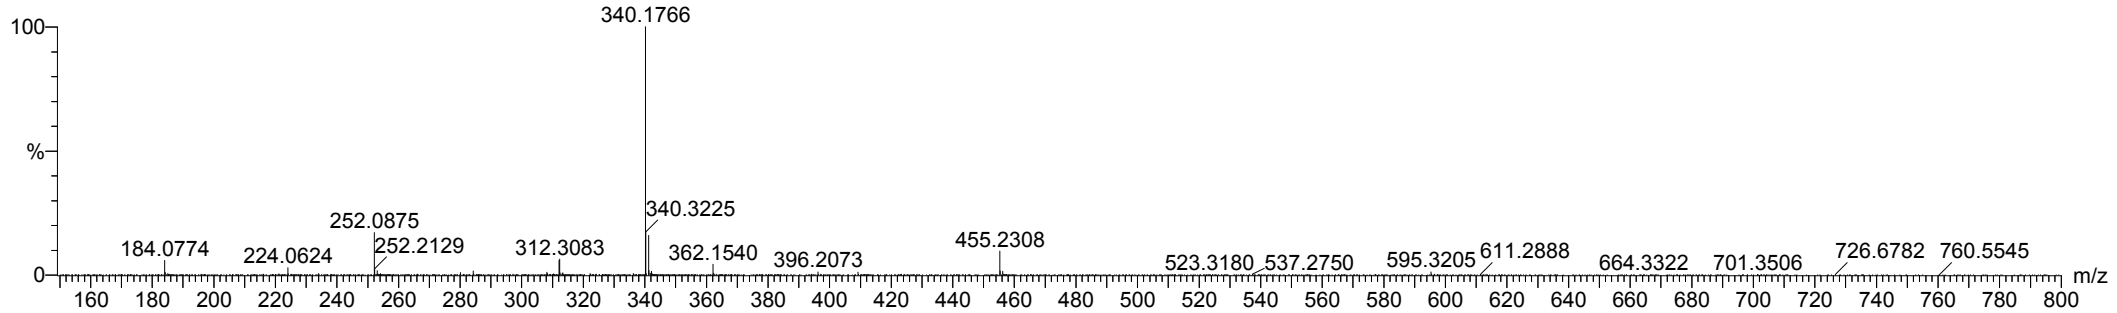

|          |            |      |      |      |       |              |         |           |
|----------|------------|------|------|------|-------|--------------|---------|-----------|
| Minimum: |            |      |      | -1.5 |       |              |         |           |
| Maximum: |            | 5.0  | 5.0  | 50.0 |       |              |         |           |
| Mass     | Calc. Mass | mDa  | PPM  | DBE  | i-FIT | i-FIT (Norm) | Formula |           |
| 340.1766 | 340.1760   | 0.6  | 1.8  | 5.5  | 92.5  | 0.5          | C17     | H26 N O6  |
|          | 340.1774   | -0.8 | -2.4 | 10.5 | 92.8  | 0.9          | C18     | H22 N5 O2 |

## Single Mass Analysis

Tolerance = 5.0 PPM / DBE: min = -1.5, max = 50.0

Element prediction: Off

Number of isotope peaks used for i-FIT = 3

Monoisotopic Mass, Even Electron Ions

297 formula(e) evaluated with 1 results within limits (up to 50 closest results for each mass)

Elements Used:

C: 1-500 H: 1-1000 N: 1-10 O: 1-200

OD 28.07.2022

HRMS-CB-262 39 (0.177)

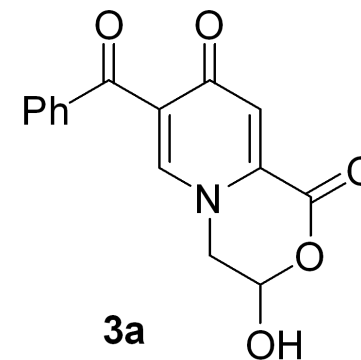28-Jul-2022 11:55:27  
TOF MS ES+  
2.90e+002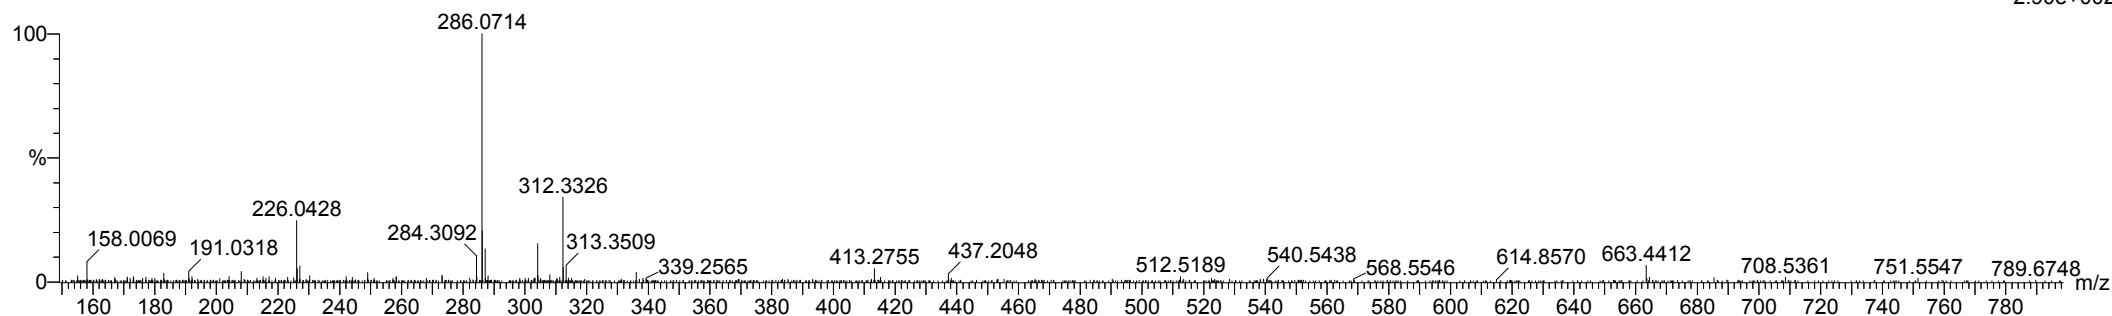

Minimum: -1.5  
Maximum: 5.0 5.0 50.0

| Mass     | Calc. Mass | mDa  | PPM  | DBE  | i-FIT | i-FIT (Norm) | Formula      |
|----------|------------|------|------|------|-------|--------------|--------------|
| 286.0714 | 286.0715   | -0.1 | -0.3 | 10.5 | 32.4  | 0.0          | C15 H12 N O5 |

## Single Mass Analysis

Tolerance = 5.0 PPM / DBE: min = -1.5, max = 50.0

Element prediction: Off

Number of isotope peaks used for i-FIT = 3

Monoisotopic Mass, Even Electron Ions

296 formula(e) evaluated with 2 results within limits (up to 50 closest results for each mass)

Elements Used:

C: 1-500 H: 1-1000 N: 1-10 O: 1-200 Cl: 1-1

OD 25.10.2022

HRMS-CB-282 24 (0.115)

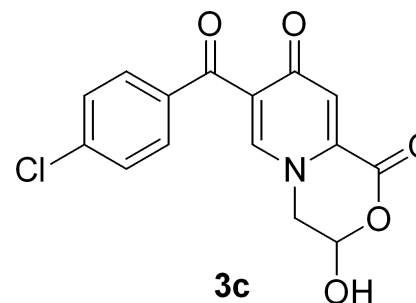25-Oct-2022 13:08:07  
TOF MS ES+  
4.59e+003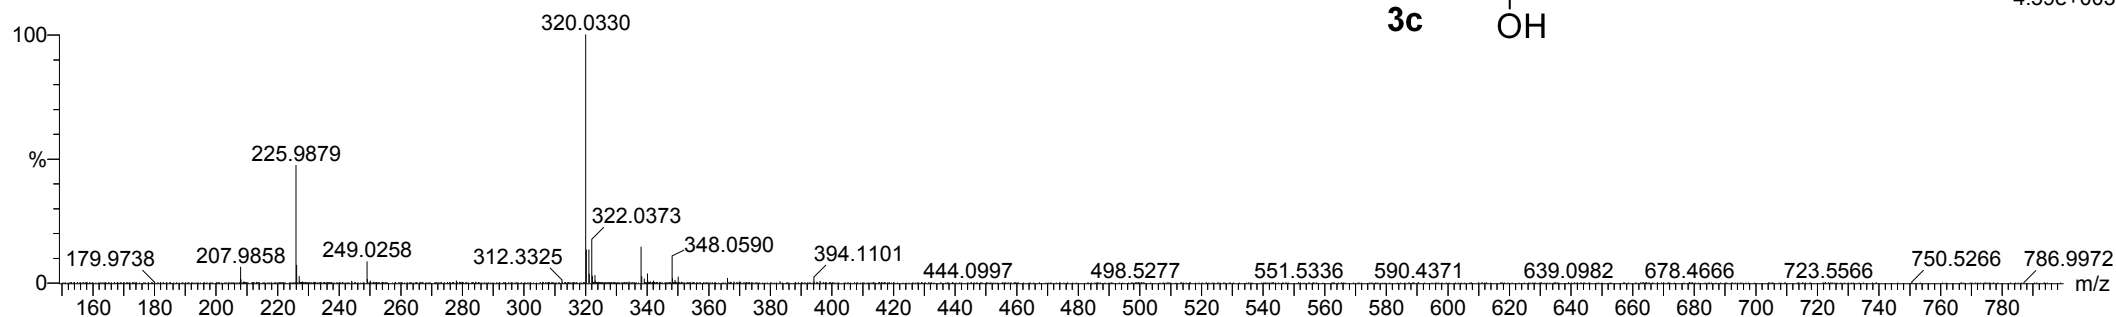

Minimum: -1.5  
Maximum: 5.0 5.0 50.0

| Mass     | Calc. Mass | mDa  | PPM  | DBE  | i-FIT | i-FIT (Norm) | Formula         |
|----------|------------|------|------|------|-------|--------------|-----------------|
| 320.0330 | 320.0326   | 0.4  | 1.2  | 10.5 | 67.1  | 0.7          | C15 H11 N O5 Cl |
|          | 320.0339   | -0.9 | -2.8 | 15.5 | 67.0  | 0.7          | C16 H7 N5 O Cl  |

## Single Mass Analysis

Tolerance = 5.0 PPM / DBE: min = -1.5, max = 50.0

Element prediction: Off

Number of isotope peaks used for i-FIT = 3

Monoisotopic Mass, Even Electron Ions

248 formula(e) evaluated with 2 results within limits (up to 50 closest results for each mass)

Elements Used:

C: 1-500 H: 1-1000 N: 1-10 O: 1-200

OD 28.07.2022

HRMS-CB-261 26 (0.123)

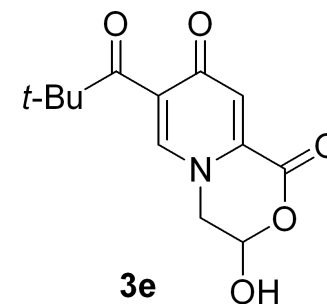28-Jul-2022 11:53:00  
TOF MS ES+  
1.08e+004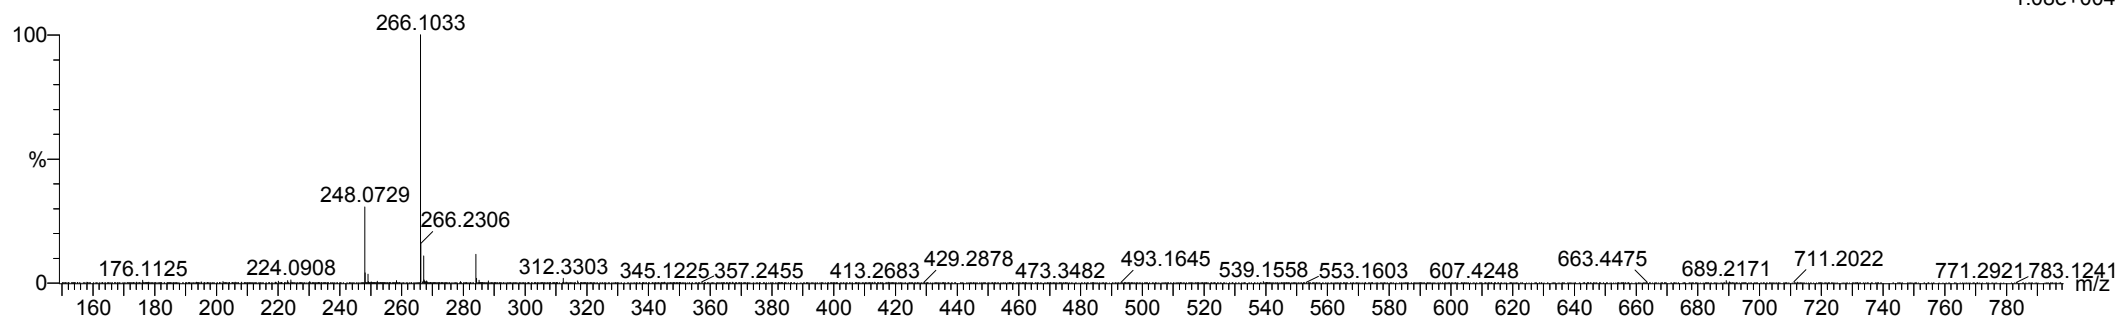

Minimum: -1.5  
Maximum: 5.0 5.0 50.0

| Mass     | Calc. Mass | mDa  | PPM  | DBE  | i-FIT | i-FIT (Norm) | Formula      |
|----------|------------|------|------|------|-------|--------------|--------------|
| 266.1033 | 266.1028   | 0.5  | 1.9  | 6.5  | 101.3 | 0.5          | C13 H16 N O5 |
|          | 266.1042   | -0.9 | -3.4 | 11.5 | 101.7 | 0.9          | C14 H12 N5 O |



Single Mass Analysis

Tolerance = 5.0 PPM / DBE: min = -1.5, max = 50.0

Element prediction: Off

Number of isotope peaks used for i-FIT = 3

Monoisotopic Mass, Even Electron Ions

229 formula(e) evaluated with 2 results within limits (up to 50 best isotopic matches for each mass)

Elements Used:

C: 1-500 H: 1-1000 N: 1-10 O: 1-200

OD 11.07.2022

HRMS-CB-242 49 (0.219)

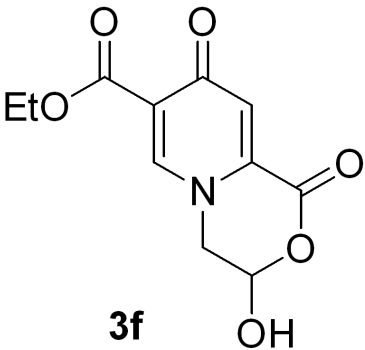

11-Jul-2022 14:57:25  
TOF MS ES+  
1.13e+003

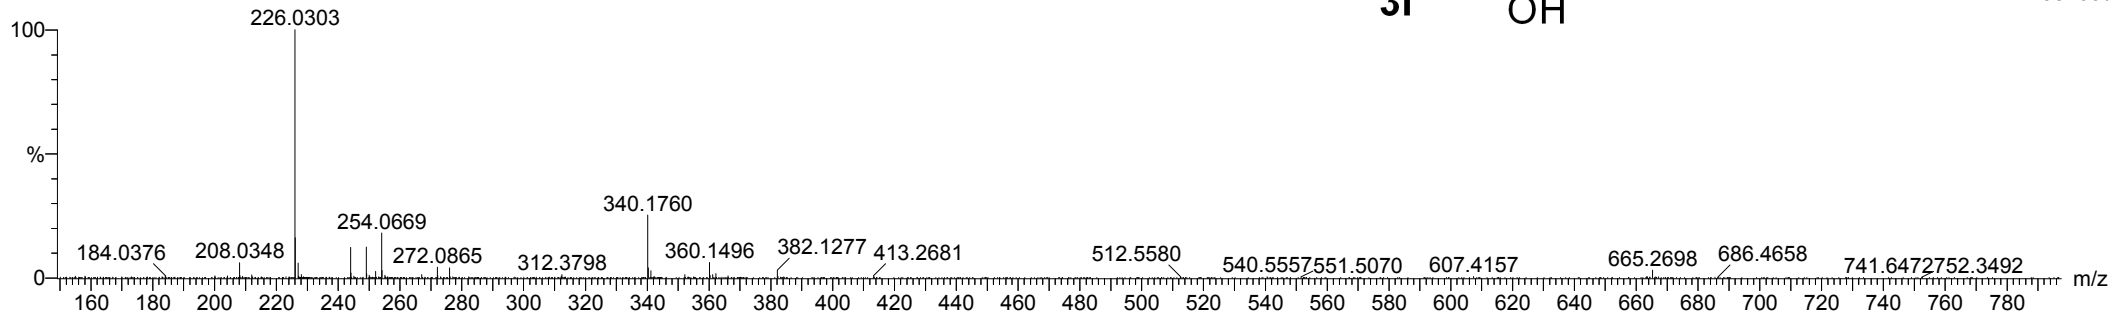

Minimum: -1.5  
Maximum: 5.0 5.0 50.0

| Mass     | Calc. Mass | mDa  | PPM  | DBE  | i-FIT | i-FIT (Norm) | Formula      |
|----------|------------|------|------|------|-------|--------------|--------------|
| 254.0669 | 254.0665   | 0.4  | 1.6  | 6.5  | 31.7  | 0.3          | C11 H12 N O6 |
|          | 254.0678   | -0.9 | -3.5 | 11.5 | 32.7  | 1.3          | C12 H8 N5 O2 |

# Elemental Composition Report

Page 1

## Single Mass Analysis

Tolerance = 5.0 PPM / DBE: min = -1.5, max = 50.0

Element prediction: Off

Number of isotope peaks used for i-FIT = 3

Monoisotopic Mass, Even Electron Ions

476 formula(e) evaluated with 2 results within limits (up to 50 closest results for each mass)

Elements Used:

C: 1-500 H: 1-1000 N: 1-10 O: 1-200

OD 25.10.2022

HRMS-CB-276 27 (0.128)

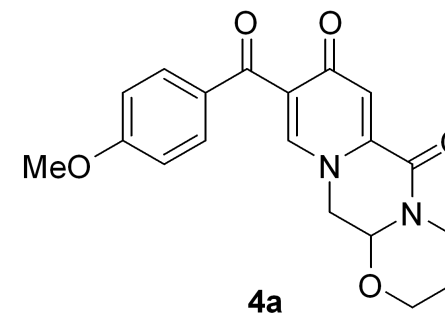

25-Oct-2022 12:52:17  
TOF MS ES+  
8.55e+003

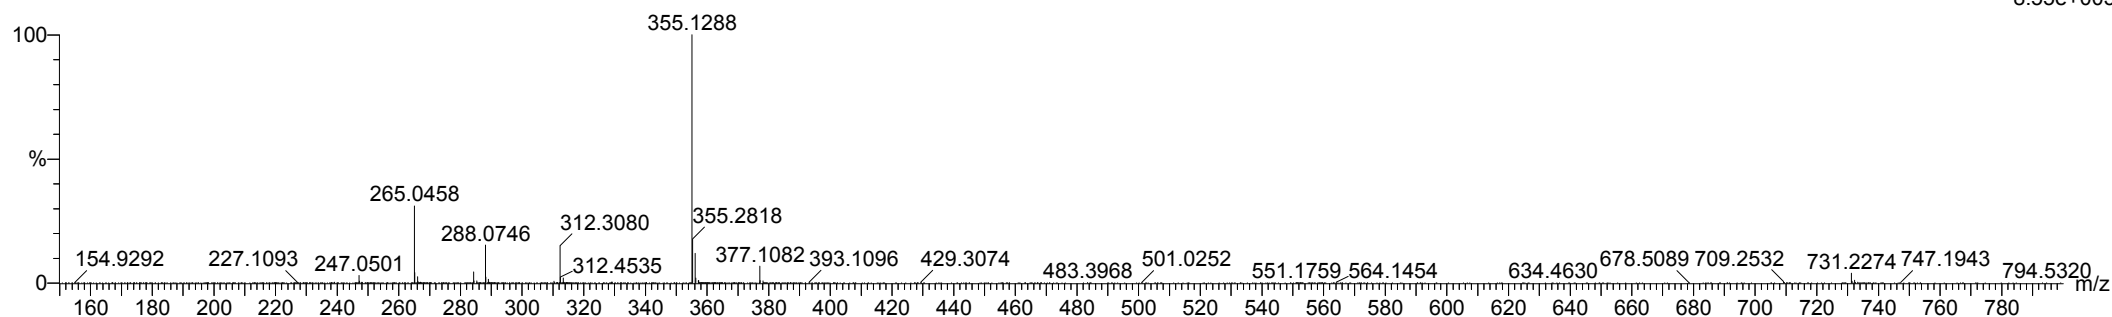

Minimum: -1.5  
Maximum: 5.0 5.0 50.0

| Mass     | Calc. Mass | mDa  | PPM  | DBE  | i-FIT | i-FIT (Norm) | Formula        |
|----------|------------|------|------|------|-------|--------------|----------------|
| 355.1288 | 355.1286   | 0.2  | 0.6  | -0.5 | 62.5  | 0.2          | C3 H19 N10 O10 |
|          | 355.1294   | -0.6 | -1.7 | 11.5 | 63.9  | 1.6          | C19 H19 N2 O5  |

Single Mass Analysis

Tolerance = 5.0 PPM / DBE: min = -1.5, max = 50.0

Element prediction: Off

Number of isotope peaks used for i-FIT = 3

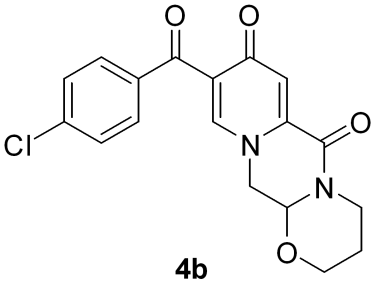

Monoisotopic Mass, Even Electron Ions

370 formula(e) evaluated with 3 results within limits (up to 50 closest results for each mass)

Elements Used:

C: 1-500 H: 1-1000 N: 1-10 O: 1-200 Cl: 1-1

OD 25.10.2022

HRMS-CB-278 20 (0.098)

25-Oct-2022 12:56:53

TOF MS ES+

1.75e+004

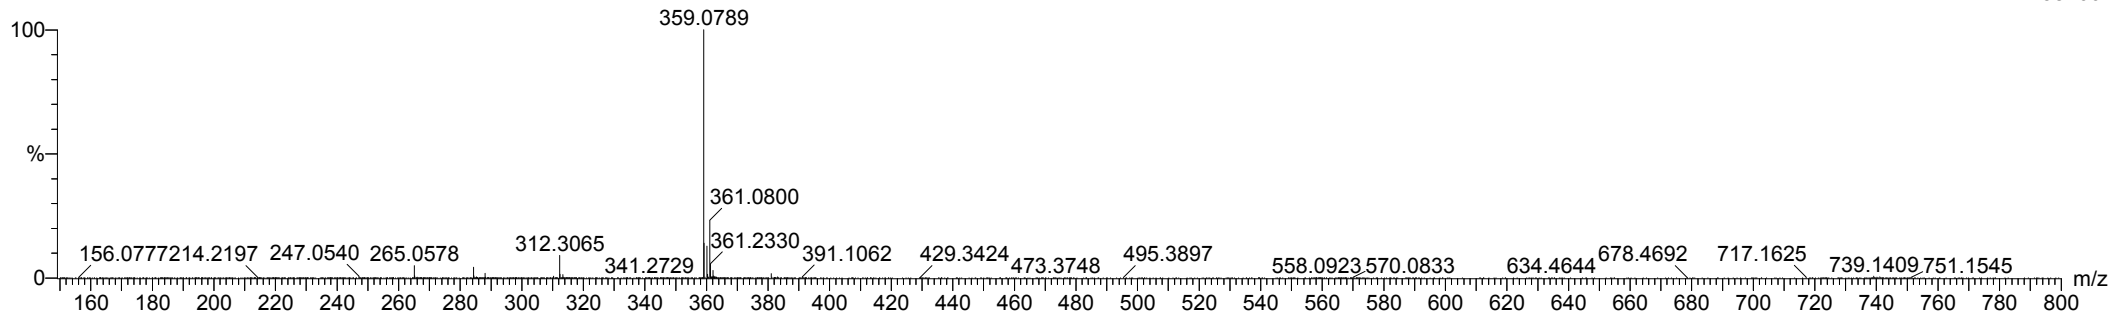

Minimum: -1.5  
Maximum: 5.0 5.0 50.0

| Mass     | Calc. Mass | mDa  | PPM  | DBE  | i-FIT | i-FIT (Norm) | Formula          |
|----------|------------|------|------|------|-------|--------------|------------------|
| 359.0789 | 359.0790   | -0.1 | -0.3 | -0.5 | 106.4 | 2.3          | C2 H16 N10 O9 Cl |
|          | 359.0799   | -1.0 | -2.8 | 11.5 | 104.9 | 0.8          | C18 H16 N2 O4 Cl |
|          | 359.0772   | 1.7  | 4.7  | 12.5 | 104.9 | 0.8          | C14 H12 N8 O2 Cl |

Elemental Composition Report

Single Mass Analysis

Tolerance = 5.0 PPM / DBE: min = -1.5, max = 50.0

Element prediction: Off

Number of isotope peaks used for i-FIT = 3

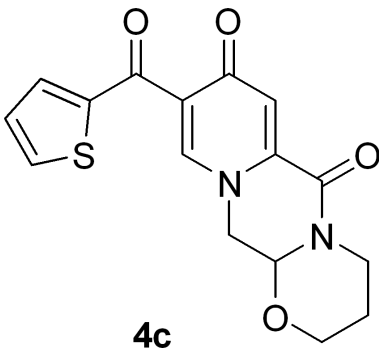

Monoisotopic Mass, Even Electron Ions  
336 formula(e) evaluated with 1 results within limits (up to 50 closest results for each mass)  
Elements Used:  
C: 1-500 H: 1-1000 N: 1-10 O: 1-200 S: 1-1  
OD 25.10.2022  
HRMS-CB-280 22 (0.107)

25-Oct-2022 13:03:30  
TOF MS ES+  
4.07e+003

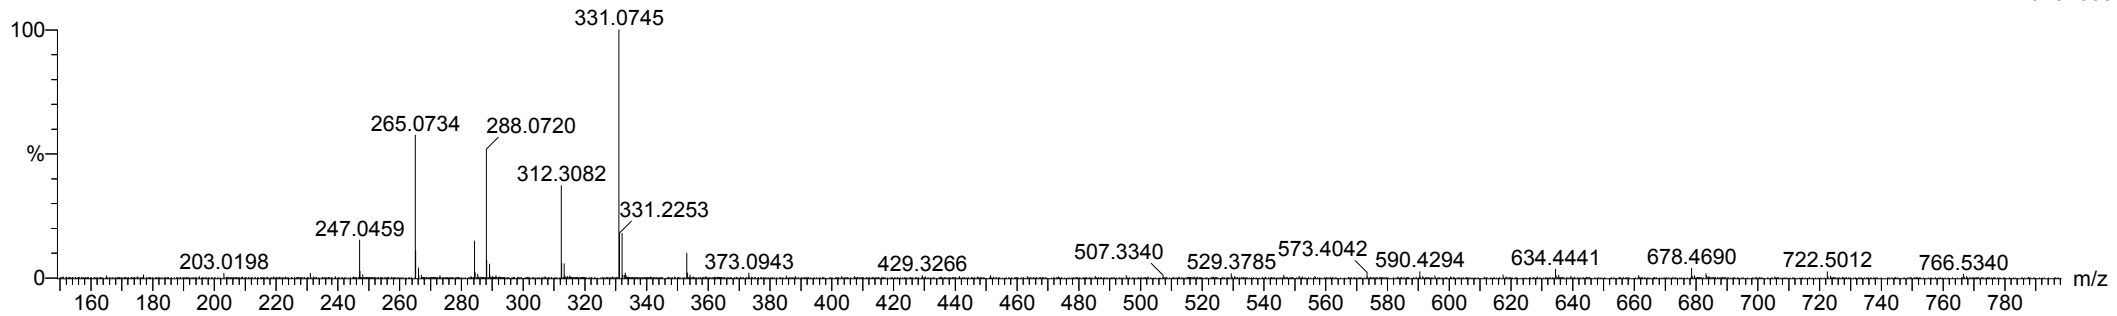

Minimum: -1.5  
Maximum: 50.0

| Mass     | Calc. Mass | mDa  | PPM  | DBE  | i-FIT | i-FIT (Norm) | Formula         |
|----------|------------|------|------|------|-------|--------------|-----------------|
| 331.0745 | 331.0753   | -0.8 | -2.4 | 10.5 | 69.0  | 0.0          | C16 H15 N2 O4 S |

Single Mass Analysis

Tolerance = 15.0 PPM / DBE: min = -1.5, max = 50.0

Element prediction: Off

Number of isotope peaks used for i-FIT = 3

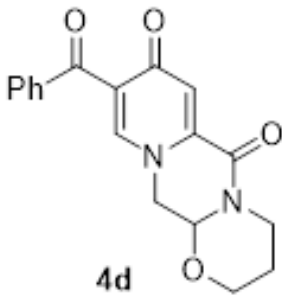

Monoisotopic Mass, Even Electron Ions

145 formula(e) evaluated with 1 results within limits (up to 50 closest results for each mass)

Elements Used:

C: 1-500 H: 1-1000 N: 1-3 O: 1-200

OD 26.12.2022

CB-305 53 (0.236)

26-Dec-2022 17:15:36

TOF MS ES+

8.16e+002

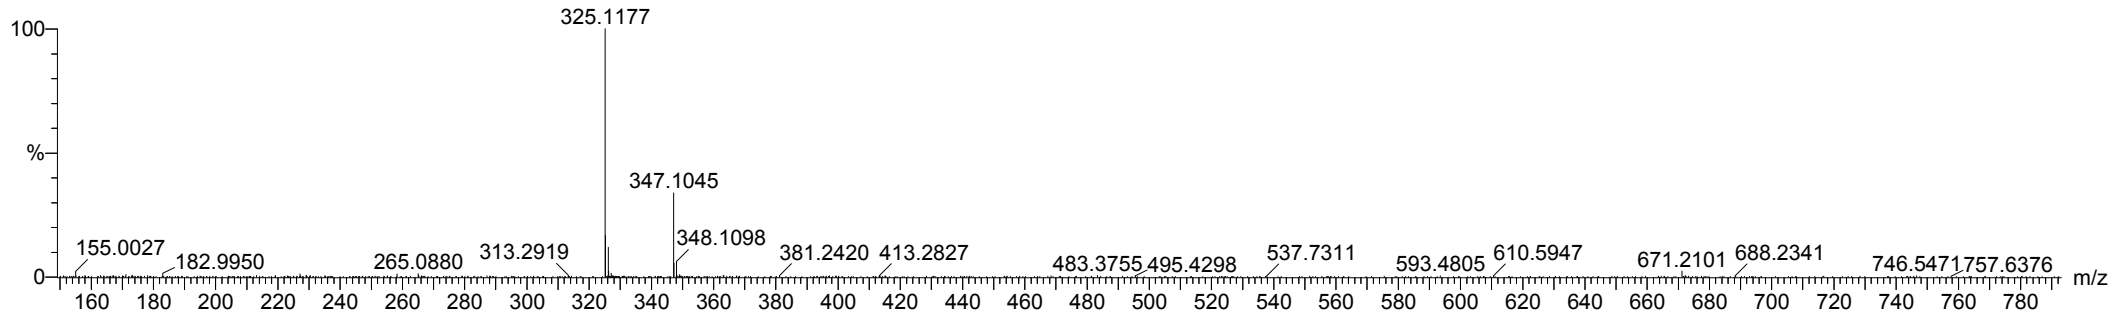

Minimum: -1.5  
Maximum: 5.0 15.0 50.0

| Mass     | Calc. Mass | mDa  | PPM  | DBE  | i-FIT | i-FIT (Norm) | Formula       |
|----------|------------|------|------|------|-------|--------------|---------------|
| 325.1177 | 325.1188   | -1.1 | -3.4 | 11.5 | 50.6  | 0.0          | C18 H17 N2 O4 |

## Single Mass Analysis

Tolerance = 5.0 PPM / DBE: min = -1.5, max = 50.0

Element prediction: Off

Number of isotope peaks used for i-FIT = 3

Monoisotopic Mass, Even Electron Ions

421 formula(e) evaluated with 2 results within limits (up to 50 closest results for each mass)

Elements Used:

C: 1-500 H: 1-1000 N: 1-10 O: 1-200

OD 25.10.2022

HRMS-CB-279 31 (0.144)

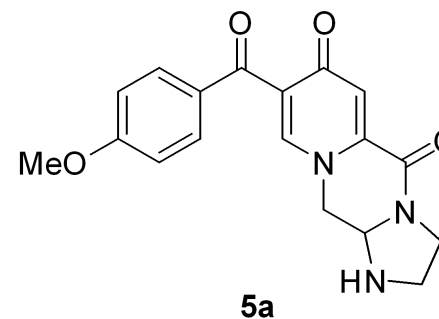

25-Oct-2022 13:01:11

TOF MS ES+

2.39e+002

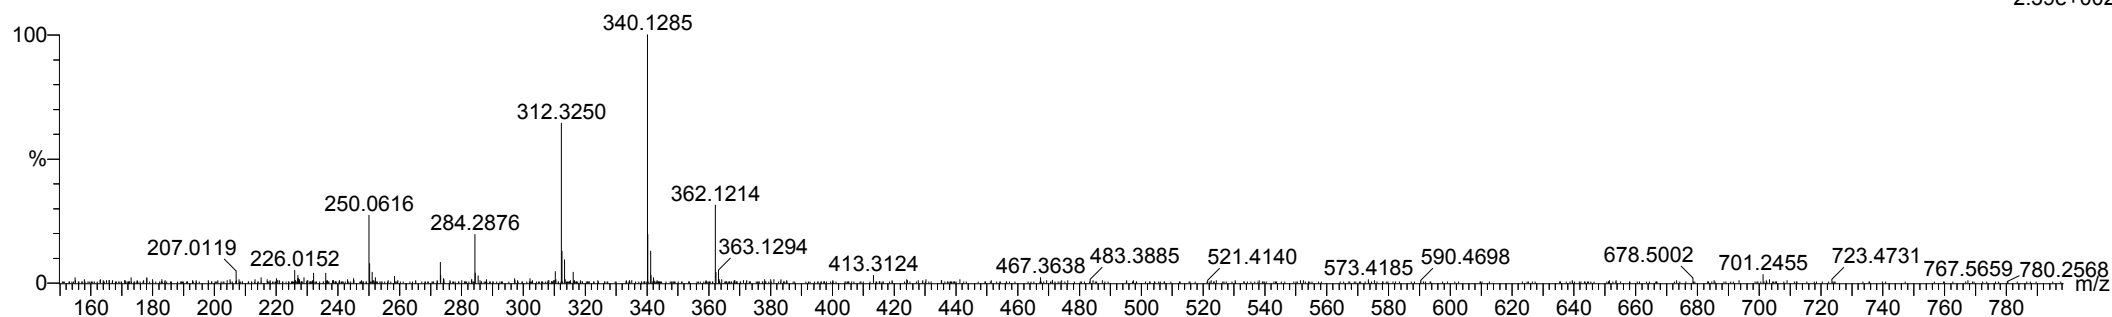

Minimum: -1.5  
Maximum: 5.0 5.0 50.0

| Mass     | Calc. Mass | mDa  | PPM  | DBE  | i-FIT | i-FIT (Norm) | Formula |     |    |    |
|----------|------------|------|------|------|-------|--------------|---------|-----|----|----|
| 340.1285 | 340.1297   | -1.2 | -3.5 | 11.5 | 31.4  | 0.6          | C18     | H18 | N3 | O4 |
|          | 340.1270   | 1.5  | 4.4  | 12.5 | 31.6  | 0.8          | C14     | H14 | N9 | O2 |

## Single Mass Analysis

Tolerance = 5.0 PPM / DBE: min = -1.5, max = 50.0

Element prediction: Off

Number of isotope peaks used for i-FIT = 3

Monoisotopic Mass, Even Electron Ions

344 formula(e) evaluated with 2 results within limits (up to 50 closest results for each mass)

Elements Used:

C: 1-500 H: 1-1000 N: 1-10 O: 1-200 Cl: 1-1

OD 25.10.2022

HRMS-CB-281 24 (0.115)

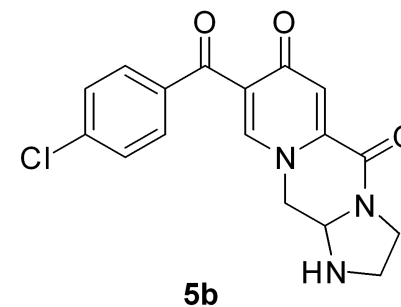25-Oct-2022 13:05:50  
TOF MS ES+  
4.36e+003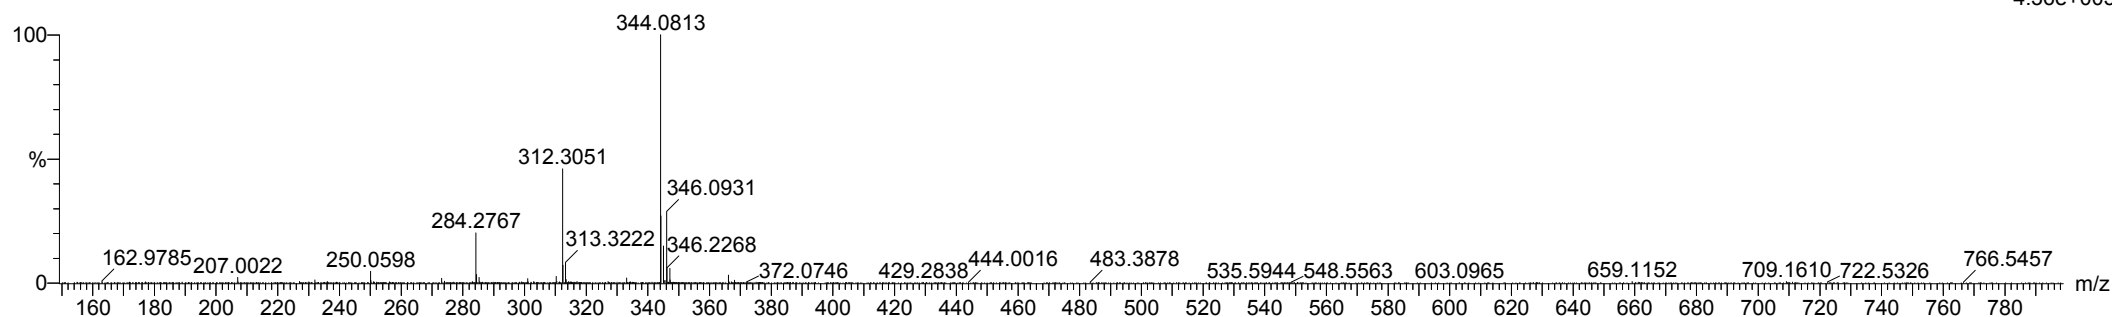

Minimum: -1.5  
Maximum: 5.0 5.0 50.0

| Mass     | Calc. Mass | mDa  | PPM  | DBE  | i-FIT | i-FIT (Norm) | Formula          |
|----------|------------|------|------|------|-------|--------------|------------------|
| 344.0813 | 344.0820   | -0.7 | -2.0 | -1.5 | 72.5  | 1.6          | C5 H19 N5 O10 Cl |
|          | 344.0802   | 1.1  | 3.2  | 11.5 | 71.2  | 0.2          | C17 H15 N3 O3 Cl |

Single Mass Analysis

Tolerance = 15.0 PPM / DBE: min = -1.5, max = 50.0

Element prediction: Off

Number of isotope peaks used for i-FIT = 3

Monoisotopic Mass, Even Electron Ions  
113 formula(e) evaluated with 2 results within limits (up to 50 closest results for each mass)  
Elements Used:  
C: 1-500 H: 1-1000 N: 1-3 O: 1-200 S: 1-1  
OD 27.12.2022  
CB-312 23 (0.111)

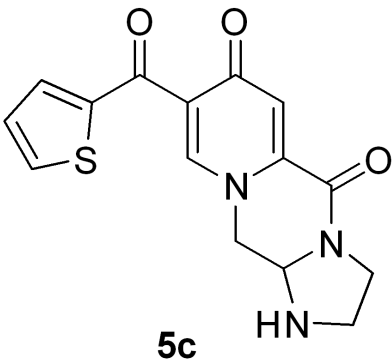

27-Dec-2022 13:32:08  
TOF MS ES+  
4.24e+003

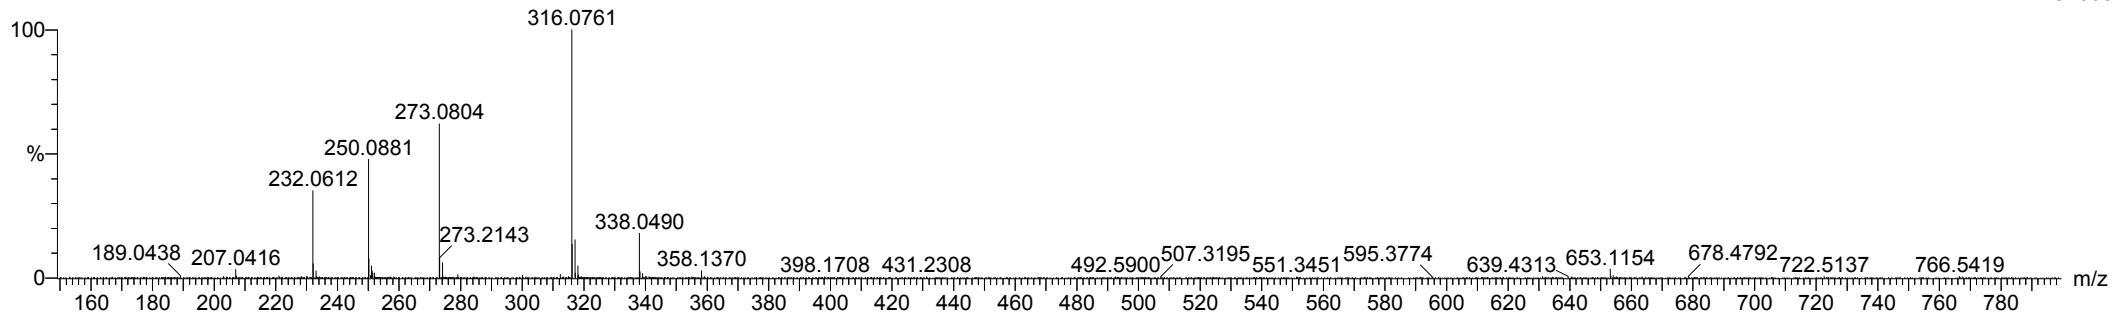

Minimum: -1.5  
Maximum: 5.0 15.0 50.0

| Mass     | Calc. Mass | mDa  | PPM   | DBE  | i-FIT | i-FIT (Norm) | Formula         |
|----------|------------|------|-------|------|-------|--------------|-----------------|
| 316.0761 | 316.0756   | 0.5  | 1.6   | 10.5 | 61.5  | 0.1          | C15 H14 N3 O3 S |
|          | 316.0796   | -3.5 | -11.1 | 14.5 | 64.1  | 2.6          | C20 H14 N O S   |



Single Mass Analysis

Tolerance = 15.0 PPM / DBE: min = -1.5, max = 50.0

Element prediction: Off

Number of isotope peaks used for i-FIT = 3

Monoisotopic Mass, Even Electron Ions  
168 formula(e) evaluated with 4 results within limits (up to 50 closest results for each mass)

Elements Used:  
C: 1-500 H: 1-1000 N: 1-3 O: 1-200

OD 27.12.2022  
CB-306\_2 22 (0.107)

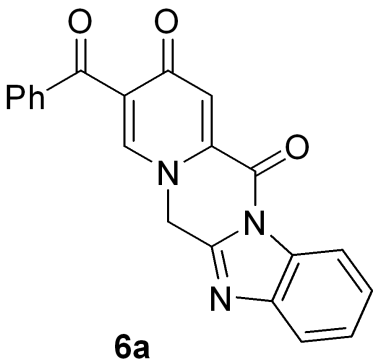

27-Dec-2022 13:36:05  
TOF MS ES+  
2.80e+003

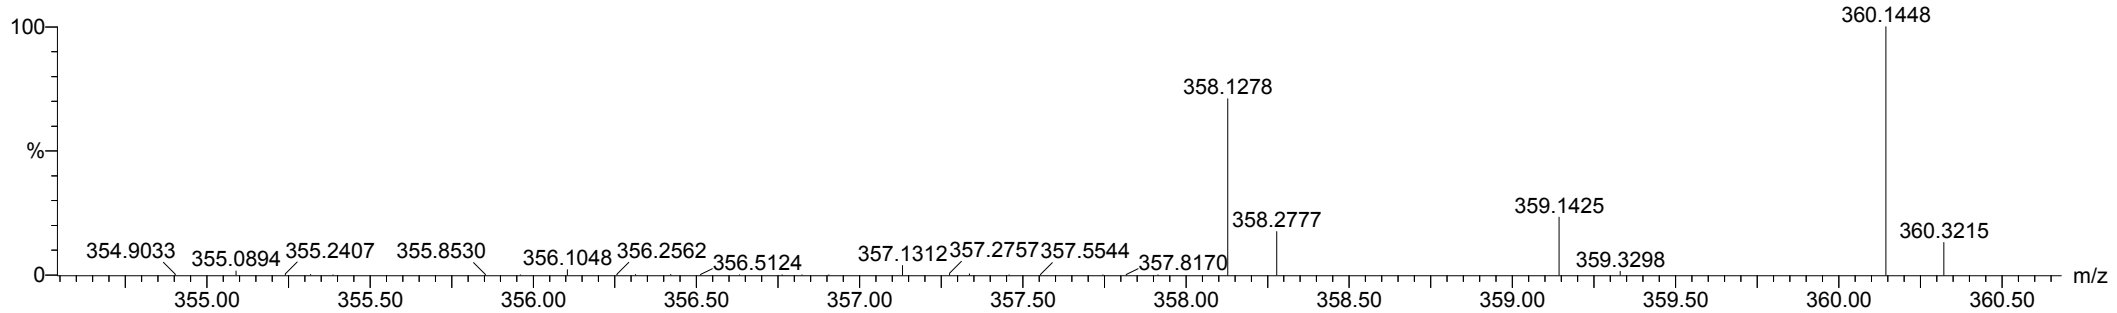

Minimum: -1.5  
Maximum: 5.0 15.0 50.0

| Mass     | Calc. Mass | mDa  | PPM   | DBE  | i-FIT | i-FIT (Norm) | Formula       |
|----------|------------|------|-------|------|-------|--------------|---------------|
| 356.1048 | 356.1040   | 0.8  | 2.2   | -1.5 | 73.4  | 2.0          | C8 H22 N O14  |
|          | 356.1035   | 1.3  | 3.7   | 16.5 | 73.1  | 1.8          | C21 H14 N3 O3 |
|          | 356.1075   | -2.7 | -7.6  | 20.5 | 72.4  | 1.0          | C26 H14 N O   |
|          | 356.1094   | -4.6 | -12.9 | 7.5  | 72.5  | 1.1          | C14 H18 N3 O8 |

Single Mass Analysis

Tolerance = 15.0 PPM / DBE: min = -1.5, max = 50.0

Element prediction: Off

Number of isotope peaks used for i-FIT = 3

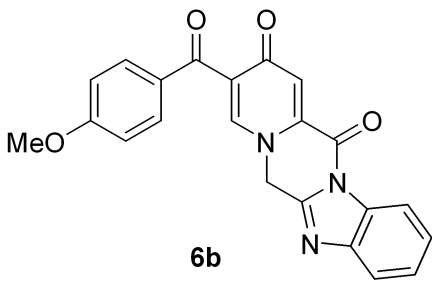

Monoisotopic Mass, Even Electron Ions  
194 formula(e) evaluated with 4 results within limits (up to 50 closest results for each mass)

Elements Used:

C: 1-500 H: 1-1000 N: 1-3 O: 1-200

OD 27.12.2022

CB-309\_2 30 (0.140)

27-Dec-2022 13:54:26  
TOF MS ES+  
3.48e+002

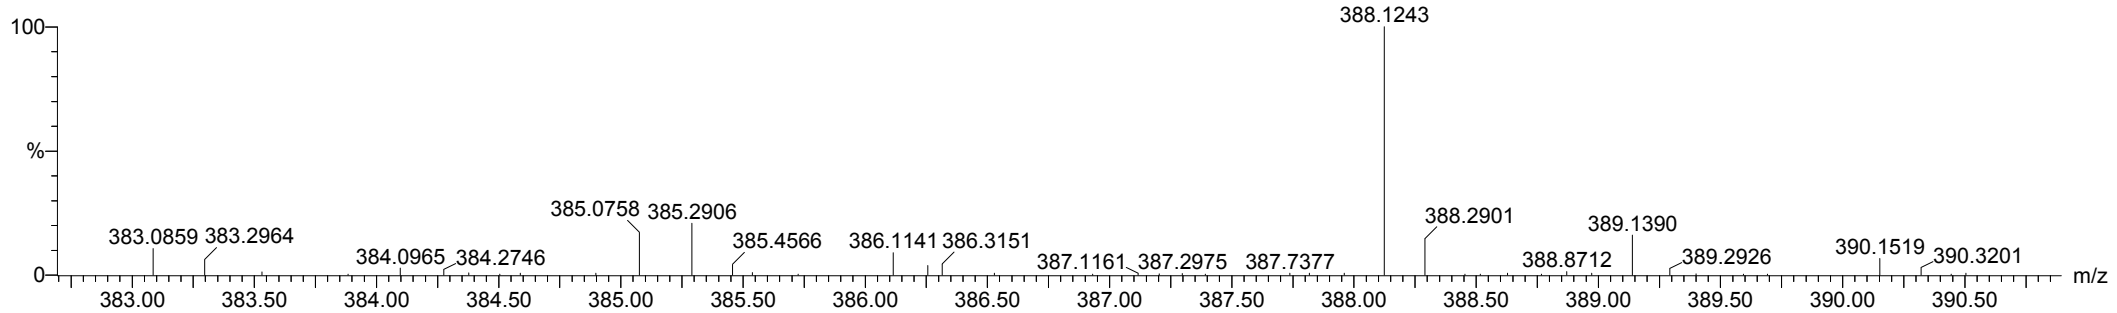

Minimum: -1.5  
Maximum: 5.0 15.0 50.0

| Mass     | Calc. Mass | mDa  | PPM   | DBE  | i-FIT | i-FIT (Norm) | Formula       |
|----------|------------|------|-------|------|-------|--------------|---------------|
| 386.1141 | 386.1141   | 0.0  | 0.0   | 16.5 | 54.8  | 1.8          | C22 H16 N3 O4 |
|          | 386.1146   | -0.5 | -1.3  | -1.5 | 55.2  | 2.2          | C9 H24 N O15  |
|          | 386.1181   | -4.0 | -10.4 | 20.5 | 53.3  | 0.3          | C27 H16 N O2  |
|          | 386.1087   | 5.4  | 14.0  | 7.5  | 57.7  | 4.7          | C16 H20 N O10 |
